# Supplementary material for: Management of type 2 diabetes mellitus in people with severe mental illness: an online cross-sectional survey of healthcare professionals
Source: PubMed Central journal article supplement — BMJ Open. 2018 Feb 15;8(2):e019400. doi: 10.1136/bmjopen-2017-019400 (PMC5829882; doi:10.1136/bmjopen-2017-019400), 2018-02-15
Supplement: bmjopen-2017-019400.draft_revisions.pdf [file bmjopen-2017-019400.draft_revisions.pdf]

# BMJ Open

BMJ Open is committed to open peer review. As part of this commitment we make the peer review history of every article we publish publicly available.

When an article is published we post the peer reviewers' comments and the authors' responses online. We also post the versions of the paper that were used during peer review. These are the versions that the peer review comments apply to.

The versions of the paper that follow are the versions that were submitted during the peer review process. They are not the versions of record or the final published versions. They should not be cited or distributed as the published version of this manuscript.

BMJ Open is an open access journal and the full, final, typeset and author-corrected version of record of the manuscript is available on our site with no access controls, subscription charges or pay-per-view fees (<http://bmjopen.bmj.com>).

If you have any questions on BMJ Open's open peer review process please email [editorial.bmjopen@bmj.com](mailto:editorial.bmjopen@bmj.com)

# BMJ Open

## Management of type 2 diabetes mellitus in people with severe mental illness: an online cross-sectional survey of healthcare professionals

|                                 |                                                                                                                                                                                                                                                                                                                                                                                                                                                                                                                                                                                                                                                                                                                                          |
|---------------------------------|------------------------------------------------------------------------------------------------------------------------------------------------------------------------------------------------------------------------------------------------------------------------------------------------------------------------------------------------------------------------------------------------------------------------------------------------------------------------------------------------------------------------------------------------------------------------------------------------------------------------------------------------------------------------------------------------------------------------------------------|
| Journal:                        | <i>BMJ Open</i>                                                                                                                                                                                                                                                                                                                                                                                                                                                                                                                                                                                                                                                                                                                          |
| Manuscript ID                   | bmjopen-2017-019400                                                                                                                                                                                                                                                                                                                                                                                                                                                                                                                                                                                                                                                                                                                      |
| Article Type:                   | Research                                                                                                                                                                                                                                                                                                                                                                                                                                                                                                                                                                                                                                                                                                                                 |
| Date Submitted by the Author:   | 05-Sep-2017                                                                                                                                                                                                                                                                                                                                                                                                                                                                                                                                                                                                                                                                                                                              |
| Complete List of Authors:       | McBain, H; City, University of London, School of Health Sciences<br>Lamontagne-Godwin, Frederique; University of West London College of Nursing Midwifery and Healthcare, Richard Wells Research Centre<br>Haddad, Mark; City, University of London, School of Health Sciences<br>Simpson, Alan; City, University of London, School of Health Sciences; East London NHS Foundation Trust, Newham Centre for Mental Health<br>Chapman, Jacqui; University of East London, Diabetes Unit<br>Jones, Julia; University of Hertfordshire, Centre for Research in Primary & Community Care<br>Flood, Chris; City, University of London, School of Health Sciences<br>Mulligan, Kathleen; City, University of London, School of Health Sciences |
| <b>Primary Subject Heading</b>: | Diabetes and endocrinology                                                                                                                                                                                                                                                                                                                                                                                                                                                                                                                                                                                                                                                                                                               |
| Secondary Subject Heading:      | Mental health, Health services research                                                                                                                                                                                                                                                                                                                                                                                                                                                                                                                                                                                                                                                                                                  |
| Keywords:                       | General diabetes < DIABETES & ENDOCRINOLOGY, Quality in health care < HEALTH SERVICES ADMINISTRATION & MANAGEMENT, MENTAL HEALTH, Schizophrenia & psychotic disorders < PSYCHIATRY                                                                                                                                                                                                                                                                                                                                                                                                                                                                                                                                                       |
|                                 |                                                                                                                                                                                                                                                                                                                                                                                                                                                                                                                                                                                                                                                                                                                                          |

SCHOLARONE™  
Manuscripts

1  
2  
3  
4 **Management of type 2 diabetes mellitus in people with severe**  
5  
6  
7 **mental illness: an online cross-sectional survey of healthcare**  
8  
9  
10 **professionals**  
11  
12  
13  
14

15 Dr Hayley McBain<sup>1</sup>, Frederique Lamontagne-Godwin<sup>2</sup>, Dr Mark Haddad<sup>1</sup>, Professor Alan Simpson<sup>1,3</sup>,  
16 Jacqui Chapman<sup>4</sup>, Dr Julia Jones<sup>5</sup>, Dr Chris Flood<sup>1</sup> & Dr Kathleen Mulligan<sup>1,6</sup>  
17  
18  
19  
20

21 <sup>1</sup> School of Health Sciences, City, University of London, London, UK  
22

23 <sup>2</sup> College of Nursing, Midwifery and Healthcare, University of West London, London, UK  
24

25 <sup>3</sup> Newham Centre for Mental Health, East London NHS Foundation Trust, London, UK  
26

27 <sup>4</sup> Diabetes Unit, East London NHS Foundation Trust, London, UK  
28

29 <sup>5</sup> Centre for Research in Primary & Community Care (CRIPACC), University of Hertfordshire, Hatfield,  
30 UK  
31  
32

33 <sup>6</sup> Community Health Newham, East London NHS Foundation Trust, London, UK  
34  
35  
36  
37

38 Corresponding author:  
39

40 Dr Kathleen Mulligan, School of Health Sciences, City University of London, Myddleton Street,  
41

42 London, EC1R 1UW. [Kathleen.mulligan.1@city.ac.uk](mailto:Kathleen.mulligan.1@city.ac.uk), 0207 040 0889  
43  
44  
45  
46

47 Word count 4217  
48  
49  
50  
51  
52  
53  
54  
55  
56  
57  
58  
59  
60

## ABSTRACT

### Objectives

To establish healthcare professionals' (HCPs) views about clinical roles, and the barriers and enablers to delivery of diabetes care for people with severe mental illness (SMI).

### Design

Cross-sectional, postal and online survey.

### Setting

Trusts within the National Health Service (NHS), mental health and diabetes charities and professional bodies.

### Participants

HCPs who care for people with type 2 diabetes mellitus (T2DM) and/or SMI in the UK.

### Primary and secondary outcome measures

The barriers, enablers and experiences of delivering T2DM care for people with SMI, informed by the Theoretical Domains Framework (TDF).

### Results

Responders were 273 HCPs, primarily mental health nurses (33.7%) and psychiatrists (32.2%). Only 25% of respondents had received training in managing T2DM in people with SMI. Mental health professionals felt responsible for significantly fewer recommended diabetes care standards than physical health professionals ( $p<0.001$ ). For those seeing diabetes care as part of their role, the significant barriers to its delivery in the multivariate analysis were a lack of knowledge ( $p=0.003$ ); a need for training in communication and negotiation skills ( $p=0.04$ ); a lack of optimism about the health of their clients ( $p=0.04$ ) and their ability to manage T2DM in people with SMI ( $p=0.003$ ); threat of discipline ( $p=0.02$ );

1  
2  
3 fear of mental health ( $p=0.01$ ); a lack of service user engagement ( $p=0.006$ ) and a need for incentives  
4  
5 ( $p=0.04$ ). The significant enablers were an understanding of the need to tailor treatments ( $p=0.04$ ) and  
6  
7 goals ( $p=0.02$ ) for people with SMI.  
8  
9

## 10 **Conclusions**

11  
12 This survey indicates that despite current guidelines, diabetes care in mental health settings remains  
13  
14 peripheral. Even when diabetes care is perceived as part of a HCP's role, various individual and  
15  
16 organisational barriers to delivering recommended T2DM care standards to people with SMI are  
17  
18 experienced.  
19  
20  
21  
22  
23  
24  
25  
26  
27  
28  
29  
30  
31  
32  
33  
34  
35  
36  
37  
38  
39  
40  
41  
42  
43  
44  
45  
46  
47  
48  
49  
50  
51  
52  
53  
54  
55  
56  
57  
58  
59  
60

## STRENGTHS AND LIMITATIONS OF THIS STUDY

- The survey is informed by the Theoretical Domains Framework, a robust theoretical approach to exploring the barriers and enablers to behaviour change, guided by the MRC Framework for developing complex interventions
- We attempted to recruit participants from a range of sources, including NHS trusts, charities and professional bodies in the UK
- The cross-sectional study design means cause and effect relationships cannot be established
- The survey failed to capture the barriers and enablers to delivering recommended diabetes care to people with SMI by healthcare professionals who did not see this as being part of their clinical role
- Despite the recruitment strategy aiming to target a range of healthcare professionals, GPs, diabetologists and physical health nurses are under-represented

## INTRODUCTION

Diabetes affects an estimated 415 million people worldwide and accounts for 12% of international health expenditure.[1] In the UK, 6.2% of adults are estimated to have diabetes and as in other high income countries approximately 90% of these have type 2 diabetes (T2DM).[1] There are a range of important risk factors for the development of T2DM, one of which is diagnosis of a severe mental illness (SMI), which is associated with a 2-3 fold increase in likelihood of developing the condition[2]. This increased risk has been attributed to poor diet, obesity and physical inactivity,[2, 3] the effects of anti-psychotic medications[4] and high rates of smoking.[5] As a consequence, those with T2DM and SMI die significantly younger than people with T2DM without SMI[6] and experience a greater risk of T2DM complications that require specialist treatment.[7]

These significant health inequalities may in part be explained by variations in diabetes care.[8, 9] Evidence suggests that people with SMI can be less likely to receive more novel cost-intensive medications,[10] retinopathy screening;[11, 8] foot examinations;[8] testing of HbA1c,[8, 9] renal checks;[8] and diabetes education.[12] They are also less likely to be hospitalised for diabetes than those with diabetes alone.[12, 9] The reasons for these disparities in care are wide ranging. At an individual level the knowledge and skills of mental health nurses to deliver and support diabetes care has been questioned[13, 14, 15] and previous theory-driven qualitative research that underpins this study[16] found that not knowing how to manage and monitor T2DM and engage and communicate with service users were significant barriers to delivering recommended care. There is also poor awareness, particularly amongst mental health professionals, about national and local guidelines for managing T2DM.[16] Despite hope and optimism being central to facilitating recovery in people with SMI,[17] healthcare professionals have also been found to be despondent about the health of their clients,[16] which could impact on how service users are engaged and how care is delivered.

1  
2  
3  
4  
5 At an organisational level the lack of integrated mental and physical health care services has been  
6  
7 identified as a barrier to delivering care. Care pathways for people with a SMI and diabetes are often  
8  
9 complex and fragmented and healthcare professionals value integrated care and easy access to a  
10  
11 multidisciplinary team,[16] Despite this, co-location of mental and physical services seems to have  
12  
13 had variable impact on the delivery of diabetes care.[18] There also appear to be issues in relation to  
14  
15 perceived roles and responsibilities. Whilst some research shows confusion and role ambiguity about  
16  
17 the responsibility for monitoring and supporting people with T2DM and SMI,[13] our previous  
18  
19 research indicates a clear demarcation between the perceived responsibilities of mental health  
20  
21 versus primary care and specialist diabetes services[16]. This is in opposition to current  
22  
23 recommendations that promote shared responsibility between mental and physical health care  
24  
25 services.[19, 20, 21]  
26  
27  
28  
29

30 Guided by the Medical Research Council (MRC) recommendations for developing complex  
31  
32 interventions,[22] in order to create a theoretically- and evidence-based intervention, this study  
33  
34 aimed to explore a full range of potential barriers and enablers to delivering diabetes care to people  
35  
36 with SMI and model these relationships. This will allow for selection of key behaviour change  
37  
38 techniques and subsequent incorporation of them in an intervention to improve the care delivered  
39  
40 to this population. The purpose of this study was therefore to identify the primary barriers and  
41  
42 enablers that affect the practice of primary care, specialist mental health and diabetes specialist  
43  
44 clinicians in their management of T2DM in people with SMI.  
45  
46  
47

## 48 **METHODS**

### 51 **Participants**

52  
53 A cross-sectional, online survey was conducted between September 2015 and September 2016. The  
54  
55 target population was any healthcare professional involved in the care of people with either T2DM  
56  
57



1  
2  
3 and/or SMI. Targeted staff emails, containing a link to the survey, were sent to relevant staff groups  
4  
5 by 9 NHS Trusts providing mental health services in the UK. GP practices across the UK were  
6  
7 approached via 5 Clinical Commissioning Groups. Flyers were distributed at 8 professional  
8  
9 healthcare conferences in the UK and Europe. The Royal Colleges of GPs, Psychiatrists and Nursing,  
10  
11 along with the Association of British Clinical Diabetologists, shared the survey via social media  
12  
13 and/or via their postal and online newsletters, as did the charity Diabetes UK. Staff were informed  
14  
15 that a donation of £2 would be made to a diabetes or mental health charity for each completed  
16  
17 survey questionnaire. The study was approved by the Wales Research Ethics Committee 7 (ref.  
18  
19 15/WA/0310).

20  
21  
22  
23  
24 The size of the target population is in excess of 100,000, comprised of UK GPs, specialists in general  
25  
26 psychiatry and endocrinology and diabetes mellitus[23] as well as qualified mental health nurses[24]  
27  
28 and diabetes specialist nurses.[25]

### 31 **Sample size estimation**

32  
33 We anticipated that the survey items concerning the level and extent of clinical activity conducted  
34  
35 would reveal differences according to professional groupings. Calculation based upon the estimated  
36  
37 mean or proportional difference between the 5 professional groups indicated a required sample of  
38  
39 200 for mean differences between independent groups with 80% power and alpha 0.05.

### 42 **Measures**

43  
44  
45 *Demographic factors:* Age and gender were collected from participants.

46  
47  
48 *Occupational factors:* Data were collected on profession, length of time in current role, length of  
49  
50 time qualified, country of practice, and site of practice (in- or outpatient). Participants were asked  
51  
52 the proportion of their patient group who had T2DM, SMI and comorbid T2DM and SMI. If they had  
53  
54 received training in how to care for people with T2DM and comorbid T2DM and SMI, and if so when  
55  
56  
57

1  
2  
3 and where this was. Along with the access they had to any clinical guidelines for the management of  
4  
5 T2DM.

6  
7 *Barriers and enablers:* A 33-item questionnaire (Supplementary file A) was developed to measure  
8  
9 the barriers and enablers to delivering diabetes care to people with SMI, based on qualitative work  
10  
11 undertaken by the team[16]. Items were generated based on the beliefs reported by healthcare  
12  
13 professionals in these interviews, with the most relevant selected through a consensus  
14  
15 approach.[16] The Theoretical Domains Framework (TDF) was used to guide this process to ensure  
16  
17 that the survey was able to capture a comprehensive range of factors that could act as barriers or  
18  
19 enablers to delivering diabetes care. Items covered each of the 14 domains within the TDF (1)  
20  
21 knowledge (2) skills (3) intention (4) social professional role & identity (5) social influence (6) goals  
22  
23 (7) beliefs about consequences (8) beliefs about capabilities (9) memory, attention & decision  
24  
25 processes (10) environmental context & resources (11) behavioural regulation (12) emotion (13)  
26  
27 reinforcement (14) optimism. Responses were on a 5-point Likert scale from 1 strongly agree to 5  
28  
29 strongly disagree. All items were reverse scored.

30  
31  
32 *Delivery of diabetes care:* As part of the 33-item TDF questionnaire participants were asked if each of  
33  
34 the nine key components of diabetes care[26] were part of their role. A sum scores was calculated in  
35  
36 order to measure the degree to which diabetes care was part of a person's professional role. If  
37  
38 participants responded yes to this question, they were then asked 'Over the past 12 months, given  
39  
40 10 service users with diabetes and SMI, for how many did you deliver that aspect of care?'

#### 41 42 43 **Statistical analysis**

44  
45  
46 Data were analysed using IBM SPSS Statistics v.23. Little's Missing Completely at Random (MCAR)  
47  
48 test was non-significant ( $\chi^2 = 439.564$ ,  $df = 484$ ,  $p = 0.93$ ) and hence data was MCAR. Missing data  
49  
50 was managed using multiple imputation methods. Differences between the professional groups  
51  
52 were explored using ANOVA. Negative binomial and Poisson regressions were used to assess the  
53  
54 predictors of implementing diabetes guidelines in people with SMI. Entry of variables into the  
55  
56  
57

1  
2  
3 regression analysis was based on significant univariate associations between the predictor and  
4  
5 outcome ( $p = 0.05$ ).  
6  
7

## 8 RESULTS

### 11 Participants

12  
13 A total of 386 healthcare professionals consented into the study. Across the entire dataset there was  
14  
15 27.86% missing data, with complete data for 151 participants (39.11%), and 113 participants  
16  
17 (29.27%) with more than 50% missing data. Of the 88 individual variables all had some degree of  
18  
19 missing data. After excluding participants with more than 50% missing data there was a final sample  
20  
21 of 273 (71%).  
22  
23

24  
25  
26 A majority of the 273 participants were British ( $n=179$ , 66%) and female ( $n=96$ , 35%) (Table 1).  
27

28 Participants were primarily mental health nurses ( $n=92$ , 33.7%) or psychiatrists ( $n = 88$ , 32.2%). Most  
29  
30 were practicing in England, in a community setting and had been in their current role for on average  
31  
32 9 years (SD = 8.39 years).  
33  
34  
35  
36

37 **Table 1. Participant descriptors**

| 38 Variable                  | n   | %   |
|------------------------------|-----|-----|
| 39 Ethnicity                 |     |     |
| 40 British                   | 179 | 66  |
| 41 Any other white           | 29  | 11  |
| 42 Irish                     | 10  | 3.7 |
| 43 Indian                    | 10  | 3.7 |
| 44 African                   | 9   | 3.3 |
| 45 Asian                     | 5   | 1.8 |
| 46 Pakistani                 | 5   | 1.8 |
| 47 Any other ethnic group    | 5   | 1.8 |
| 48 White and black African   | 4   | 1.5 |
| 49 Any other mixed           | 4   | 1.5 |
| 50 White and Asian           | 3   | 1.1 |
| 51 Caribbean                 | 3   | 1.1 |
| 52 Bangladeshi               | 2   | 0.7 |
| 53 Chinese                   | 2   | 0.7 |
| 54 White and black Caribbean | 1   | 0.4 |
| 55 Any other black           | 1   | 0.4 |

| Variable                          | n   | %   |
|-----------------------------------|-----|-----|
| Profession                        |     |     |
| mental health nurse               | 92  | 34  |
| psychiatrist                      | 88  | 32  |
| general practitioner              | 24  | 8.8 |
| diabetes specialist nurse         | 17  | 6.2 |
| practice nurse                    | 12  | 4.4 |
| diabetologist                     | 8   | 2.2 |
| physical health nurse             | 8   | 2.9 |
| other                             | 6   | 2.9 |
| district or community nurse       | 5   | 1.8 |
| occupational therapist            | 2   | 0.7 |
| assistant practitioner            | 2   | 0.7 |
| social worker or social therapist | 2   | 0.7 |
| endocrinologist                   | 1   | 0.4 |
| dietician                         | 1   | 0.4 |
| student                           | 1   | 0.4 |
| audiologist and speech therapist  | 1   | 0.4 |
| healthcare assistant              | 1   | 0.4 |
| mental health support worker      | 1   | 0.4 |
| podiatrist                        | 1   | 0.4 |
| Country of practice               |     |     |
| England                           | 236 | 86  |
| Scotland                          | 4   | 1.5 |
| Wales                             | 2   | 0.7 |
| Other                             | 5   | 1.8 |
| Site                              |     |     |
| community                         | 142 | 52  |
| inpatient                         | 72  | 26  |
| both                              | 59  | 22  |

### Care of T2DM

The proportion of respondents' case load with T2DM was primarily either less than 5% or greater than 20% (Table 2). Approximately 60% of the sample specifically managed diabetes in people with SMI, however only 25% had received any training in how to do so. Of those that had, this had been within their service or via CPD, in the past year. There was no significant association between profession and receipt of training ( $\chi^2 (1, n = 273) = 4.72, p = 0.32$ ).

**Table 2. Case load and experiences of training**

| Variable                         | n  | %    |
|----------------------------------|----|------|
| Proportion of patients with T2DM |    |      |
| 5% or less                       | 76 | 27.8 |
| 10%                              | 47 | 17.2 |
| 15%                              | 33 | 12.1 |

| Variable                                                                           | n   | %     |
|------------------------------------------------------------------------------------|-----|-------|
| 20% or more                                                                        | 71  | 26.0  |
| Have you had specific training in assessing and managing T2DM?                     |     |       |
| Yes                                                                                | 147 | 53.8  |
| No                                                                                 | 126 | 46.2  |
| When was the most recent training in T2DM you received?                            |     |       |
| In the last year                                                                   | 65  | 44.23 |
| 1-2 years ago                                                                      | 26  | 17.69 |
| 2-4 years ago                                                                      | 20  | 13.61 |
| More than 4 years ago                                                              | 36  | 24.49 |
| If you have received training for assessing and /or managing T2DM, where was this? |     |       |
| Degree                                                                             | 49  | 33.33 |
| Diploma                                                                            | 21  | 14.29 |
| In-service training                                                                | 94  | 63.95 |
| CPD                                                                                | 69  | 46.94 |
| Postgraduate                                                                       | 2   | 1.36  |
| Other                                                                              | 15  | 10.20 |
| Do you have access to clinical guidelines for the management of type 2 diabetes?   |     |       |
| Yes                                                                                | 238 | 87.2  |
| No                                                                                 | 35  | 12.8  |
| If yes, which guidelines are these?                                                |     |       |
| National Institute for Health and Care Excellence                                  | 12  | 5.04  |
| Local trust                                                                        | 146 | 61.34 |
| World Health Organisation                                                          | 3   | 1.26  |
| Scottish Intercollegiate Guidelines Network                                        | 5   | 2.10  |
| Trend UK                                                                           | 1   | 0.42  |
| American Diabetes Association                                                      | 5   | 2.10  |
| Research Society for the Study of Diabetes in India                                | 1   | 0.42  |
| International Diabetes Federation                                                  | 1   | 0.42  |
| American Association of Clinical Endocrinologists                                  | 2   | 0.84  |
| European Medicines Agency                                                          | 1   | 0.42  |
| Joint British Diabetes Societies                                                   | 2   | 0.84  |
| Charity                                                                            | 2   | 0.84  |
| European Foundation for the Study of Diabetes                                      | 1   | 0.42  |
| Other                                                                              | 8   | 3.36  |
| Do any of the patients that you provide care for have SMI?                         |     |       |
| Yes                                                                                | 258 | 94.5  |
| No                                                                                 | 15  | 5.5   |
| If yes, what proportion of your patients has SMI?                                  |     |       |
| 5% or less                                                                         | 42  | 16.28 |
| 10%                                                                                | 11  | 4.26  |
| 15%                                                                                | 11  | 4.26  |
| 20% or more                                                                        | 162 | 62.79 |
| Have you had specific training in assessing and managing SMI?                      |     |       |
| Yes                                                                                | 209 | 76.6  |
| No                                                                                 | 64  | 23.4  |
| When was the most training in SMI you received?                                    |     |       |
| In the last year                                                                   | 137 | 65.55 |
| 1-2 years ago                                                                      | 19  | 9.09  |
| 2-4 years ago                                                                      | 19  | 9.09  |
| More than 4 years ago                                                              | 34  | 16.27 |

| Variable                                                                                              | n   | %     |
|-------------------------------------------------------------------------------------------------------|-----|-------|
| If you have received training for assessing and/or managing SMI, was this:                            |     |       |
| Pre-registration                                                                                      | 17  | 8.13  |
| Post-registration                                                                                     | 49  | 23.44 |
| Both                                                                                                  | 143 | 68.42 |
| If you have received training for assessing and /or managing SMI, where was this?                     |     |       |
| Degree                                                                                                | 110 | 52.63 |
| Diploma                                                                                               | 63  | 30.14 |
| In-service training                                                                                   | 158 | 75.60 |
| CPD                                                                                                   | 128 | 61.24 |
| MRCPsych                                                                                              | 7   | 3.35  |
| Other                                                                                                 | 10  | 4.78  |
| Do you provide diabetes care for people who have SMI?                                                 |     |       |
| Yes                                                                                                   | 163 | 59.7  |
| No                                                                                                    | 110 | 40.3  |
| Have you had specific training in assessing and managing diabetes in people with SMI?                 |     |       |
| Yes                                                                                                   | 71  | 26    |
| No                                                                                                    | 202 | 74    |
| When was the most training in assessing and managing diabetes in people with SMI you received?        |     |       |
| In the last year                                                                                      | 29  | 40.85 |
| 1-2 years ago                                                                                         | 18  | 25.35 |
| 2-4 years ago                                                                                         | 12  | 16.90 |
| More than 4 years ago                                                                                 | 12  | 16.90 |
| If you have received training for assessing and/or managing diabetes in people with SMI, was this:    |     |       |
| Pre-registration                                                                                      | 6   | 8.45  |
| Post-registration                                                                                     | 45  | 63.38 |
| Both                                                                                                  | 20  | 28.17 |
| If you have received training for assessing and /or managing T2DM in people with SMI, where was this? |     |       |
| Degree                                                                                                | 10  | 14.08 |
| Diploma                                                                                               | 9   | 12.68 |
| In-service training                                                                                   | 44  | 61.97 |
| CPD                                                                                                   | 36  | 50.70 |
| Other                                                                                                 | 5   | 7.04  |

### Barriers and enablers to delivering diabetes care

In order to have sufficient numbers to make comparisons between professions, participants were grouped as either (1) mental health nurses and support workers, (2) psychiatrists, (3) GPs, (3) other nurses (including practice nurses, diabetes specialist nurses, district or community nurses, healthcare assistants, assistant practitioners), (4) allied and other health professions and (5) diabetologists and

1  
2  
3  
4  
5  
6  
7  
8  
9  
10  
11  
12  
13  
14  
15  
16  
17  
18  
19  
20  
21  
22  
23  
24  
25  
26  
27  
28  
29  
30  
31  
32  
33  
34  
35  
36  
37  
38  
39  
40  
41  
42  
43  
44  
45  
46  
47

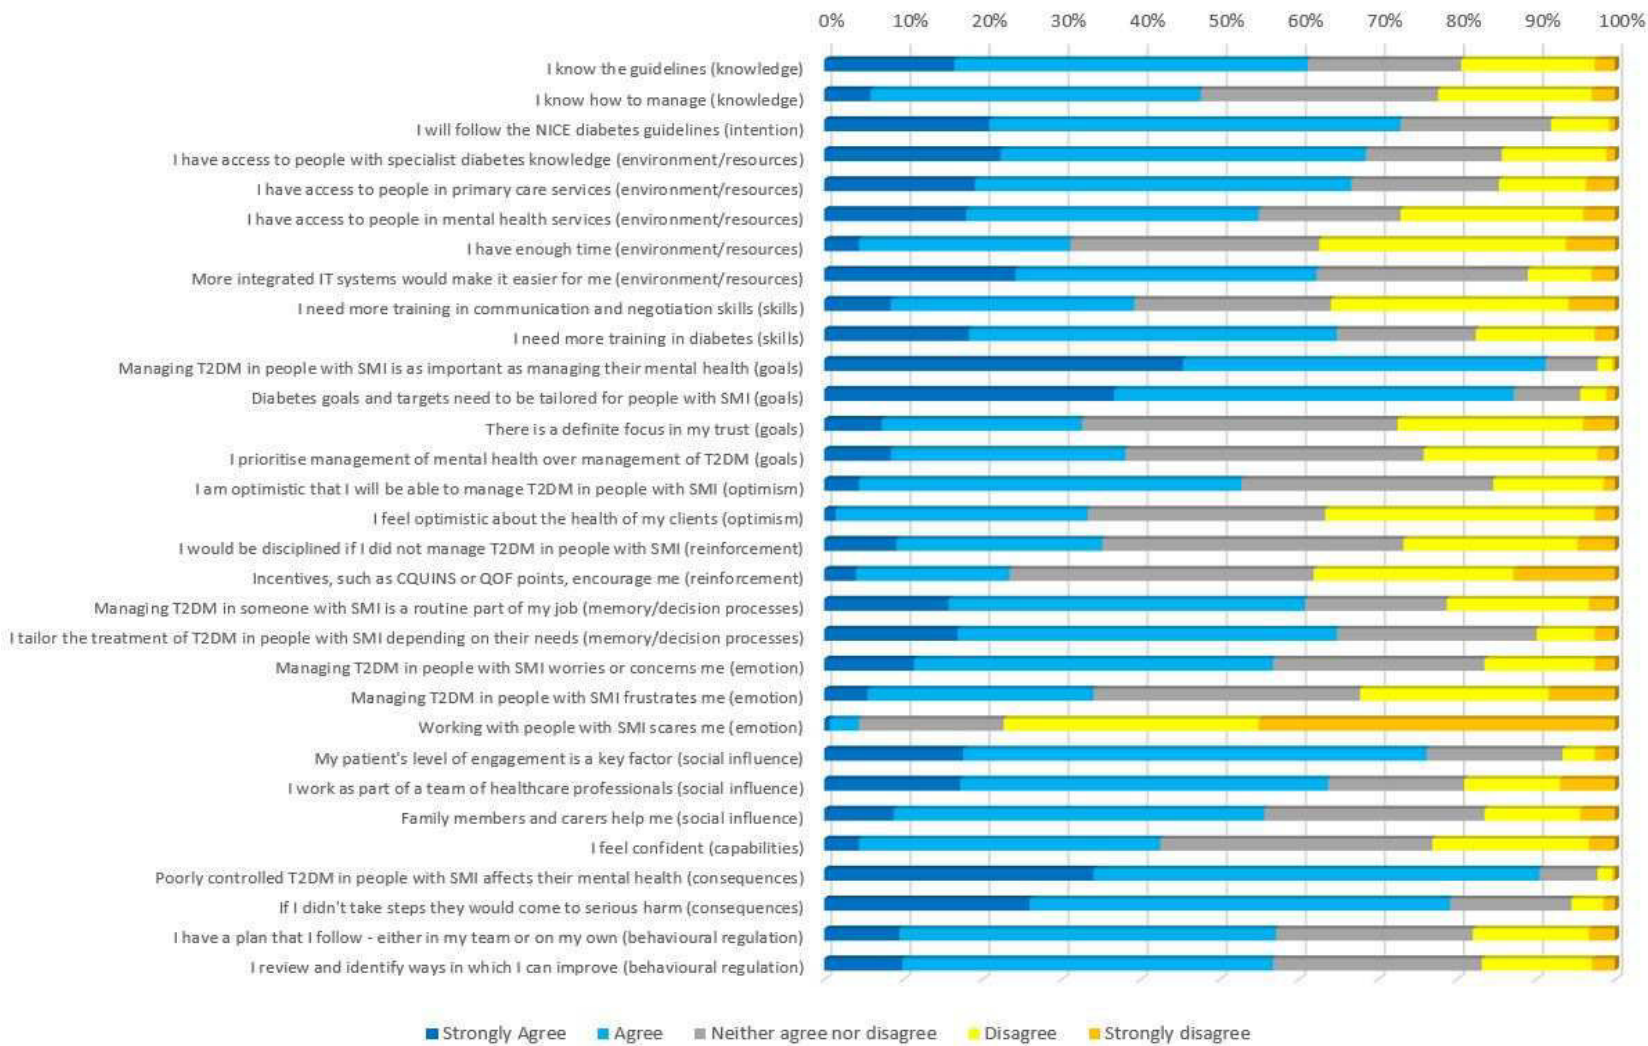

Figure 1. Barriers and enablers to delivery of T2DM care in people with SMI (n = 273)

1  
2  
3 endocrinologists. Figure 1 displays the responses in relation to each of the 33-items of the TDF  
4 questionnaire. Only statistically significant differences between the professions are reported below  
5  
6 (see Supplementary file B for all analyses).  
7  
8  
9

## 10 Barriers

### 11 12 13 *Individual factors*

14  
15 Only a third of the sample felt confident in their abilities to manage T2DM in people with SMI and  
16 only 42% were optimistic about the health of their clients with T2DM. Although 57% felt that  
17 managing T2DM in people with SMI was at times worrying or concerning, only a third felt frustrated  
18 and only 4% fearful of working with people with SMI. Physical health nurses were however,  
19 significantly more scared to work with someone with SMI compared with psychiatrists ( $p = 0.002$ ).  
20  
21  
22  
23  
24  
25

### 26 27 *Organisations factors*

28  
29 A third of respondents felt they would be disciplined if they did not manage T2DM in someone with  
30 SMI. Mental health nurses and support workers were significantly more likely to believe this than  
31 both psychiatrists ( $p = 0.002$ ) and GPs ( $p = 0.03$ ).  
32  
33  
34  
35  
36  
37

38 Whilst 65% reported that they needed more training in diabetes in order to manage T2DM in people  
39 with SMI, a third requested more training to improve their communication and negotiation skills.  
40 Allied and other health professionals, along with mental health nurses and support workers, were  
41 more likely to agree that they needed more training in diabetes than GPs (MHN:  $p = 0.12$ ; AHP:  $p =$   
42 0.02) and diabetologists or endocrinologists (AHP:  $p = 0.04$ ). Physical health nurses were more likely  
43 to request training in communication and negotiation skills compared with psychiatrists ( $p < 0.001$ ).  
44  
45  
46  
47  
48  
49  
50  
51

52  
53 Only a third of the sample felt that there was a definite focus within their organisation on the  
54 management of T2DM in people with SMI. GPs were significantly less likely to agree that this was the  
55  
56  
57  
58  
59  
60



case than mental health professionals (MHN:  $p < 0.001$ ; psychiatrists:  $p = 0.01$ ), physical health nurses ( $p = 0.02$ ) and diabetologist or endocrinologists ( $p = 0.03$ ).

Perceived roles and responsibilities varied significantly between professions and the elements of care. Only a quarter of the sample felt that examining sensation and circulation in the feet; agreeing a personalised HbA1c target and offering regular reviews; and referring to retinopathy screening were part of their role (Table 3). Approximately half felt that providing general education, monitoring cholesterol and kidney function and providing personalised advice about diet and exercise were part of their clinical role, whilst 67% and 83% of participants, respectively, felt that monitoring blood pressure and giving advice about weight management were within their remit. Diabetologists or endocrinologists, GPs and physical health nurses all reported being responsible for significantly more of the 9 diabetes care standards than mental health nurses and support workers ( $p < 0.001$ ), psychiatrists ( $p < 0.001$ ) and allied and other health professions ( $p < 0.001$ ).

**Table 3. Healthcare professional perceived role in the management of T2DM in SMI**

|                                                    | This is part of my clinical role<br>n(%) | Average number of service users out of 10, with both type 2 diabetes and SMI that had been...?<br>M(SD) |
|----------------------------------------------------|------------------------------------------|---------------------------------------------------------------------------------------------------------|
| Given advice about weight management               | 226(82.78)                               | 5.84(3.28)                                                                                              |
| Had their BP monitored                             | 184(67.40)                               | 6.75(2.92)                                                                                              |
| Given general education about T2DM                 | 162(59.34)                               | 5.58(3.12)                                                                                              |
| Given personalised advice about diet and nutrition | 159(58.24)                               | 5.88(3.11)                                                                                              |
| Had their cholesterol monitored                    | 128(46.87)                               | 6.77(2.80)                                                                                              |
| Had their kidney function monitored                | 121(44.32)                               | 7.39(2.44)                                                                                              |
| Had their feet examined                            | 77(28.21)                                | 5.45(3.29)                                                                                              |
| Agreed personalised HbA1c target                   | 77(28.21)                                | 6.55(2.85)                                                                                              |
| Referred to retinopathy screening                  | 68(24.91)                                | 4.92(3.81)                                                                                              |

## Facilitators

### *Individual factors*

Half of the sample reported that they knew how to manage T2DM in people with SMI, although allied and other health professionals felt significantly less able to manage T2DM in people with SMI than mental health nurses and support workers ( $p = 0.03$ ), GPs ( $p = 0.04$ ) and diabetologists and endocrinologists ( $p = 0.003$ ). Diabetologists and endocrinologists also felt more able than psychiatrists ( $p = 0.03$ ). Whilst 61% knew the local or national guidelines for managing T2DM, 75% reported that the likelihood of following these guidelines were high. Those working primarily within the physical health domain felt significantly more knowledgeable about these guidelines than mental health nurses and support workers ( $p \leq 0.001$ ), psychiatrists ( $p < 0.001$ ) and allied and other health professionals ( $p = 0.001$ ).

For 61% of the sample, care of T2DM had become a routine part of their role, more so for GPs than psychiatrists ( $p = 0.009$ ) and other allied health professionals ( $p = 0.009$ ), and 53% felt optimistic that they would be able to do it in the future. Although 91% believed that managing T2DM in people with SMI is as important as managing their mental health, in practice 38% prioritised the management of mental health over the management of T2DM.

For three quarters of respondents, being able to engage with service users was a key factor in being able to manage T2DM in this population. For 65% this included being able to tailor treatments, along with the service user's goals and targets (87%), depending on the client's needs and abilities.

Physical health nurses were more likely to report this than psychiatrists ( $p < 0.01$ ). For half of the sample this was aided by having a plan and reviewing their practise to improve the delivery of future care.

1  
2  
3 Between 80 and 90% reported that poorly controlled T2DM in people with SMI further affected the  
4 service user's mental health and that if they didn't take steps to manage T2DM service users would  
5 come to serious harm.  
6  
7

### 8 9 10 *Organisational factors*

11  
12 Less than a quarter of participants felt they were encouraged to manage T2DM in people with SMI  
13 by incentives. Both mental health nurses and support workers, and GPs were however more likely to  
14 agree that incentives encouraged them compared to psychiatrists (MHN:  $p = 0.007$ ; GP:  $p = 0.01$ ).  
15  
16

17  
18 Overall 60% of the sample had sufficient time to manage this population, mental health nurses and  
19 support workers were however more likely to agree that this was the case than GPs ( $p = 0.04$ ).  
20  
21

22  
23 Between half and three quarters of respondents felt they had access to other professionals or  
24 worked within multidisciplinary teams who could assist them in caring for someone with T2DM and  
25 SMI, this included working with family members or carers. This could be better aided by integrated  
26 IT systems for 62% of participants.  
27  
28  
29  
30

### 31 32 **Implementation of diabetes care**

33  
34 For those participants who indicated that a diabetes care standard was part of their role (Table 3),  
35 on average 5 of every 10 service users with diabetes and SMI were referred on for retinopathy  
36 screening; 5-6 were offered diabetes education, advice about weight management, diet and  
37 nutrition and had their feet examined; 6-7 had their BP monitored, personalised HbA1c targets  
38 agreed and their cholesterol monitored and 7 out of 10 had their kidney function monitored.  
39  
40  
41  
42  
43  
44  
45

### 46 47 **Predictors of implementing diabetes care**

48  
49 Table 4 displays the results of regression analysis to predict implementation of the 9 diabetes care  
50 standards. The predictors shown in the table are those that were significantly related to the  
51 outcomes in univariate analysis.  
52  
53  
54  
55  
56  
57  
58  
59  
60

Table 4. Regressions displaying predictors of diabetes care.

| Outcome   | Predictors                                                                              | Hypothesis Test |             |             | Exp( $\beta$ ) | 95% Wald Confidence Interval for Exp( $\beta$ ) |             |
|-----------|-----------------------------------------------------------------------------------------|-----------------|-------------|-------------|----------------|-------------------------------------------------|-------------|
|           |                                                                                         | Wald $\chi^2$   | df          | p           |                | Lower                                           | Upper       |
| Education | <b>(Intercept)</b>                                                                      | <b>6.07</b>     | <b>1.00</b> | <b>0.02</b> | <b>2.39</b>    | <b>1.19</b>                                     | <b>4.80</b> |
|           | I know the guidelines                                                                   | 0.38            | 1.00        | 0.90        | 0.99           | 0.90                                            | 1.10        |
|           | <b>I know how to manage</b>                                                             | <b>5.51</b>     | <b>1.00</b> | <b>0.04</b> | <b>1.15</b>    | <b>1.02</b>                                     | <b>1.30</b> |
|           | I will follow the NICE diabetes guidelines                                              | 1.75            | 1.00        | 0.33        | 1.07           | 0.96                                            | 1.18        |
|           | I have access to people with specialist diabetes knowledge                              | 0.48            | 1.00        | 0.76        | 1.02           | 0.94                                            | 1.10        |
|           | I need more training in diabetes                                                        | 1.79            | 1.00        | 0.25        | 0.96           | 0.89                                            | 1.02        |
|           | I am optimistic that I will be able to manage T2DM in people with SMI                   | 0.07            | 1.00        | 0.88        | 0.99           | 0.88                                            | 1.11        |
|           | Managing T2DM in someone with SMI is a routine part of my job                           | 0.74            | 1.00        | 0.52        | 1.04           | 0.94                                            | 1.16        |
|           | I tailor the treatment of T2DM in people with SMI depending on their needs              | 0.14            | 1.00        | 0.95        | 1.00           | 0.90                                            | 1.11        |
|           | Managing T2DM in people with SMI worries or concerns me                                 | 1.55            | 1.00        | 0.26        | 0.95           | 0.88                                            | 1.03        |
|           | I feel confident                                                                        | 0.62            | 1.00        | 0.64        | 0.96           | 0.84                                            | 1.10        |
|           | I review how I manage T2DM in people with SMI, and identify ways in which I can improve | 0.24            | 1.00        | 0.86        | 1.01           | 0.92                                            | 1.11        |
|           | <b>How many of the 9 diabetes care standard are you responsible for?</b>                | <b>10.52</b>    | <b>1.00</b> | <b>0.00</b> | <b>1.06</b>    | <b>1.02</b>                                     | <b>1.10</b> |
| Weight    | <b>(Intercept)</b>                                                                      | <b>16.34</b>    | <b>1.00</b> | <b>0.00</b> | <b>2.97</b>    | <b>1.75</b>                                     | <b>5.03</b> |
|           | <b>Profession</b>                                                                       | <b>24.18</b>    | <b>4.00</b> | <b>0.00</b> | -              | -                                               | -           |
|           | Mental health nurses and support workers                                                | 0.55            | 1.00        | 0.50        | 0.91           | 0.71                                            | 1.18        |
|           | Psychiatrists                                                                           | 2.86            | 1.00        | 0.09        | 1.24           | 0.97                                            | 1.59        |
|           | GP                                                                                      | 1.15            | 1.00        | 0.33        | 0.86           | 0.65                                            | 1.14        |
|           | Other nurses                                                                            | 0.35            | 1.00        | 0.56        | 1.08           | 0.84                                            | 1.38        |
|           | I know the guidelines                                                                   | 3.21            | 1.00        | 0.10        | 1.08           | 0.99                                            | 1.17        |
|           | I know how to manage                                                                    | 1.55            | 1.00        | 0.24        | 1.06           | 0.96                                            | 1.17        |
|           | I have access to people with specialist diabetes knowledge                              | 1.99            | 1.00        | 0.26        | 0.96           | 0.90                                            | 1.02        |
|           | I need more training in diabetes                                                        | 1.10            | 1.00        | 0.34        | 0.97           | 0.92                                            | 1.03        |
|           | I feel confident                                                                        | 0.21            | 1.00        | 0.80        | 1.01           | 0.92                                            | 1.11        |
|           | I review how I manage T2DM in people with SMI, and identify ways in which I can improve | 1.84            | 1.00        | 0.32        | 1.05           | 0.97                                            | 1.13        |
|           | <b>How many of the 9 diabetes care standard are you responsible for?</b>                | <b>7.00</b>     | <b>1.00</b> | <b>0.02</b> | <b>1.04</b>    | <b>1.01</b>                                     | <b>1.07</b> |
| Diet      | <b>(Intercept)</b>                                                                      | <b>11.62</b>    | <b>1.00</b> | <b>0.01</b> | <b>2.07</b>    | <b>1.36</b>                                     | <b>3.16</b> |
|           | I know the guidelines                                                                   | 0.51            | 1.00        | 0.65        | 1.02           | 0.94                                            | 1.12        |

| Outcome                                                                  | Predictors                                                                                | Hypothesis Test |             |             | Exp( $\beta$ ) | 95% Wald Confidence Interval for Exp( $\beta$ ) |             |
|--------------------------------------------------------------------------|-------------------------------------------------------------------------------------------|-----------------|-------------|-------------|----------------|-------------------------------------------------|-------------|
|                                                                          |                                                                                           | Wald $\chi^2$   | df          | p           |                | Lower                                           | Upper       |
|                                                                          | I know how to manage                                                                      | 1.26            | 1.00        | 0.41        | 1.05           | 0.95                                            | 1.16        |
|                                                                          | <b>I feel optimistic about the health of my clients</b>                                   | <b>4.69</b>     | <b>1.00</b> | <b>0.04</b> | <b>1.08</b>    | <b>1.01</b>                                     | <b>1.17</b> |
|                                                                          | Managing T2DM in someone with SMI is a routine part of my job                             | 0.17            | 1.00        | 0.85        | 1.01           | 0.92                                            | 1.10        |
|                                                                          | I review how I manage T2DM in people with SMI, and identify ways in which I can improve   | 3.60            | 1.00        | 0.15        | 1.08           | 0.99                                            | 1.18        |
|                                                                          | How many of the 9 diabetes care standard are you responsible for?                         | 4.48            | 1.00        | 0.06        | 1.04           | 1.00                                            | 1.07        |
| BP                                                                       | <b>(Intercept)</b>                                                                        | <b>7.47</b>     | <b>1.00</b> | <b>0.01</b> | <b>2.43</b>    | <b>1.28</b>                                     | <b>4.58</b> |
|                                                                          | I will follow the NICE diabetes guidelines                                                | 0.14            | 1.00        | 0.79        | 1.01           | 0.94                                            | 1.09        |
|                                                                          | I have access to people with specialist diabetes knowledge                                | 0.33            | 1.00        | 0.79        | 1.01           | 0.94                                            | 1.09        |
|                                                                          | I need more training in diabetes                                                          | 4.24            | 1.00        | 0.05        | 0.94           | 0.88                                            | 1.00        |
|                                                                          | I am optimistic that I will be able to manage T2DM in people with SMI                     | 2.97            | 1.00        | 0.11        | 1.09           | 0.99                                            | 1.20        |
|                                                                          | <b>Managing T2DM in someone with SMI is a routine part of my job</b>                      | <b>5.33</b>     | <b>1.00</b> | <b>0.04</b> | <b>1.11</b>    | <b>1.01</b>                                     | <b>1.22</b> |
|                                                                          | I tailor the treatment of T2DM in people with SMI depending on their needs                | 0.51            | 1.00        | 0.53        | 0.97           | 0.89                                            | 1.06        |
|                                                                          | My patient's level of engagement is a key factor                                          | 3.14            | 1.00        | 0.09        | 1.07           | 0.99                                            | 1.16        |
|                                                                          | I feel confident                                                                          | 3.58            | 1.00        | 0.08        | 0.91           | 0.83                                            | 1.01        |
|                                                                          | If I didn't take steps to manage T2DM in people with SMI, they would come to serious harm | 3.76            | 1.00        | 0.11        | 1.09           | 1.00                                            | 1.18        |
|                                                                          | I review how I manage T2DM in people with SMI, and identify ways in which I can improve   | 0.54            | 1.00        | 0.60        | 1.02           | 0.95                                            | 1.11        |
|                                                                          | How many of the 9 diabetes care standard are you responsible for?                         | 4.36            | 1.00        | 0.06        | 1.03           | 1.00                                            | 1.06        |
|                                                                          | Feet                                                                                      | (Intercept)     | 0.30        | 1.00        | 0.79           | 0.87                                            | 0.29        |
| I need more training in communication and negotiation skills             |                                                                                           | 4.98            | 1.00        | 0.05        | 1.11           | 1.01                                            | 1.22        |
| Diabetes goals and targets need to be tailored for people with SMI       |                                                                                           | 0.92            | 1.00        | 0.42        | 1.08           | 0.91                                            | 1.29        |
| <b>My patient's level of engagement is a key factor</b>                  |                                                                                           | <b>8.45</b>     | <b>1.00</b> | <b>0.01</b> | <b>1.21</b>    | <b>1.06</b>                                     | <b>1.38</b> |
| <b>How many of the 9 diabetes care standard are you responsible for?</b> |                                                                                           | <b>7.44</b>     | <b>1.00</b> | <b>0.02</b> | <b>1.09</b>    | <b>1.02</b>                                     | <b>1.16</b> |
| Profession                                                               |                                                                                           | 9.36            | 4.00        | 0.08        | -              | -                                               | -           |
| Mental health nurses and support workers                                 |                                                                                           | 4.69            | 1.00        | 0.07        | 0.70           | 0.50                                            | 0.98        |
| <b>Psychiatrists</b>                                                     |                                                                                           | <b>4.73</b>     | <b>1.00</b> | <b>0.04</b> | <b>0.68</b>    | <b>0.47</b>                                     | <b>0.97</b> |
| <b>GP</b>                                                                |                                                                                           | <b>5.36</b>     | <b>1.00</b> | <b>0.03</b> | <b>0.62</b>    | <b>0.42</b>                                     | <b>0.93</b> |
| Other nurses                                                             |                                                                                           | 1.30            | 1.00        | 0.27        | 0.85           | 0.64                                            | 1.13        |
| Cholesterol                                                              | <b>(Intercept)</b>                                                                        | <b>62.95</b>    | <b>1.00</b> | <b>0.00</b> | <b>4.83</b>    | <b>3.27</b>                                     | <b>7.12</b> |
|                                                                          | <b>Working with people with SMI scares me</b>                                             | <b>6.97</b>     | <b>1.00</b> | <b>0.01</b> | <b>0.90</b>    | <b>0.83</b>                                     | <b>0.97</b> |

| Outcome     | Predictors                                                                   | Hypothesis Test |             |             | Exp( $\beta$ ) | 95% Wald Confidence Interval for Exp( $\beta$ ) |             |
|-------------|------------------------------------------------------------------------------|-----------------|-------------|-------------|----------------|-------------------------------------------------|-------------|
|             |                                                                              | Wald $\chi^2$   | df          | <i>p</i>    |                | Lower                                           | Upper       |
|             | <b>My patient's level of engagement is a key factor</b>                      | <b>8.68</b>     | <b>1.00</b> | <b>0.00</b> | <b>1.14</b>    | <b>1.05</b>                                     | <b>1.25</b> |
| HbA1c       | <b>(Intercept)</b>                                                           | <b>6.57</b>     | <b>1.00</b> | <b>0.01</b> | <b>2.42</b>    | <b>1.23</b>                                     | <b>4.77</b> |
|             | Diabetes goals and targets need to be tailored for people with SMI           | 1.57            | 1.00        | 0.23        | 1.08           | 0.96                                            | 1.22        |
|             | <b>I am optimistic that I will be able to manage T2DM in people with SMI</b> | <b>9.16</b>     | <b>1.00</b> | <b>0.00</b> | <b>1.20</b>    | <b>1.06</b>                                     | <b>1.34</b> |
| Retinopathy | (Intercept)                                                                  | 0.34            | 1.00        | 0.59        | 1.79           | 0.24                                            | 13.35       |
|             | <b>Diabetes goals and targets need to be tailored for people with SMI</b>    | <b>5.55</b>     | <b>1.00</b> | <b>0.03</b> | <b>1.62</b>    | <b>1.08</b>                                     | <b>2.42</b> |
|             | <b>I would be disciplined if I did not manage T2DM in people with SMI</b>    | <b>6.14</b>     | <b>1.00</b> | <b>0.02</b> | <b>0.71</b>    | <b>0.53</b>                                     | <b>0.93</b> |
|             | <b>Incentives, such as CQUINS or QOF points, encourage me</b>                | <b>4.43</b>     | <b>1.00</b> | <b>0.04</b> | <b>0.77</b>    | <b>0.60</b>                                     | <b>0.98</b> |
|             | Family members and carers help me                                            | 2.05            | 1.00        | 0.16        | 1.22           | 0.93                                            | 1.60        |

### Education

The significant independent predictors of the number of people who were given general education about T2DM were knowledge about how to manage T2DM in people with SMI ( $p = 0.04$ ) and the degree to which diabetes care was part of their role ( $p < 0.001$ ).

### Weight

The significant independent predictors of the number of people who had advice about weight management were the degree to which diabetes care was part of their role ( $p = 0.02$ ) and profession ( $p < 0.001$ ).

### Diet and nutrition

Optimism about the health of their clients ( $p = 0.04$ ) was the only independent predictor of the number of people who were advised about diet and nutrition.

### Monitoring BP

The degree to which diabetes care was a routine part of their role ( $p = 0.04$ ) was the only independent predictor of the number of people who had their BP monitored.

### Examining feet

The degree to which diabetes care was part of their role ( $p = 0.02$ ), the level of engagement from the service user ( $p = 0.01$ ) and profession (psychiatrists  $p = 0.04$  and GPs  $p = 0.03$  compared with allied and other health professions) were the significant independent predictors of the number of people who had their feet examined.

### Agreeing a personalised HbA1c target and provide ongoing review

How optimistic a person was in their ability to manage T2DM in people with SMI ( $p < 0.001$ ) was the only independent predictor of the number of service users with whom HbA1c targets were set and ongoing reviews provided.

### Monitoring cholesterol

The level of engagement from the service user ( $p < 0.001$ ) and fear of SMI ( $p = 0.01$ ) were the independent predictors of the number of people who had their cholesterol monitored.

### Monitoring kidney function

There were no significant univariate associations between the number of people in whom kidney function was monitored and any of the demographic, occupational or TDF factors.

### Referring to retinopathy screening

The belief that goals and targets need to be tailored for people with SMI ( $p = 0.02$ ), that they would be disciplined for not managing T2DM in people with SMI ( $p = 0.03$ ) and the need for incentives to encourage them to manage T2DM in this population ( $p = 0.04$ ) were the significant independent predictors of the number of people referred on for retinopathy screening.

## DISCUSSION

We found that delivery of diabetes care for people with SMI is influenced by a range of individual and organisational factors. Although there were clear differences in the extent of involvement, mental health professionals noted active engagement in many of the aspects of diabetes care, as identified elsewhere in the literature.[14, 27, 15] Confirming our qualitative findings[16] however, specialist mental health clinicians reported being responsible for fewer diabetes care standards than primary care and specialist diabetes clinicians. This contests the idea that there is confusion and role ambiguity about the responsibility for monitoring and supporting T2DM in SMI.[13] In fact this



1  
2  
3 survey indicates clear boundaries, but when diabetes management is perceived to be a greater part  
4  
5 of a person's role, more service users are treated according to recommended standards. This clearly  
6  
7 reflects conflict between the shared care approach,[21, 20] which promotes mental health  
8  
9 professionals broadening their deliverer of to address physical and mental health.[19] This indicates  
10  
11 a need for NHS trusts to define roles and responsibilities more clearly. This is particularly relevant  
12  
13 given that only a third of the sample felt that there was a definite focus in their trust on the  
14  
15 management of T2DM in people with SMI.  
16  
17

18  
19 Although 54% of respondents had received training in diabetes, only a quarter had been trained in  
20  
21 how to manage the condition in people with SMI, and this figure did not differ between the  
22  
23 professions. Despite receiving training, those working in mental health settings felt less  
24  
25 knowledgeable about the guidelines for T2DM and had a desire for more training in how to manage  
26  
27 the condition. This supports the findings of studies conducted in other UK mental health trusts[28,  
28  
29 14, 27, 15, 29] and theory-driven qualitative work that formed the basis of this study.[16]  
30  
31 Importantly, this lack of knowledge and skills meant that healthcare professionals treated fewer  
32  
33 service users according to recommended diabetes care standards. Evaluations of diabetes training  
34  
35 and educational packages for mental health clinicians are limited. Improvements in understanding  
36  
37 and knowledge of diabetes have been reported; however, these findings are based on a small scale,  
38  
39 single group study consisting of primarily mental health students and hence fail to explore its impact  
40  
41 on practice.[30] Any such programme will need to consider the barriers to attending training of this  
42  
43 nature, including a lack of management support, staff shortages, the discretionary nature of  
44  
45 attending and lack of funding[31] along with the challenges of using psychosocial interventions to  
46  
47 change practice.[32, 33, 34]  
48  
49  
50  
51  
52

53 Being able to communicate and engage with service users was identified as an important facilitator  
54  
55 in delivering effective diabetes care. As opposed to those working in mental health settings, primary  
56  
57

1  
2  
3 care and diabetes specialists felt they needed more training in communication and negotiation skills  
4  
5 in order for them to be able to motivate their clients and deliver recommended care. Difficulties  
6  
7 motivating service users with diabetes to self-manage has been identified elsewhere in the  
8  
9 literature[27, 29, 35] and presents an ongoing challenge for interventions aimed at changing the  
10  
11 behaviour of service users with T2DM.[36] Respondents stressed the importance of tailoring  
12  
13 diabetes treatment, along with any goals and targets, to the needs and abilities of the service user.  
14  
15 Mental health staff report experiencing difficulties engaging service users in their diabetes care, due  
16  
17 to limitations in cognitive and executive functioning.[35, 29] Together this highlights the importance  
18  
19 of training healthcare professionals to also be able to identify suitable times within the service user's  
20  
21 journey when they may need more support in order for them to self-manage effectively. The  
22  
23 challenges of communicating and engaging service users in their care, may also be precipitated or be  
24  
25 a consequence of the fear some healthcare professionals experience about working with someone  
26  
27 with a SMI. This further supports research that shows some clinicians experience discomfort in  
28  
29 dealing with people with mental illness leading to physical diagnosis often being missed.[37]

30  
31  
32  
33  
34 Only a third of the sample were optimistic about the health of their clients with T2DM, and a  
35  
36 majority of respondents lacked optimism about their ability to manage T2DM in people with SMI.  
37  
38 This led to fewer service users receiving the recommended diabetes care standards. Given the  
39  
40 importance of hope and optimism in the process of personal recovery in mental health[17] this could  
41  
42 be an important focus for interventions aimed at improving diabetes care and outcomes for service  
43  
44 users, with the potential for wider benefits. The powerful position that healthcare professionals hold  
45  
46 as hope-inspiring role models[17] can either enhance or diminish the hope of service users.[38, 39]  
47  
48 This is particularly important considering that practitioner hope has been found to influence the  
49  
50 outcomes of therapy over and above client hope[40] and that cultivating hope in the context of  
51  
52 T2DM is also associated with increased adherence.[41]  
53  
54  
55  
56  
57  
58  
59  
60

1  
2  
3 Similar to the findings of our qualitative work[16] a third of respondents felt that they would be  
4 disciplined if they did not manage diabetes in people with SMI and approximately a quarter felt that  
5 incentives would encourage them. Despite this, the threat of discipline and need for incentives  
6 appeared to have a counterintuitive effect in the multivariate analysis. The greater the threat of  
7 discipline and a stronger belief that incentives would encourage them to manage diabetes, the fewer  
8 service users received recommended diabetes care. Suggesting that discipline and possibly the  
9 discordance between desire and receipt of incentives, was having a paralysing effect on practice.  
10  
11 Blame and punishment are felt by healthcare professionals to be part of health service culture,  
12 particularly when someone is involved in an error, near miss or incident.[42] This however can lead  
13 to disempowerment, disunity and a lack of compassion in the workforce.[43] Rather than allowing  
14 people to experiment without fear of reprisal and view errors as learning opportunities,[43] the  
15 workforce are fearful of personal accountability, litigation and complaints.[44] Although participants  
16 felt that incentives would improve their practice, the multivariate analysis and the evidence for pay-  
17 for-performance systems, such as QOF, in changing healthcare professional behaviour is limited and  
18 there is insufficient evidence for their impact on patient health outcomes.[45]

19  
20  
21  
22  
23  
24  
25  
26  
27  
28  
29  
30  
31  
32  
33  
34  
35  
36 Taken together, our findings suggest that a number of strategies could be implemented to improve  
37 the care offered to people with diabetes and SMI, and as a consequence address the inequalities  
38 experienced by this population. Identification of these barriers and enablers now allows us to  
39 identify, using established methods, the behaviour change techniques that should be employed  
40 within an intervention to improve diabetes care in people with SMI[46] and move towards the  
41 feasibility and piloting of a new approach to delivering care.[22] The study had a number of  
42 limitations; as with any online survey there are concerns about the representativeness of the  
43 sample.[47] There was a bias in responses towards those who were likely to be more interested in  
44 the topic, with significantly more responses from those working within mental health settings. This  
45 raises a broader question about whether severe mental illness is a priority or issue for diabetes

1  
2  
3 specialists. Despite the recruitment strategy aiming to target a range of healthcare professionals  
4  
5 GPs, diabetologists and physical health nurses are under-represented. The data from this study  
6  
7 focused on predicting delivery of diabetes care to people with SMI by healthcare professionals who  
8  
9 stated this was part of their role. It may have however, been the case that elements of diabetes care  
10  
11 could have been undertaken by someone even when it was not explicitly part of their role. Our  
12  
13 results are also only a snapshot of the experiences and beliefs of healthcare professionals; as the  
14  
15 care of diabetes in people with SMI becomes of greater priority and services begin to develop, these  
16  
17 views may change.  
18

### 19 20 **COMPETING INTERESTS**

21  
22 We have read and understood BMJ policy on declaration of interests and declare the following  
23  
24 interests: we have none.  
25  
26

### 27 28 **FUNDING**

29  
30 This work was supported by Barts Charity, grant number 477/2314.  
31  
32

### 33 34 **AUTHOR CONTRIBUTIONS**

35  
36 HM - made a substantial contribution to the conception and design of the study, the data analysis,  
37  
38 interpretation of the data, created a first draft of the manuscript, approved the final version and  
39  
40 agrees to be accountable for all aspects of the work.  
41

42  
43 FLG - made a substantial contribution to the conception and design of the study, collection and  
44  
45 interpretation of the data, commented on drafts of the manuscript, approved the final version and  
46  
47 agrees to be accountable for all aspects of the work.

48  
49 MH, AS, JC, JJ, CF and KM all made a substantial contribution to the conception and design of the  
50  
51 study, interpretation of the data, commented on drafts of the manuscript, approved the final version  
52  
53 and agree to be accountable for all aspects of the work.  
54

### 55 56 **DATA SHARING**

There is no other additional unpublished data to be shared.

## REFERENCE LIST

- 1 International Diabetes Federation. International Diabetes Federation Diabetes Atlas 7th edition. 2015.
- 2 Osborn DP, Wright CA, Levy G et al. Relative risk of diabetes, dyslipidaemia, hypertension and the metabolic syndrome in people with severe mental illnesses: systematic review and metaanalysis. *BMC Psychiatry* 2008;8:84.
- 3 De Hert M, Dekker JM, Wood D et al. Cardiovascular disease and diabetes in people with severe mental illness position statement from the European Psychiatric Association (EPA), supported by the European Association for the Study of Diabetes (EASD) and the European Society of Cardiology (ESC). *Eur Psychiatry* 2009;24:412-24.
- 4 Alvarez-Jimenez M, Hetrick SE, Gonzalez-Blanch C et al. Non-pharmacological management of antipsychotic-induced weight gain: systematic review and meta-analysis of randomised controlled trials. *Br J Psychiatry* 2008;193:101-7.
- 5 Lawrence D, Mitrou F, and Zubrick SR. Smoking and mental illness: results from population surveys in Australia and the United States. *BMC Public Health* 2009;9:285.
- 6 Vinogradova Y, Coupland C, Hippisley-Cox J et al. Effects of severe mental illness on survival of people with diabetes. *Br J Psychiatry* 2010;197:272-7.
- 7 Becker T and Hux J. Risk of acute complications of diabetes among people with schizophrenia in Ontario, Canada. *Diabetes Care* 2011;34:398-402.
- 8 McGinty EE, Baller J, Azrin ST et al. Quality of medical care for persons with serious mental illness: A comprehensive review. *Schizophr Res* 2015;165:227-35.
- 9 Scott D, Platania-Phung C, and Happell B. Quality of Care for Cardiovascular Disease and Diabetes Amongst Individuals with Serious Mental Illness and Those Using Antipsychotic Medications. *J Healthc Qual* 2012;34:15-21.

- 1  
2  
3 10 Rathmann W, Pscherer S, Konrad M et al. Diabetes treatment in people with type 2 diabetes and  
4 schizophrenia: Retrospective primary care database analyses. *Prim Care Diabetes* 2016;10:36-40.  
5  
6  
7 11 Mathur R, Hull SA, Boomla K et al. Ethnic differences in primary care management of diabetes  
8 and cardiovascular disease in people with serious mental illness. *Br J Gen Pract* 2012;62:e582-e588.  
9  
10  
11 12 Mitchell AJ, Malone D, and Carney Doebbeling C. Quality of medical care for people with and  
12 without comorbid mental illness and substance misuse: systematic review of comparative studies.  
13 The *Br J Psychiatry* 2009;194:491-9.  
14  
15  
16  
17 13 Robson D and Haddad M. Mental health nurses' attitudes towards the physical health care of  
18 people with severe and enduring mental illness: the development of a measurement tool. *Int J Nurs*  
19 *Stud* 2012;49:72-83.  
20  
21  
22  
23  
24 14 Nash M. Mental health nurses' diabetes care skills - a training needs analysis. *Br J Nurs*  
25 2009;18:628-30.  
26  
27  
28 15 Howard L and Gamble C. Supporting mental health nurses to address the physical health needs of  
29 people with serious mental illness in acute inpatient care settings. *J Psychiatr Ment Health Nurs*  
30 2011;18:105-12.  
31  
32  
33  
34 16 McBain H, Mulligan K, Lamontagne-Godwin F et al. Implementation of recommended type 2  
35 diabetes care for people with severe mental illness - a qualitative exploration with healthcare  
36 professionals. *BMC Psychiatry* 2016;Jul 8;16:222.  
37  
38  
39  
40 17 Leamy M, Bird V, Le BC et al. Conceptual framework for personal recovery in mental health:  
41 systematic review and narrative synthesis. *Br J Psychiatry* 2011;199:445-52.  
42  
43  
44  
45 18 Kilbourne AM, Pirraglia PA, Lai Z et al. Quality of general medical care among patients with  
46 serious mental illness: does colocation of services matter? *Psychiatr Serv* 2011;62:922-8.  
47  
48  
49 19 World Health Organization. Mental Health Action Plan 2013-2020. 2013.  
50  
51 20 NHS Diabetes. Commissioning Mental Health and Diabetes Services. 2011.  
52  
53 21 National Institute for Health and Care Excellence. Psychosis and schizophrenia in adults:  
54 prevention and management. 2014.  
55  
56  
57  
58  
59  
60

- 1  
2  
3 22 Craig P, Dieppe P, Macintyre S et al. Developing and evaluating complex interventions: the new  
4  
5 Medical Research Council guidance. *BMJ* 2008;337.  
6  
7 23 General Medical Council. List of Registered Medical Practitioners - statistics. 2017.  
8  
9 24 NHS Digital. Provisional NHS Hospital & Community Health Service (HCHS) monthly workforce  
10  
11 statistics. 2017.  
12  
13 25 Gosden C, James J, Anderson U et al. UK workforce survey of DSNs and nurse consultants. *J*  
14  
15 *Diabetes Nurs* 2010;14:250-7.  
16  
17 26 National Institute for Health and Care Excellence. Diabetes in adults (QS6). 2011.  
18  
19 27 Robson D, Haddad M, Gray R et al. Mental health nursing and physical health care: A  
20  
21 cross-sectional study of nurses' attitudes, practice, and perceived training needs for the physical  
22  
23 health care of people with severe mental illness. *Int J Mental Health Nurses* 2013;22:409-17.  
24  
25 28 Ward D. Improving physical health care in a mental health trust. *Nurs Times* 2005;101:32-3.  
26  
27 29 Hultsjö S. Mental healthcare staff's knowledge and experiences of diabetes care for persons with  
28  
29 psychosis: a qualitative interview study. *Prim Health Care Res Dev* 2013;14:281-92.  
30  
31 30 Hemingway S, Trotter F, Stephenson J et al. Diabetes: increasing the knowledge base of mental  
32  
33 health nurses. *Br J Nurs* 2013;22:991-6.  
34  
35 31 Nash M. Physical care skills: a training needs analysis of inpatient and community mental health  
36  
37 nurses. *Mental Health Practice* 2005;9:20-3.  
38  
39 32 Brooker C and Brabban A. Effective training in psychosocial interventions for work with people  
40  
41 with serious mental health problems. *Mental Health Rev* 2017;11:7-14.  
42  
43 33 Stanbridge RI and Burbach FR. Enhancing working partnerships with carers and families: a  
44  
45 strategy and associated training programme. *Mental Health Rev* 2004;9:32-7.  
46  
47 34 Slade M, Bird V, Clarke E et al. Supporting recovery in patients with psychosis using adult mental  
48  
49 health teams (REFOCUS): a multi-site cluster randomised controlled trial. *Lancet Psychiatry*  
50  
51 2015;2:503-14.  
52  
53  
54  
55  
56  
57  
58  
59  
60

- 1  
2  
3 35 Hultsjö S and Hjelm K. Community health-care staff's experiences of support to prevent type 2  
4 diabetes among people with psychosis: An interview study with health staff. *Int J Mental Health*  
5 *Nurses* 2012;21:480-9.  
6  
7  
8  
9 36 McBain H, Mulligan K, Haddad M et al. Self management interventions for type 2 diabetes in  
10 adult people with severe mental illness. *Cochrane Database Syst Rev* 2016;4:CD011361.  
11  
12  
13 37 Jones S, Howard L, and Thornicroft G. Diagnostic overshadowing!: worse physical health care for  
14 people with mental illness. *Acta Psychiatr Scand* 2008;118:169-71.  
15  
16  
17 38 Hobbs M and Baker M. Hope for recovery - how clinicians may facilitate this in their work. *J Ment*  
18 *Health* 2012;21:144-53.  
19  
20  
21 39 Niebieszczanski RJ, Dent H, and McGowan A. 'Your personality is the intervention': a grounded  
22 theory of mental health nurses' beliefs about hope and experiences of fostering hope within a  
23 secure setting. *J Forens Psychiatry Psychol* 2016;27:419-42.  
24  
25  
26  
27 40 Coppock TE, Owen JJ, Zagarskas E et al. The relationship between therapist and client hope with  
28 therapy outcomes. *Psychother Res* 2010;20:619-26.  
29  
30  
31  
32 41 Makarem SC, Smith MF, Mudambi SM et al. Why People Do Not Always Follow the Doctor's  
33 Orders: The Role of Hope and Perceived Control. *J Consum Aff* 2014;48:457-85.  
34  
35  
36 42 Dixon-Woods M, Baker R, Charles K et al. Culture and behaviour in the English National Health  
37 Service: overview of lessons from a large multimethod study. *BMJ Qual Saf* 2013;23:106-15.  
38  
39  
40 43 de Zulueta PC. Developing compassionate leadership in health care: an integrative review. *J*  
41 *Healthc Leadersh* 2016;8:1-10.  
42  
43  
44 44 Goodman B. Risk, rationality and learning for compassionate care; The link between management  
45 practices and the 'lifeworld' of nursing. *Nurse Educ Today* 2014;34:1265-8.  
46  
47  
48 45 Mendelson A, Kondo K, Damberg C et al. The Effects of Pay-for-Performance Programs on Health,  
49 Health Care Use, and Processes of Care. *Ann Intern Med* 2017;166:341-53.  
50  
51  
52  
53  
54  
55  
56  
57  
58  
59  
60



1  
2  
3  
4  
5  
6  
7  
8  
9  
10  
11  
12  
13  
14  
15  
16  
17  
18  
19  
20  
21  
22  
23  
24  
25  
26  
27  
28  
29  
30  
31  
32  
33  
34  
35  
36  
37  
38  
39  
40  
41  
42  
43  
44  
45  
46  
47  
48  
49  
50  
51  
52  
53  
54  
55  
56  
57  
58  
59  
60

46 Cane J, Richardson M, Johnston M et al. From lists of behaviour change techniques (BCTs) to structured hierarchies: Comparison of two methods of developing a hierarchy of BCTs. *Br J Health Psychol* 2015;20:130-50.

47 Whitehead LC. Methodological and ethical issues in Internet-mediated research in the field of health: an integrated review of the literature. *Soc Sci Med* 2007;65:782-91.

For peer review only

## Supplementary File A.

### Questionnaire to Measures the Barriers and Enablers to Delivering Diabetes Care in People with SMI (*TDF domain*)

|    |                                                                                                                                                                  |                             |                          |
|----|------------------------------------------------------------------------------------------------------------------------------------------------------------------|-----------------------------|--------------------------|
| 11 | I know the guidelines, national or local, for managing type 2 diabetes ( <i>knowledge</i> )                                                                      | Strong Agree                | <input type="checkbox"/> |
| 12 |                                                                                                                                                                  | Agree                       | <input type="checkbox"/> |
| 13 |                                                                                                                                                                  | Neither Agree nor Disagree  | <input type="checkbox"/> |
| 14 |                                                                                                                                                                  | Disagree                    | <input type="checkbox"/> |
| 15 |                                                                                                                                                                  | Strongly Disagree           | <input type="checkbox"/> |
| 20 | I know how to manage type 2 diabetes in people with SMI ( <i>knowledge</i> )                                                                                     | Strong Agree                | <input type="checkbox"/> |
| 21 |                                                                                                                                                                  | Agree                       | <input type="checkbox"/> |
| 22 |                                                                                                                                                                  | Neither Agree nor Disagree  | <input type="checkbox"/> |
| 23 |                                                                                                                                                                  | Disagree                    | <input type="checkbox"/> |
| 24 |                                                                                                                                                                  | Strongly Disagree           | <input type="checkbox"/> |
| 30 | How likely is it that you will follow the NICE diabetes guidelines for your patients who have type 2 diabetes and SMI? ( <i>intention</i> )                      | Very Likely                 | <input type="checkbox"/> |
| 31 |                                                                                                                                                                  | Likely                      | <input type="checkbox"/> |
| 32 |                                                                                                                                                                  | Neither Likely nor Unlikely | <input type="checkbox"/> |
| 33 |                                                                                                                                                                  | Unlikely                    | <input type="checkbox"/> |
| 34 |                                                                                                                                                                  | Very Unlikely               | <input type="checkbox"/> |
| 40 | I have access to people with specialist diabetes knowledge to help me manage type 2 diabetes in people with SMI ( <i>environmental context &amp; resources</i> ) | Strong Agree                | <input type="checkbox"/> |
| 41 |                                                                                                                                                                  | Agree                       | <input type="checkbox"/> |
| 42 |                                                                                                                                                                  | Neither Agree nor Disagree  | <input type="checkbox"/> |
| 43 |                                                                                                                                                                  | Disagree                    | <input type="checkbox"/> |
| 44 |                                                                                                                                                                  | Strongly Disagree           | <input type="checkbox"/> |
| 49 | I have access to people in primary care services for my patients with type 2 diabetes and SMI ( <i>environmental context &amp; resources</i> )                   | Strong Agree                | <input type="checkbox"/> |
| 50 |                                                                                                                                                                  | Agree                       | <input type="checkbox"/> |
| 51 |                                                                                                                                                                  | Neither Agree nor Disagree  | <input type="checkbox"/> |
| 52 |                                                                                                                                                                  | Disagree                    | <input type="checkbox"/> |
| 53 |                                                                                                                                                                  | Strongly Disagree           | <input type="checkbox"/> |

1  
2  
3  
4  
5  
6  
7  
8  
9  
10  
11  
12  
13  
14  
15  
16  
17  
18  
19  
20  
21  
22  
23  
24  
25  
26  
27  
28  
29  
30  
31  
32  
33  
34  
35  
36  
37  
38  
39  
40  
41  
42  
43  
44  
45  
46  
47  
48  
49  
50  
51  
52  
53  
54  
55  
56  
57  
58  
59  
60

I have access to people in mental health services for my patients with type 2 diabetes and SMI (*environmental context & resources*)

- Strong Agree
- Agree
- Neither Agree nor Disagree
- Disagree
- Strongly Disagree

I have enough time to manage type 2 diabetes in people with SMI (*environmental context & resources*)

- Strong Agree
- Agree
- Neither Agree nor Disagree
- Disagree
- Strongly Disagree

More integrated IT systems would make it easier for me to manage type 2 diabetes in people with SMI (*environmental context & resources*)

- Strong Agree
- Agree
- Neither Agree nor Disagree
- Disagree
- Strongly Disagree

I need more training in communication and negotiation skills in order to manage type 2 diabetes in people with SMI (*skills*)

- Strong Agree
- Agree
- Neither Agree nor Disagree
- Disagree
- Strongly Disagree

I need more training in diabetes in order to manage type 2 diabetes in people with SMI (*skills*)

- Strong Agree
- Agree
- Neither Agree nor Disagree
- Disagree
- Strongly Disagree

|    |                                                                        |                            |                          |
|----|------------------------------------------------------------------------|----------------------------|--------------------------|
| 1  |                                                                        |                            |                          |
| 2  |                                                                        |                            |                          |
| 3  | Managing patients' type 2 diabetes in people with SMI is as            | Strong Agree               | <input type="checkbox"/> |
| 4  | important as managing their mental health ( <i>goal</i> )              | Agree                      | <input type="checkbox"/> |
| 5  |                                                                        | Neither Agree nor Disagree | <input type="checkbox"/> |
| 6  |                                                                        | Disagree                   | <input type="checkbox"/> |
| 7  |                                                                        | Strongly Disagree          | <input type="checkbox"/> |
| 8  |                                                                        |                            |                          |
| 9  |                                                                        |                            |                          |
| 10 |                                                                        |                            |                          |
| 11 |                                                                        |                            |                          |
| 12 | Diabetes goals and targets need to be tailored for people with         | Strong Agree               | <input type="checkbox"/> |
| 13 | SMI ( <i>goal</i> )                                                    | Agree                      | <input type="checkbox"/> |
| 14 |                                                                        | Neither Agree nor Disagree | <input type="checkbox"/> |
| 15 |                                                                        | Disagree                   | <input type="checkbox"/> |
| 16 |                                                                        | Strongly Disagree          | <input type="checkbox"/> |
| 17 |                                                                        |                            |                          |
| 18 |                                                                        |                            |                          |
| 19 |                                                                        |                            |                          |
| 20 |                                                                        |                            |                          |
| 21 |                                                                        |                            |                          |
| 22 | There is a definite focus in my trust on managing type 2               | Strong Agree               | <input type="checkbox"/> |
| 23 | diabetes in people with SMI ( <i>goal</i> )                            | Agree                      | <input type="checkbox"/> |
| 24 |                                                                        | Neither Agree nor Disagree | <input type="checkbox"/> |
| 25 |                                                                        | Disagree                   | <input type="checkbox"/> |
| 26 |                                                                        | Strongly Disagree          | <input type="checkbox"/> |
| 27 |                                                                        |                            |                          |
| 28 |                                                                        |                            |                          |
| 29 |                                                                        |                            |                          |
| 30 |                                                                        |                            |                          |
| 31 | I prioritise management of mental health over management of            | Strong Agree               | <input type="checkbox"/> |
| 32 | type 2 diabetes in people with type 2 diabetes and SMI ( <i>goal</i> ) | Agree                      | <input type="checkbox"/> |
| 33 |                                                                        | Neither Agree nor Disagree | <input type="checkbox"/> |
| 34 |                                                                        | Disagree                   | <input type="checkbox"/> |
| 35 |                                                                        | Strongly Disagree          | <input type="checkbox"/> |
| 36 |                                                                        |                            |                          |
| 37 |                                                                        |                            |                          |
| 38 |                                                                        |                            |                          |
| 39 |                                                                        |                            |                          |
| 40 |                                                                        |                            |                          |
| 41 | I am optimistic that I will be able to manage type 2 diabetes in       | Strong Agree               | <input type="checkbox"/> |
| 42 | people with SMI ( <i>optimism</i> )                                    | Agree                      | <input type="checkbox"/> |
| 43 |                                                                        | Neither Agree nor Disagree | <input type="checkbox"/> |
| 44 |                                                                        | Disagree                   | <input type="checkbox"/> |
| 45 |                                                                        | Strongly Disagree          | <input type="checkbox"/> |
| 46 |                                                                        |                            |                          |
| 47 |                                                                        |                            |                          |
| 48 |                                                                        |                            |                          |
| 49 |                                                                        |                            |                          |
| 50 |                                                                        |                            |                          |
| 51 |                                                                        |                            |                          |
| 52 |                                                                        |                            |                          |
| 53 |                                                                        |                            |                          |
| 54 |                                                                        |                            |                          |
| 55 |                                                                        |                            |                          |
| 56 |                                                                        |                            |                          |
| 57 |                                                                        |                            |                          |
| 58 |                                                                        |                            |                          |
| 59 |                                                                        |                            |                          |
| 60 |                                                                        |                            |                          |

1  
2  
3  
4  
5  
6  
7  
8  
9  
10  
11  
12  
13  
14  
15  
16  
17  
18  
19  
20  
21  
22  
23  
24  
25  
26  
27  
28  
29  
30  
31  
32  
33  
34  
35  
36  
37  
38  
39  
40  
41  
42  
43  
44  
45  
46  
47  
48  
49  
50  
51  
52  
53  
54  
55  
56  
57  
58  
59  
60

I feel optimistic about the health of my patients with type 2 diabetes and SMI (*optimism*)

Strong Agree

Agree

Neither Agree nor Disagree

Disagree

Strongly Disagree

I would be disciplined if I did not manage type 2 diabetes in people with SMI (*reinforcement*)

Strong Agree

Agree

Neither Agree nor Disagree

Disagree

Strongly Disagree

Incentives, such as CQUINS or QOF points, encourage me to manage type 2 diabetes in people with SMI (*reinforcement*)

Strong Agree

Agree

Neither Agree nor Disagree

Disagree

Strongly Disagree

Managing type 2 diabetes in someone with SMI is a routine part of my job (*memory, attention and decision*)

Strong Agree

Agree

Neither Agree nor Disagree

Disagree

Strongly Disagree

I tailor the treatment of type 2 diabetes in people with SMI depending on their needs (*memory, attention and decision*)

Strong Agree

Agree

Neither Agree nor Disagree

Disagree

Strongly Disagree

|    |                                                                       |                            |                          |
|----|-----------------------------------------------------------------------|----------------------------|--------------------------|
| 1  |                                                                       |                            |                          |
| 2  |                                                                       |                            |                          |
| 3  | Managing type 2 diabetes in people with SMI worries or                | Strong Agree               | <input type="checkbox"/> |
| 4  | concerns me ( <i>emotion</i> )                                        | Agree                      | <input type="checkbox"/> |
| 5  |                                                                       | Neither Agree nor Disagree | <input type="checkbox"/> |
| 6  |                                                                       | Disagree                   | <input type="checkbox"/> |
| 7  |                                                                       | Strongly Disagree          | <input type="checkbox"/> |
| 8  |                                                                       |                            |                          |
| 9  |                                                                       |                            |                          |
| 10 |                                                                       |                            |                          |
| 11 |                                                                       |                            |                          |
| 12 | Managing type 2 diabetes in people with SMI frustrates me             | Strong Agree               | <input type="checkbox"/> |
| 13 | ( <i>emotion</i> )                                                    | Agree                      | <input type="checkbox"/> |
| 14 |                                                                       | Neither Agree nor Disagree | <input type="checkbox"/> |
| 15 |                                                                       | Disagree                   | <input type="checkbox"/> |
| 16 |                                                                       | Strongly Disagree          | <input type="checkbox"/> |
| 17 |                                                                       |                            |                          |
| 18 |                                                                       |                            |                          |
| 19 |                                                                       |                            |                          |
| 20 |                                                                       |                            |                          |
| 21 |                                                                       |                            |                          |
| 22 | Working with people with SMI scares me ( <i>emotion</i> )             | Strong Agree               | <input type="checkbox"/> |
| 23 |                                                                       | Agree                      | <input type="checkbox"/> |
| 24 |                                                                       | Neither Agree nor Disagree | <input type="checkbox"/> |
| 25 |                                                                       | Disagree                   | <input type="checkbox"/> |
| 26 |                                                                       | Strongly Disagree          | <input type="checkbox"/> |
| 27 |                                                                       |                            |                          |
| 28 |                                                                       |                            |                          |
| 29 |                                                                       |                            |                          |
| 30 |                                                                       |                            |                          |
| 31 | My patient's level of engagement is a key factor in how I             | Strong Agree               | <input type="checkbox"/> |
| 32 | manage the type 2 diabetes in people with SMI ( <i>social</i>         | Agree                      | <input type="checkbox"/> |
| 33 | <i>influence</i> )                                                    | Neither Agree nor Disagree | <input type="checkbox"/> |
| 34 |                                                                       | Disagree                   | <input type="checkbox"/> |
| 35 |                                                                       | Strongly Disagree          | <input type="checkbox"/> |
| 36 |                                                                       |                            |                          |
| 37 |                                                                       |                            |                          |
| 38 |                                                                       |                            |                          |
| 39 |                                                                       |                            |                          |
| 40 |                                                                       |                            |                          |
| 41 | I work as part of a team of healthcare professionals to help          | Strong Agree               | <input type="checkbox"/> |
| 42 | manage type 2 diabetes in people with SMI ( <i>social influence</i> ) | Agree                      | <input type="checkbox"/> |
| 43 |                                                                       | Neither Agree nor Disagree | <input type="checkbox"/> |
| 44 |                                                                       | Disagree                   | <input type="checkbox"/> |
| 45 |                                                                       | Strongly Disagree          | <input type="checkbox"/> |
| 46 |                                                                       |                            |                          |
| 47 |                                                                       |                            |                          |
| 48 |                                                                       |                            |                          |
| 49 |                                                                       |                            |                          |
| 50 |                                                                       |                            |                          |
| 51 |                                                                       |                            |                          |
| 52 |                                                                       |                            |                          |
| 53 |                                                                       |                            |                          |
| 54 |                                                                       |                            |                          |
| 55 |                                                                       |                            |                          |
| 56 |                                                                       |                            |                          |
| 57 |                                                                       |                            |                          |
| 58 |                                                                       |                            |                          |
| 59 |                                                                       |                            |                          |
| 60 |                                                                       |                            |                          |

1  
2  
3  
4  
5  
6  
7  
8  
9  
10  
11  
12  
13  
14  
15  
16  
17  
18  
19  
20  
21  
22  
23  
24  
25  
26  
27  
28  
29  
30  
31  
32  
33  
34  
35  
36  
37  
38  
39  
40  
41  
42  
43  
44  
45  
46  
47  
48  
49  
50  
51  
52  
53  
54  
55  
56  
57  
58  
59  
60

|                                                                                                                                                   |                            |                          |
|---------------------------------------------------------------------------------------------------------------------------------------------------|----------------------------|--------------------------|
| Family members and carers help me manage type 2 diabetes in people with SMI ( <i>social influence</i> )                                           | Strong Agree               | <input type="checkbox"/> |
|                                                                                                                                                   | Agree                      | <input type="checkbox"/> |
|                                                                                                                                                   | Neither Agree nor Disagree | <input type="checkbox"/> |
|                                                                                                                                                   | Disagree                   | <input type="checkbox"/> |
|                                                                                                                                                   | Strongly Disagree          | <input type="checkbox"/> |
| I feel confident about managing type 2 diabetes in people with SMI ( <i>beliefs about capabilities</i> )                                          | Strong Agree               | <input type="checkbox"/> |
|                                                                                                                                                   | Agree                      | <input type="checkbox"/> |
|                                                                                                                                                   | Neither Agree nor Disagree | <input type="checkbox"/> |
|                                                                                                                                                   | Disagree                   | <input type="checkbox"/> |
|                                                                                                                                                   | Strongly Disagree          | <input type="checkbox"/> |
| Poorly controlled type 2 diabetes in people with SMI affects their mental health ( <i>beliefs about consequences</i> )                            | Strong Agree               | <input type="checkbox"/> |
|                                                                                                                                                   | Agree                      | <input type="checkbox"/> |
|                                                                                                                                                   | Neither Agree nor Disagree | <input type="checkbox"/> |
|                                                                                                                                                   | Disagree                   | <input type="checkbox"/> |
|                                                                                                                                                   | Strongly Disagree          | <input type="checkbox"/> |
| If I didn't take steps to manage type 2 diabetes in people with SMI, they would come to serious harm ( <i>beliefs about consequences</i> )        | Strong Agree               | <input type="checkbox"/> |
|                                                                                                                                                   | Agree                      | <input type="checkbox"/> |
|                                                                                                                                                   | Neither Agree nor Disagree | <input type="checkbox"/> |
|                                                                                                                                                   | Disagree                   | <input type="checkbox"/> |
|                                                                                                                                                   | Strongly Disagree          | <input type="checkbox"/> |
| I have a plan that I follow - either in my team or on my own - when managing type 2 diabetes in people with SMI ( <i>behavioural regulation</i> ) | Strong Agree               | <input type="checkbox"/> |
|                                                                                                                                                   | Agree                      | <input type="checkbox"/> |
|                                                                                                                                                   | Neither Agree nor Disagree | <input type="checkbox"/> |
|                                                                                                                                                   | Disagree                   | <input type="checkbox"/> |
|                                                                                                                                                   | Strongly Disagree          | <input type="checkbox"/> |

1  
2  
3 I review how I manage type 2 diabetes in people with SMI, and identify ways in which I can improve (*behavioural regulation*) Strongly Agree   
4 Agree   
5 Neither Agree nor Disagree   
6 Disagree   
7 Strongly Disagree   
8  
9  
10

11  
12 Is providing general education about type 2 diabetes part of your clinical role? (*social professional role & identity*) Yes   
13 No   
14

15 *If yes, over the past 12 months, given 10 patients with both*  
16 *type 2 diabetes and SMI, for how many did you provide*  
17 *general education about diabetes?*   
18

19  
20 Is giving advice about weight management to patients with both type 2 diabetes and SMI part of your clinical role? (*social professional role & identity*) Yes   
21 No   
22

23 *If yes, over the past 12 months, given 10 patients with both*  
24 *type 2 diabetes and SMI, for how many did you advise*  
25 *about weight management?*   
26

27  
28 Is providing personalised advice about diet and nutrition to patients with type 2 diabetes and SMI part of your clinical role? (*social professional role & identity*) Yes   
29 No   
30

31 *If yes, over the past 12 months, given 10 patients with both*  
32 *type 2 diabetes and SMI, for how many did you advise*  
33 *about diet and nutrition?*   
34

35  
36 Is monitoring the blood pressure for patients with type 2 diabetes and SMI a part of your role? (*social professional role & identity*) Yes   
37 No   
38

39 *If yes, over the past 12 months, given 10 patients with both*  
40 *type 2 diabetes and SMI, for how many did you monitor*  
41 *their BP?*   
42

43  
44 Is examining the circulation and sensation in the feet of patients with type 2 diabetes and SMI part of your clinical role? (*social professional role & identity*) Yes   
45 No   
46

47 *If yes, over the past 12 months, given 10 patients with both*  
48 *type 2 diabetes and SMI, for how many did you examine*  
49 *their feet?*   
50

51  
52 Is working with patients with type 2 diabetes and SMI to agree a personalised HbA1c target and provide ongoing reviews a part of your clinical role? (*social professional role & identity*) Yes   
53 No   
54  
55  
56  
57  
58  
59



1  
2  
3  
4  
5  
6  
7  
8  
9  
10  
11  
12  
13  
14  
15  
16  
17  
18  
19  
20  
21  
22  
23  
24  
25  
26  
27  
28  
29  
30  
31  
32  
33  
34  
35  
36  
37  
38  
39  
40  
41  
42  
43  
44  
45  
46  
47  
48  
49  
50  
51  
52  
53  
54  
55  
56  
57  
58  
59  
60

*If yes, over the past 12 months, given 10 patients with both type 2 diabetes and SMI, for how many did you agree a personalised HbA1c target and provide ongoing reviews?*

Is working with patients with type 2 diabetes and SMI to monitor their cholesterol part of your clinical role? (*social professional role & identity*)

Yes

No

*If yes, over the past 12 months, given 10 patients with both type 2 diabetes and SMI, for how many did you monitor cholesterol?*

Is working with patients with type 2 diabetes and SMI to monitor their kidney function part of your clinical role? (*social professional role & identity*)

Yes

No

*If yes, over the past 12 months, given 10 patients with both type 2 diabetes and SMI, for how many did you monitor kidney function?*

Is working with patients with type 2 diabetes and SMI to refer to retinopathy screening a part of your clinical role? (*social professional role & identity*)

Yes

No

*If yes, over the past 12 months, given 10 patients with both type 2 diabetes and SMI, for how many did you refer to retinopathy screening?*

## Supplementary File A.

## Differences between professions on the barriers and enablers to delivering care

|                                                              | Mental Health Nurse (n = 124) | Psychiatrist (n=108) | GP (n=29)  | Other Nurses (n=60) | Allied Health Professionals (n=37) | Diabetologist or Endocrinologist (n=11) | ANOVA                                                 |
|--------------------------------------------------------------|-------------------------------|----------------------|------------|---------------------|------------------------------------|-----------------------------------------|-------------------------------------------------------|
| I know the guidelines                                        | 3.31(1.08)                    | 3.11(1.04)           | 4.13(0.76) | 3.95(1.15)          | 3.10(1.14)                         | 4.54(0.63)                              | F (5, 50.63) = 24.78, $p < 0.001$ , $\omega^2 = 0.23$ |
| I know how to manage                                         | 3.41(0.98)                    | 3.08(0.94)           | 3.42(0.91) | 3.13(1.06)          | 2.81(1.17)                         | 3.83(0.87)                              | F (5, 267) = 4.34, $p = 0.01$ , $\eta^2 = 0.08$       |
| I will follow the NICE diabetes guidelines                   | 3.80(0.99)                    | 3.67(0.94)           | 3.85(1.00) | 3.85(1.09)          | 3.38(1.21)                         | 3.73(1.06)                              | F (5, 267) = 1.46, $p = 0.21$ , $\eta^2 = 0.03$       |
| I have access to people with specialist diabetes knowledge   | 3.62(1.07)                    | 3.72(1.09)           | 3.88(0.82) | 3.80(1.10)          | 3.27(1.12)                         | 3.75(1.25)                              | F (5, 48.68) = 2.14, $p = 0.08$ , $\omega^2 = 0.02$   |
| I have access to people in primary care services             | 3.61(1.07)                    | 3.68(1.08)           | 3.82(1.21) | 3.27(1.25)          | 3.39(1.25)                         | 3.42(1.19)                              | F (5, 267) = 2.18, $p = 0.06$ , $\eta^2 = 0.04$       |
| I have access to people in mental health services            | 3.57(1.11)                    | 3.30(1.29)           | 3.12(1.16) | 3.31(1.19)          | 3.14(1.36)                         | 3.29(1.10)                              | F (5, 48.04) = 1.43, $p = 0.23$ , $\omega^2 = 0.01$   |
| I have enough time                                           | 3.10(1.02)                    | 2.74(1.04)           | 2.48(1.02) | 3.07(1.10)          | 2.84(1.20)                         | 2.59(1.11)                              | F (5, 267) = 3.12, $p = 0.009$ , $\eta^2 = 0.009$     |
| More integrated IT systems would make it easier for me       | 3.72(1.05)                    | 3.72(1.18)           | 3.33(1.06) | 3.40(1.02)          | 3.48(1.34)                         | 3.97(0.95)                              | F (5, 267) = 2.38, $p = 0.04$ , $\eta^2 = 0.04$       |
| I need more training in communication and negotiation skills | 3.07(1.12)                    | 2.75(1.12)           | 3.05(1.17) | 3.33(1.11)          | 3.20(1.41)                         | 3.64(1.22)                              | F (5, 46.14) = 5.73, $p < 0.001$ , $\omega^2 = 0.08$  |
| I need more training in diabetes                             | 3.64(1.10)                    | 3.61(1.13)           | 3.18(1.04) | 3.44(1.09)          | 3.79(1.28)                         | 3.21(1.36)                              | F (5, 267) = 4.18, $p = 0.001$ , $\eta^2 = 0.07$      |

|                                                                                  | Mental Health Nurse (n = 124) | Psychiatrist (n=108) | GP (n=29)  | Other Nurses (n=60) | Allied Health Professionals (n=37) | Diabetologist or Endocrinologist (n=11) | ANOVA                                                      |
|----------------------------------------------------------------------------------|-------------------------------|----------------------|------------|---------------------|------------------------------------|-----------------------------------------|------------------------------------------------------------|
| Managing T2DM in people with SMI is as important as managing their mental health | 4.31(0.86)                    | 4.16(0.87)           | 4.07(0.91) | 4.18(0.90)          | 4.21(1.17)                         | 4.14(1.00)                              | F (5, 267) = 2.47, <b>p = 0.03</b> , $\eta^2 = \text{xxx}$ |
| Diabetes goals and targets need to be tailored for people with SMI               | 4.06(0.94)                    | 3.86(0.93)           | 4.17(0.92) | 4.21(0.97)          | 4.09(1.18)                         | 4.62(0.62)                              | F (5, 267) = 3.57, <b>p = 0.004</b> , $\eta^2 = 0.06$      |
| There is a definite focus in my trust                                            | 3.22(1.01)                    | 3.05(1.00)           | 2.50(0.92) | 3.10(1.16)          | 3.07(1.19)                         | 3.17(1.33)                              | F (5, 267) = 3.97, <b>p = 0.002</b> , $\eta^2 = 0.07$      |
| I prioritise management of mental health over management of T2DM                 | 2.79(1.02)                    | 2.65(1.09)           | 2.76(0.80) | 3.00(0.91)          | 2.96(1.18)                         | 3.03(1.06)                              | F (5, 46.84) = 2.30, $p = 0.06$ , $\omega^2 = 0.02$        |
| I am optimistic that I will be able to manage T2DM in people with SMI            | 3.45(0.91)                    | 3.18(0.98)           | 3.52(0.80) | 3.39(0.93)          | 3.20(1.07)                         | 3.56(1.08)                              | F (5, 267) = 2.99, <b>p = 0.01</b> , $\eta^2 = 0.05$       |
| I feel optimistic about the health of my clients                                 | 3.02(0.98)                    | 2.82(0.97)           | 2.78(0.98) | 3.04(0.97)          | 2.75(1.09)                         | 3.06(1.27)                              | F (5, 267) = 1.82, $p = 0.11$ , $\eta^2 = 0.03$            |
| I would be disciplined if I did not manage T2DM in people with SMI               | 3.37(1.11)                    | 2.95(1.08)           | 2.79(1.00) | 3.15(1.12)          | 3.16(1.26)                         | 3.16(1.05)                              | F (5, 267) = 3.81, <b>p = 0.002</b> , $\eta^2 = 0.07$      |
| Incentives, such as CQUINS or QOF points, encourage me                           | 2.88(1.12)                    | 2.51(1.11)           | 3.14(1.00) | 2.81(1.20)          | 2.79(1.16)                         | 2.82(0.90)                              | F (5, 267) = 3.53, <b>p = 0.004</b> , $\eta^2 = 0.06$      |
| Managing T2DM in someone with SMI is a routine part of my job                    | 3.50(1.14)                    | 3.23(1.11)           | 3.93(0.90) | 3.62(1.22)          | 3.29(1.35)                         | 3.63(0.80)                              | F (5, 52.25) = 5.13, <b>p = 0.001</b> , $\omega^2 = 0.07$  |
| I tailor the treatment of T2DM in people with SMI depending on their needs       | 3.57(1.06)                    | 3.39(0.98)           | 3.91(0.92) | 3.95(1.10)          | 3.33(1.21)                         | 4.08(0.84)                              | F (5, 267) = 5.25, <b>p &lt; 0.001</b> , $\eta^2 = 0.09$   |
| Managing T2DM in people with SMI worries or concerns me                          | 3.38(1.05)                    | 3.54(1.02)           | 3.27(1.03) | 3.32(1.12)          | 3.32(1.37)                         | 3.19(0.96)                              | F (5, 267) = 0.70, $p = 0.62$ , $\eta^2 = 0.01$            |

|                                                                                           | Mental Health Nurse (n = 124) | Psychiatrist (n=108) | GP (n=29)  | Other Nurses (n=60) | Allied Health Professionals (n=37) | Diabetologist or Endocrinologist (n=11) | ANOVA                                                |
|-------------------------------------------------------------------------------------------|-------------------------------|----------------------|------------|---------------------|------------------------------------|-----------------------------------------|------------------------------------------------------|
| Managing T2DM in people with SMI frustrates me                                            | 2.84(1.08)                    | 3.07(1.12)           | 3.26(1.05) | 3.06(1.13)          | 3.13(1.38)                         | 3.00(0.86)                              | F (5, 267) = 1.25, $p = 0.29$ , $\eta^2 = 0.02$      |
| Working with people with SMI scares me                                                    | 1.91(1.04)                    | 1.73(0.96)           | 1.97(0.98) | 2.29(1.10)          | 2.15(1.20)                         | 2.49(1.03)                              | F (5, 267) = 4.08, $p = 0.001$ , $\eta^2 = 0.07$     |
| My patient's level of engagement is a key factor                                          | 3.77(1.04)                    | 3.56(1.04)           | 3.96(0.73) | 3.79(1.12)          | 3.40(1.32)                         | 4.08(0.75)                              | F (5, 50.40) = 3.29, $p = 0.01$ , $\omega^2 = 0.04$  |
| I work as part of a team of healthcare professionals                                      | 3.53(1.15)                    | 3.29(1.25)           | 3.71(1.24) | 3.53(1.17)          | 3.41(1.35)                         | 3.91(1.09)                              | F (5, 267) = 2.02, $p = 0.08$ , $\eta^2 = 0.04$      |
| Family members and carers help me manage T2DM in people with SMI                          | 3.18(1.11)                    | 3.37(1.05)           | 3.58(0.97) | 3.43(1.13)          | 3.00(1.32)                         | 3.89(0.69)                              | F (5, 50.09) = 3.48, $p = 0.009$ , $\omega^2 = 0.04$ |
| I feel confident in managing T2DM in people with SMI                                      | 3.30(1.03)                    | 3.01(1.00)           | 3.33(0.93) | 3.21(1.03)          | 2.99(1.09)                         | 3.51(0.83)                              | F (5, 267) = 2.09, $p = 0.07$ , $\eta^2 = 0.04$      |
| Poorly controlled T2DM in people with SMI affects their mental health                     | 4.08(0.95)                    | 4.13(0.90)           | 3.81(0.77) | 4.02(0.98)          | 3.74(1.27)                         | 4.28(0.88)                              | F (5, 267) = 1.68, $p = 0.14$ , $\eta^2 = 0.03$      |
| If I didn't take steps to manage T2DM in people with SMI, they would come to serious harm | 3.79(1.04)                    | 3.91(1.08)           | 3.85(0.88) | 3.86(0.97)          | 3.77(1.26)                         | 4.02(0.82)                              | F (5, 267) = 0.14, $p = 0.98$ , $\eta^2 < 0.001$     |
| I have a plan that I follow - either in my team or on my own                              | 3.39(1.13)                    | 3.37(1.03)           | 3.39(0.99) | 3.41(1.10)          | 3.33(1.15)                         | 3.67(0.94)                              | F (5, 267) = 0.18, $p = 0.97$ , $\eta^2 < 0.001$     |
| I review how I manage T2DM in people with SMI, and identify ways in which I can improve   | 3.43(1.12)                    | 3.37(1.03)           | 3.29(0.97) | 3.62(1.05)          | 3.34(1.15)                         | 3.70(0.9)                               | F (5, 267) = 1.51, $p = 0.20$ , $\eta^2 = 0.03$      |
| How many of the 9 diabetes care standard are you responsible for?                         | 3.81(2.30)                    | 3.69(2.47)           | 6.65(2.02) | 5.83(2.92)          | 2.42(3.06)                         | 7.67(1.58)                              | F (5, 267) = 14.46, $p < 0.001$ , $\eta^2 = 0.21$    |

Responses were 1-5, with a higher score reflecting greater agreement.

**STROBE 2007 (v4) Statement—Checklist of items that should be included in reports of *cross-sectional studies***

| Section/Topic                | Item # | Recommendation                                                                                                                                                                       | Reported on page # |
|------------------------------|--------|--------------------------------------------------------------------------------------------------------------------------------------------------------------------------------------|--------------------|
| <b>Title and abstract</b>    | 1      | (a) Indicate the study’s design with a commonly used term in the title or the abstract                                                                                               | 1                  |
|                              |        | (b) Provide in the abstract an informative and balanced summary of what was done and what was found                                                                                  | 2                  |
| <b>Introduction</b>          |        |                                                                                                                                                                                      |                    |
| Background/rationale         | 2      | Explain the scientific background and rationale for the investigation being reported                                                                                                 | 5-6                |
| Objectives                   | 3      | State specific objectives, including any prespecified hypotheses                                                                                                                     | 6                  |
| <b>Methods</b>               |        |                                                                                                                                                                                      |                    |
| Study design                 | 4      | Present key elements of study design early in the paper                                                                                                                              | 6                  |
| Setting                      | 5      | Describe the setting, locations, and relevant dates, including periods of recruitment, exposure, follow-up, and data collection                                                      | 6-7                |
| Participants                 | 6      | (a) Give the eligibility criteria, and the sources and methods of selection of participants                                                                                          | 6-7                |
| Variables                    | 7      | Clearly define all outcomes, exposures, predictors, potential confounders, and effect modifiers. Give diagnostic criteria, if applicable                                             | 7-8                |
| Data sources/<br>measurement | 8*     | For each variable of interest, give sources of data and details of methods of assessment (measurement). Describe comparability of assessment methods if there is more than one group | 7-8                |
| Bias                         | 9      | Describe any efforts to address potential sources of bias                                                                                                                            | n/a                |
| Study size                   | 10     | Explain how the study size was arrived at                                                                                                                                            | 7                  |
| Quantitative variables       | 11     | Explain how quantitative variables were handled in the analyses. If applicable, describe which groupings were chosen and why                                                         | 8                  |
| Statistical methods          | 12     | (a) Describe all statistical methods, including those used to control for confounding                                                                                                | 8                  |
|                              |        | (b) Describe any methods used to examine subgroups and interactions                                                                                                                  | 8                  |
|                              |        | (c) Explain how missing data were addressed                                                                                                                                          | 8                  |
|                              |        | (d) If applicable, describe analytical methods taking account of sampling strategy                                                                                                   | n/a                |
|                              |        | (e) Describe any sensitivity analyses                                                                                                                                                | n/a                |
| <b>Results</b>               |        |                                                                                                                                                                                      |                    |

|                          |     |                                                                                                                                                                                                              |       |
|--------------------------|-----|--------------------------------------------------------------------------------------------------------------------------------------------------------------------------------------------------------------|-------|
| Participants             | 13* | (a) Report numbers of individuals at each stage of study—eg numbers potentially eligible, examined for eligibility, confirmed eligible, included in the study, completing follow-up, and analysed            | 9     |
|                          |     | (b) Give reasons for non-participation at each stage                                                                                                                                                         | n/a   |
|                          |     | (c) Consider use of a flow diagram                                                                                                                                                                           | n/a   |
| Descriptive data         | 14* | (a) Give characteristics of study participants (eg demographic, clinical, social) and information on exposures and potential confounders                                                                     | 9-10  |
|                          |     | (b) Indicate number of participants with missing data for each variable of interest                                                                                                                          | 9     |
| Outcome data             | 15* | Report numbers of outcome events or summary measures                                                                                                                                                         | 10-22 |
| Main results             | 16  | (a) Give unadjusted estimates and, if applicable, confounder-adjusted estimates and their precision (eg, 95% confidence interval). Make clear which confounders were adjusted for and why they were included | 10-22 |
|                          |     | (b) Report category boundaries when continuous variables were categorized                                                                                                                                    | 10-22 |
|                          |     | (c) If relevant, consider translating estimates of relative risk into absolute risk for a meaningful time period                                                                                             | n/a   |
| Other analyses           | 17  | Report other analyses done—eg analyses of subgroups and interactions, and sensitivity analyses                                                                                                               | n/a   |
| <b>Discussion</b>        |     |                                                                                                                                                                                                              |       |
| Key results              | 18  | Summarise key results with reference to study objectives                                                                                                                                                     | 22    |
| Limitations              | 19  | Discuss limitations of the study, taking into account sources of potential bias or imprecision. Discuss both direction and magnitude of any potential bias                                                   | 25-26 |
| Interpretation           | 20  | Give a cautious overall interpretation of results considering objectives, limitations, multiplicity of analyses, results from similar studies, and other relevant evidence                                   | 22-25 |
| Generalisability         | 21  | Discuss the generalisability (external validity) of the study results                                                                                                                                        | 25-26 |
| <b>Other information</b> |     |                                                                                                                                                                                                              |       |
| Funding                  | 22  | Give the source of funding and the role of the funders for the present study and, if applicable, for the original study on which the present article is based                                                | 26    |

\*Give information separately for cases and controls in case-control studies and, if applicable, for exposed and unexposed groups in cohort and cross-sectional studies.

**Note:** An Explanation and Elaboration article discusses each checklist item and gives methodological background and published examples of transparent reporting. The STROBE checklist is best used in conjunction with this article (freely available on the Web sites of PLoS Medicine at <http://www.plosmedicine.org/>, Annals of Internal Medicine at <http://www.annals.org/>, and Epidemiology at <http://www.epidem.com/>). Information on the STROBE Initiative is available at [www.strobe-statement.org](http://www.strobe-statement.org).

# BMJ Open

## Management of type 2 diabetes mellitus in people with severe mental illness: an online cross-sectional survey of healthcare professionals

|                                 |                                                                                                                                                                                                                                                                                                                                                                                                                                                                                                                                                                                                                                                                             |
|---------------------------------|-----------------------------------------------------------------------------------------------------------------------------------------------------------------------------------------------------------------------------------------------------------------------------------------------------------------------------------------------------------------------------------------------------------------------------------------------------------------------------------------------------------------------------------------------------------------------------------------------------------------------------------------------------------------------------|
| Journal:                        | <i>BMJ Open</i>                                                                                                                                                                                                                                                                                                                                                                                                                                                                                                                                                                                                                                                             |
| Manuscript ID                   | bmjopen-2017-019400.R1                                                                                                                                                                                                                                                                                                                                                                                                                                                                                                                                                                                                                                                      |
| Article Type:                   | Research                                                                                                                                                                                                                                                                                                                                                                                                                                                                                                                                                                                                                                                                    |
| Date Submitted by the Author:   | 27-Nov-2017                                                                                                                                                                                                                                                                                                                                                                                                                                                                                                                                                                                                                                                                 |
| Complete List of Authors:       | McBain, H; City, University of London, School of Health Sciences<br>Lamontagne-Godwin, Frederique; University of West London College of Nursing Midwifery and Healthcare, Richard Wells Research Centre<br>Haddad, Mark; City, University of London, School of Health Sciences<br>Simpson, Alan; City, University of London, School of Health Sciences; East London NHS Foundation Trust, Newham Centre for Mental Health<br>Jones, Julia; University of Hertfordshire, Centre for Research in Primary & Community Care<br>Flood, Chris; City, University of London, School of Health Sciences<br>Mulligan, Kathleen; City, University of London, School of Health Sciences |
| <b>Primary Subject Heading</b>: | Diabetes and endocrinology                                                                                                                                                                                                                                                                                                                                                                                                                                                                                                                                                                                                                                                  |
| Secondary Subject Heading:      | Mental health, Health services research                                                                                                                                                                                                                                                                                                                                                                                                                                                                                                                                                                                                                                     |
| Keywords:                       | General diabetes < DIABETES & ENDOCRINOLOGY, Quality in health care < HEALTH SERVICES ADMINISTRATION & MANAGEMENT, MENTAL HEALTH, Schizophrenia & psychotic disorders < PSYCHIATRY                                                                                                                                                                                                                                                                                                                                                                                                                                                                                          |
|                                 |                                                                                                                                                                                                                                                                                                                                                                                                                                                                                                                                                                                                                                                                             |

SCHOLARONE™  
Manuscripts

1  
2  
3  
4 **Management of type 2 diabetes mellitus in people with severe**  
5  
6  
7 **mental illness: an online cross-sectional survey of healthcare**  
8  
9  
10 **professionals**  
11  
12  
13  
14

15 Dr Hayley McBain<sup>1</sup>, Frederique Lamontagne-Godwin<sup>2</sup>, Dr Mark Haddad<sup>1</sup>, Professor Alan Simpson<sup>1,3</sup>,  
16 Jacqui Chapman<sup>4</sup>, Dr Julia Jones<sup>5</sup>, Dr Chris Flood<sup>1</sup> & Dr Kathleen Mulligan<sup>1,6</sup>  
17  
18  
19  
20

21 <sup>1</sup> School of Health Sciences, City, University of London, London, UK  
22

23 <sup>2</sup> College of Nursing, Midwifery and Healthcare, University of West London, London, UK  
24

25 <sup>3</sup> Newham Centre for Mental Health, East London NHS Foundation Trust, London, UK  
26

27 <sup>4</sup> Hackney Diabetes Centre, Homerton University Hospitals NHS Foundation Trust, London, UK  
28

29 <sup>5</sup> Centre for Research in Primary & Community Care (CRIPACC), University of Hertfordshire, Hatfield,  
30  
31 UK  
32

33 <sup>6</sup> Community Health Newham, East London NHS Foundation Trust, London, UK  
34  
35  
36  
37

38 Corresponding author:  
39

40 Dr Kathleen Mulligan, School of Health Sciences, City University of London, Myddleton Street,  
41

42 London, EC1R 1UW. [Kathleen.mulligan.1@city.ac.uk](mailto:Kathleen.mulligan.1@city.ac.uk), 0207 040 0889  
43  
44  
45  
46

47 Word count 5144  
48  
49  
50  
51  
52  
53  
54  
55  
56  
57  
58  
59  
60



## ABSTRACT

### Objectives

To establish healthcare professionals' (HCPs) views about clinical roles, and the barriers and enablers to delivery of diabetes care for people with severe mental illness (SMI).

### Design

Cross-sectional, postal and online survey.

### Setting

Trusts within the National Health Service (NHS), mental health and diabetes charities and professional bodies.

### Participants

HCPs who care for people with type 2 diabetes mellitus (T2DM) and/or SMI in the UK.

### Primary and secondary outcome measures

The barriers, enablers and experiences of delivering T2DM care for people with SMI, informed by the Theoretical Domains Framework (TDF).

### Results

Responders were 273 HCPs, primarily mental health nurses (33.7%) and psychiatrists (32.2%). Only 25% of respondents had received training in managing T2DM in people with SMI. Mental health professionals felt responsible for significantly fewer recommended diabetes care standards than physical health professionals ( $p<0.001$ ). For those seeing diabetes care as part of their role, the significant barriers to its delivery in the regression analyses were a lack of knowledge ( $p=0.003$ ); a need for training in communication and negotiation skills ( $p=0.04$ ); a lack of optimism about the health of their clients ( $p=0.04$ ) and their ability to manage T2DM in people with SMI ( $p=0.003$ ); the threat of being disciplined

1  
2  
3 (p=0.02); fear of working with people with a mental health condition (p=0.01); a lack of service user  
4 engagement (p=0.006) and a need for incentives (p=0.04). The significant enablers were an understanding  
5 of the need to tailor treatments (p=0.04) and goals (p=0.02) for people with SMI.  
6  
7

## 8 9 10 **Conclusions**

11  
12 This survey indicates that despite current guidelines, diabetes care in mental health settings remains  
13 peripheral. Even when diabetes care is perceived as part of a HCP's role, various individual and  
14 organisational barriers to delivering recommended T2DM care standards to people with SMI are  
15 experienced.  
16  
17  
18  
19  
20  
21  
22  
23  
24  
25  
26  
27  
28  
29  
30  
31  
32  
33  
34  
35  
36  
37  
38  
39  
40  
41  
42  
43  
44  
45  
46  
47  
48  
49  
50  
51  
52  
53  
54  
55  
56  
57  
58  
59  
60

## STRENGTHS AND LIMITATIONS OF THIS STUDY

- The survey is informed by the Theoretical Domains Framework, a robust theoretical approach to exploring the barriers and enablers to behaviour change, guided by the MRC Framework for developing complex interventions
- We attempted to recruit participants from a range of sources, including NHS trusts, charities and professional bodies in the UK
- The cross-sectional study design means cause and effect relationships cannot be established
- The survey failed to capture the barriers and enablers to delivering recommended diabetes care to people with SMI by healthcare professionals who did not see this as being part of their clinical role
- Despite the recruitment strategy aiming to target a range of healthcare professionals, GPs, diabetologists and physical health nurses are under-represented

## INTRODUCTION

Diabetes affects an estimated 415 million people worldwide and accounts for 12% of international health expenditure.[1] In the UK, 6.2% of adults are estimated to have diabetes and as in other high income countries approximately 90% of these have type 2 diabetes (T2DM).[1] There are a range of important risk factors for the development of T2DM, one of which is diagnosis of a severe mental illness (SMI), which is associated with a 2-3 fold increase in likelihood of developing the condition.[2] This increased risk has been attributed to poor diet, obesity and physical inactivity,[2, 3] the effects of anti-psychotic medications[4] and high rates of smoking.[5] As a consequence, those with T2DM and SMI die significantly younger than people with T2DM without SMI[6] and experience a greater risk of T2DM complications that require specialist treatment.[7]

These significant health inequalities may in part be explained by variations in diabetes care.[8, 9] Evidence suggests that people with SMI can be less likely to receive more novel cost-intensive medications;[10] retinopathy screening;[11, 8] foot examinations;[8] testing of HbA1c,[8, 9] renal checks;[8] and diabetes education.[12] They are also less likely to be hospitalised for diabetes than those with diabetes alone.[12, 9] The reasons for these disparities in care are wide ranging. At an individual level the knowledge and skills of mental health nurses to deliver and support diabetes care has been questioned[13, 14, 15] and previous theory-driven qualitative research that underpins this study[16] found that not knowing how to manage and monitor T2DM and engage and communicate with service users were significant barriers to delivering recommended care. There is also poor awareness, particularly amongst mental health professionals, about national and local guidelines for managing T2DM.[16] Despite hope and optimism being central to facilitating recovery in people with SMI,[17] healthcare professionals have also been found to be despondent about the health of their clients,[16] which could impact on how service users are engaged and how care is delivered.

1  
2  
3  
4  
5 At an organisational level the lack of integrated mental and physical health care services has been  
6  
7 identified as a barrier to delivering care. Care pathways for people with a SMI and diabetes are often  
8  
9 complex and fragmented and healthcare professionals value integrated care and easy access to a  
10  
11 multidisciplinary team,[16] Despite this, co-location of mental and physical services seems to have  
12  
13 had variable impact on the delivery of diabetes care.[18] There also appears to be issues in relation  
14  
15 to perceived roles and responsibilities. Whilst some research shows confusion and role ambiguity  
16  
17 about the responsibility for monitoring and supporting people with T2DM and SMI,[13] our previous  
18  
19 qualitative research indicates a clear demarcation between the perceived responsibilities of mental  
20  
21 health versus primary care and specialist diabetes services.[16] Whilst all professional groups felt it  
22  
23 was their role to ensure the population were able to access relevant diabetes services, support  
24  
25 service users to lead healthier lifestyles and either monitor or help service users to monitor their  
26  
27 blood glucose levels, it was those from primary care and specialist diabetes services that felt that  
28  
29 starting new or titrating diabetes treatments in people with SMI was their responsibility. Mental  
30  
31 health professionals felt that monitoring medication adherence, blood pressure, weight and assisting  
32  
33 service users to attend their diabetes appointments were their responsibility. This is in opposition to  
34  
35 current recommendations that promote shared responsibility between mental and physical health  
36  
37 care services, for at least the first 12 months or until the person's condition has stabilised.[19, 20,  
38  
39  
40 21]

41  
42  
43  
44  
45 Guided by the Medical Research Council (MRC) recommendations for developing complex  
46  
47 interventions,[22] to create a theoretically- and evidence-based intervention, this study aimed to  
48  
49 explore a full range of potential barriers and enablers to delivering diabetes care to people with SMI  
50  
51 and model these relationships. This will allow for selection of key behaviour change techniques and  
52  
53 subsequent incorporation of them in an intervention to improve the care delivered to this  
54  
55 population. The purpose of this study was therefore to identify the primary barriers and enablers  
56  
57

1  
2  
3 that affect the practice of primary care, specialist mental health and diabetes specialist clinicians in  
4 their management of T2DM in people with SMI. Using this data the intervention components that  
5 could overcome these barriers and enhance the enablers could then be identified.  
6  
7  
8  
9

## 10 **METHODS**

### 11 **Participants**

12  
13  
14  
15  
16 A cross-sectional, online survey was conducted between September 2015 and September 2016. The  
17 target population was any healthcare professional involved in the care of people with either T2DM  
18 and/or SMI. Targeted staff emails, containing a link to the survey, were sent to relevant staff groups  
19 by 9 NHS Trusts providing mental health services in the UK. GP practices across the UK were  
20 approached via 5 Clinical Commissioning Groups. Flyers were distributed at 8 professional  
21 healthcare conferences in the UK and Europe. The Royal Colleges of GPs, Psychiatrists and Nursing,  
22 along with the Association of British Clinical Diabetologists, shared the survey via social media  
23 and/or via their postal and online newsletters, as did the charity Diabetes UK. Staff were informed  
24 that a donation of £2 would be made to a diabetes or mental health charity for each completed  
25 survey questionnaire. The study was approved by the Wales Research Ethics Committee 7 (ref.  
26 15/WA/0310).  
27  
28  
29  
30  
31  
32  
33  
34  
35  
36  
37  
38  
39  
40

41 The size of the target population is in excess of 100,000, comprised of UK GPs, specialists in general  
42 psychiatry and endocrinology and diabetes mellitus,[23] as well as qualified mental health  
43 nurses[24] and diabetes specialist nurses.[25]  
44  
45  
46  
47

### 48 **Measures**

49  
50  
51 *Demographic factors:* Age and gender were collected from participants.

52  
53  
54  
55 *Occupational factors:* Data were collected on profession, length of time in current role, length of  
56 time qualified, country of practice, and site of practice (in- or outpatient). Participants were asked  
57

1  
2  
3 the proportion of their patient group who had T2DM, SMI, and comorbid T2DM and SMI. If they had  
4 received training in how to care for people with T2DM and comorbid T2DM and SMI, and if so when  
5 and where this was. Along with the access they had to any clinical guidelines for the management of  
6  
7  
8  
9 T2DM.

10  
11 *Barriers and enablers:* A 33-item questionnaire (Supplementary file A) was developed to measure  
12 the barriers and enablers to delivering diabetes care to people with SMI, based on qualitative work  
13 undertaken by the team.[16] Items were generated based on the beliefs reported by healthcare  
14 professionals in these interviews, with the most relevant selected through a consensus  
15 approach.[16] The Theoretical Domains Framework (TDF)[26] was used to guide this process to  
16 ensure that the survey was able to capture a comprehensive range of factors that could act as  
17 barriers or enablers to delivering diabetes care. Items covered each of the 14 domains within the  
18 TDF (1) knowledge (2) skills (3) intention (4) social professional role & identity (5) social influence (6)  
19 goals (7) beliefs about consequences (8) beliefs about capabilities (9) memory, attention & decision  
20 processes (10) environmental context & resources (11) behavioural regulation (12) emotion (13)  
21 reinforcement (14) optimism. Responses were on a 5-point Likert scale from 1 strongly agree to 5  
22 strongly disagree. All items were reverse scored.

23  
24  
25  
26  
27  
28  
29  
30  
31  
32  
33  
34  
35  
36  
37 *Delivery of diabetes care:* As part of the 33-item TDF questionnaire participants were asked if each of  
38 the nine key components of diabetes care[27] were part of their role. A sum score was calculated in  
39 order to measure the degree to which diabetes care was part of a person's professional role. If  
40 participants responded yes to this question, they were then asked 'Over the past 12 months, given  
41  
42  
43  
44  
45  
46  
47 10 service users with diabetes and SMI, for how many did you deliver that aspect of care?'

### 48 **Sample size estimation**

49  
50 To conduct regression modelling with 38 predictor variables, which included the 33 items of the  
51 barrier and enablers questionnaire, gender, age, profession, years in role and years in practice, a  
52  
53  
54  
55  
56  
57

total of 208 participants were required. Calculation was based upon an anticipated medium effect size of 0.15, with 80% power and alpha 0.05.

## Analysis

Data were analysed using IBM SPSS Statistics v.23. Differences between the professional groups were explored using ANOVA. Negative binomial and Poisson regressions were used to assess the predictors of the number of people with SMI for which diabetes guidelines were implemented. Entry of variables into the regression analysis was based on significant univariate associations between the predictor and outcome ( $p = 0.05$ ).

In order to identify the intervention components, otherwise known as behaviour change techniques, which could overcome the identified barriers and enhance the enablers to delivering T2DM to people with SMI, we were informed by matrixes that map theoretical domains of the TDF to the appropriate behaviour change techniques.[28, 29, 30] The experience of the research team, which included clinicians, psychologists and clinician educators, were then used to select the appropriate behaviour change techniques.

## RESULTS

### Participants

A total of 386 healthcare professionals consented into the study. Across the entire dataset there was 27.86% missing data, with complete data for 151 participants (39.11%), and 113 participants (29.27%) with more than 50% missing data. Of the 88 individual variables all had some degree of missing data. After excluding participants with more than 50% missing data there was a final sample of 273 (71%). Little's Missing Completely at Random (MCAR) test was non-significant ( $\chi^2 = 439.564$ ,  $df = 484$ ,  $p = 0.93$ ) and hence data was MCAR. Missing data was therefore managed using multiple imputation methods.



A majority of the 273 participants were British (n=179, 66%) and female (n=96, 35%) (Table 1).

Participants were primarily mental health nurses (n=92, 33.7%) or psychiatrists (n = 88, 32.2%). Most were practicing in England, in a community setting and had been in their current role for on average 9 years (SD = 8.39 years).

**Table 1. Participant descriptors**

| Variable                          | n   | %   |
|-----------------------------------|-----|-----|
| <b>Ethnicity</b>                  |     |     |
| British                           | 179 | 66  |
| Any other white                   | 29  | 11  |
| Irish                             | 10  | 3.7 |
| Indian                            | 10  | 3.7 |
| African                           | 9   | 3.3 |
| Asian                             | 5   | 1.8 |
| Pakistani                         | 5   | 1.8 |
| Any other ethnic group            | 5   | 1.8 |
| White and black African           | 4   | 1.5 |
| Any other mixed                   | 4   | 1.5 |
| White and Asian                   | 3   | 1.1 |
| Caribbean                         | 3   | 1.1 |
| Bangladeshi                       | 2   | 0.7 |
| Chinese                           | 2   | 0.7 |
| White and black Caribbean         | 1   | 0.4 |
| Any other black                   | 1   | 0.4 |
| <b>Profession</b>                 |     |     |
| mental health nurse               | 92  | 34  |
| psychiatrist                      | 88  | 32  |
| general practitioner              | 24  | 8.8 |
| diabetes specialist nurse         | 17  | 6.2 |
| practice nurse                    | 12  | 4.4 |
| diabetologist                     | 8   | 2.2 |
| physical health nurse             | 8   | 2.9 |
| other                             | 6   | 2.9 |
| district or community nurse       | 5   | 1.8 |
| occupational therapist            | 2   | 0.7 |
| assistant practitioner            | 2   | 0.7 |
| social worker or social therapist | 2   | 0.7 |
| endocrinologist                   | 1   | 0.4 |
| dietician                         | 1   | 0.4 |
| student                           | 1   | 0.4 |
| audiologist and speech therapist  | 1   | 0.4 |
| healthcare assistant              | 1   | 0.4 |
| mental health support worker      | 1   | 0.4 |
| podiatrist                        | 1   | 0.4 |

| Variable            | n   | %   |
|---------------------|-----|-----|
| Country of practice |     |     |
| England             | 236 | 86  |
| Scotland            | 4   | 1.5 |
| Wales               | 2   | 0.7 |
| Other               | 5   | 1.8 |
| Site                |     |     |
| community           | 142 | 52  |
| inpatient           | 72  | 26  |
| both                | 59  | 22  |

### Care of T2DM

The proportion of respondents' case load with T2DM was primarily either less than 5% or greater than 20% (Table 2). Approximately 60% of the sample specifically managed diabetes in people with SMI, however only 25% had received any training in how to do so. Of those that had, this had been within their service or via CPD, in the past year. There was no significant association between profession and receipt of training ( $\chi^2 (1, n = 273) = 4.72, p = 0.32$ ).

**Table 2. Case load and experiences of training**

| Variable                                                                           | n   | %     |
|------------------------------------------------------------------------------------|-----|-------|
| Proportion of patients with T2DM                                                   |     |       |
| 5% or less                                                                         | 76  | 27.8  |
| 10%                                                                                | 47  | 17.2  |
| 15%                                                                                | 33  | 12.1  |
| 20% or more                                                                        | 71  | 26.0  |
| Have you had specific training in assessing and managing T2DM?                     |     |       |
| Yes                                                                                | 147 | 53.8  |
| No                                                                                 | 126 | 46.2  |
| When was the most recent training in T2DM you received?                            |     |       |
| In the last year                                                                   | 65  | 44.23 |
| 1-2 years ago                                                                      | 26  | 17.69 |
| 2-4 years ago                                                                      | 20  | 13.61 |
| More than 4 years ago                                                              | 36  | 24.49 |
| If you have received training for assessing and /or managing T2DM, where was this? |     |       |
| Degree                                                                             | 49  | 33.33 |
| Diploma                                                                            | 21  | 14.29 |
| In-service training                                                                | 94  | 63.95 |
| CPD                                                                                | 69  | 46.94 |
| Postgraduate                                                                       | 2   | 1.36  |
| Other                                                                              | 15  | 10.20 |
| Do you have access to clinical guidelines for the management of type 2 diabetes?   |     |       |
| Yes                                                                                | 238 | 87.2  |
| No                                                                                 | 35  | 12.8  |
| If yes, which guidelines are these?                                                |     |       |

| Variable                                                                                       | n   | %     |
|------------------------------------------------------------------------------------------------|-----|-------|
| National Institute for Health and Care Excellence                                              | 12  | 5.04  |
| Local trust                                                                                    | 146 | 61.34 |
| World Health Organisation                                                                      | 3   | 1.26  |
| Scottish Intercollegiate Guidelines Network                                                    | 5   | 2.10  |
| Trend UK                                                                                       | 1   | 0.42  |
| American Diabetes Association                                                                  | 5   | 2.10  |
| Research Society for the Study of Diabetes in India                                            | 1   | 0.42  |
| International Diabetes Federation                                                              | 1   | 0.42  |
| American Association of Clinical Endocrinologists                                              | 2   | 0.84  |
| European Medicines Agency                                                                      | 1   | 0.42  |
| Joint British Diabetes Societies                                                               | 2   | 0.84  |
| Charity                                                                                        | 2   | 0.84  |
| European Foundation for the Study of Diabetes                                                  | 1   | 0.42  |
| Other                                                                                          | 8   | 3.36  |
| Do any of the patients that you provide care for have SMI?                                     |     |       |
| Yes                                                                                            | 258 | 94.5  |
| No                                                                                             | 15  | 5.5   |
| If yes, what proportion of your patients has SMI?                                              |     |       |
| 5% or less                                                                                     | 42  | 16.28 |
| 10%                                                                                            | 11  | 4.26  |
| 15%                                                                                            | 11  | 4.26  |
| 20% or more                                                                                    | 162 | 62.79 |
| Have you had specific training in assessing and managing SMI?                                  |     |       |
| Yes                                                                                            | 209 | 76.6  |
| No                                                                                             | 64  | 23.4  |
| When was the most training in SMI you received?                                                |     |       |
| In the last year                                                                               | 137 | 65.55 |
| 1-2 years ago                                                                                  | 19  | 9.09  |
| 2-4 years ago                                                                                  | 19  | 9.09  |
| More than 4 years ago                                                                          | 34  | 16.27 |
| If you have received training for assessing and/or managing SMI, was this:                     |     |       |
| Pre-registration                                                                               | 17  | 8.13  |
| Post-registration                                                                              | 49  | 23.44 |
| Both                                                                                           | 143 | 68.42 |
| If you have received training for assessing and /or managing SMI, where was this?              |     |       |
| Degree                                                                                         | 110 | 52.63 |
| Diploma                                                                                        | 63  | 30.14 |
| In-service training                                                                            | 158 | 75.60 |
| CPD                                                                                            | 128 | 61.24 |
| MRCPsych                                                                                       | 7   | 3.35  |
| Other                                                                                          | 10  | 4.78  |
| Do you provide diabetes care for people who have SMI?                                          |     |       |
| Yes                                                                                            | 163 | 59.7  |
| No                                                                                             | 110 | 40.3  |
| Have you had specific training in assessing and managing diabetes in people with SMI?          |     |       |
| Yes                                                                                            | 71  | 26    |
| No                                                                                             | 202 | 74    |
| When was the most training in assessing and managing diabetes in people with SMI you received? |     |       |

| Variable                                                                                              | n  | %     |
|-------------------------------------------------------------------------------------------------------|----|-------|
| In the last year                                                                                      | 29 | 40.85 |
| 1-2 years ago                                                                                         | 18 | 25.35 |
| 2-4 years ago                                                                                         | 12 | 16.90 |
| More than 4 years ago                                                                                 | 12 | 16.90 |
| If you have received training for assessing and/or managing diabetes in people with SMI, was this:    |    |       |
| Pre-registration                                                                                      | 6  | 8.45  |
| Post-registration                                                                                     | 45 | 63.38 |
| Both                                                                                                  | 20 | 28.17 |
| If you have received training for assessing and /or managing T2DM in people with SMI, where was this? |    |       |
| Degree                                                                                                | 10 | 14.08 |
| Diploma                                                                                               | 9  | 12.68 |
| In-service training                                                                                   | 44 | 61.97 |
| CPD                                                                                                   | 36 | 50.70 |
| Other                                                                                                 | 5  | 7.04  |

### Barriers and enablers to delivering diabetes care

In order to have sufficient numbers to make comparisons between professions, participants were grouped as either (1) mental health nurses and support workers, (2) psychiatrists, (3) GPs, (3) other nurses (including practice nurses, diabetes specialist nurses, district or community nurses, healthcare assistants, assistant practitioners), (4) allied and other health professions and (5) diabetologists and endocrinologists. Figure 1 displays the responses in relation to each of the 33-items of the TDF questionnaire. Only statistically significant differences between the professions are reported below (see Supplementary file B for all analyses).

#### Barriers

##### *Individual factors*

Only a third of the sample felt confident in their abilities to manage T2DM in people with SMI and only 42% were optimistic about the health of their clients with T2DM. Although 57% felt that managing T2DM in people with SMI was at times worrying or concerning, only a third felt frustrated and only 4% fearful of working with people with SMI. Physical health nurses were however, significantly more scared to work with someone with SMI compared with psychiatrists ( $p = 0.002$ ).

### *Organisations factors*

A third of respondents felt they would be disciplined if they did not manage T2DM in someone with SMI. Mental health nurses and support workers were significantly more likely to believe this than both psychiatrists ( $p = 0.002$ ) and GPs ( $p = 0.03$ ).

Whilst 65% reported that they needed more training in diabetes in order to manage T2DM in people with SMI, a third requested more training to improve their communication and negotiation skills. Allied and other health professionals, along with mental health nurses and support workers, were more likely to agree that they needed more training in diabetes than GPs (MHN:  $p = 0.12$ ; AHP:  $p = 0.02$ ) and diabetologists or endocrinologists (AHP:  $p = 0.04$ ). Physical health nurses were more likely to request training in communication and negotiation skills compared with psychiatrists ( $p < 0.001$ ).

Only a third of the sample felt that there was a definite focus within their organisation on the management of T2DM in people with SMI. GPs were significantly less likely to agree that this was the case than mental health professionals (MHN:  $p < 0.001$ ; psychiatrists:  $p = 0.01$ ), physical health nurses ( $p = 0.02$ ) and diabetologist or endocrinologists ( $p = 0.03$ ).

Perceived roles and responsibilities varied significantly between professions and the elements of care. Only a quarter of the sample felt that examining sensation and circulation in the feet; agreeing a personalised HbA1c target and offering regular reviews; and referring to retinopathy screening were part of their role (Table 3). Approximately half felt that providing general education, monitoring cholesterol and kidney function and providing personalised advice about diet and exercise were part of their clinical role. Whilst 67% and 83% of participants, respectively, felt that monitoring blood pressure and giving advice about weight management were within their remit.

Diabetologists or endocrinologists, GPs and physical health nurses all reported being responsible for

significantly more of the 9 diabetes care standards than mental health nurses and support workers ( $p < 0.001$ ), psychiatrists ( $p < 0.001$ ) and allied and other health professions ( $p < 0.001$ ).

**Table 3. Healthcare professional perceived role in the management of T2DM in SMI**

|                                                    | This is part of my clinical role n(%) | Average number of service users out of 10, with both type 2 diabetes and SMI that had been...? M(SD) |
|----------------------------------------------------|---------------------------------------|------------------------------------------------------------------------------------------------------|
| Given advice about weight management               | 226(82.78)                            | 5.84(3.28)                                                                                           |
| Had their BP monitored                             | 184(67.40)                            | 6.75(2.92)                                                                                           |
| Given general education about T2DM                 | 162(59.34)                            | 5.58(3.12)                                                                                           |
| Given personalised advice about diet and nutrition | 159(58.24)                            | 5.88(3.11)                                                                                           |
| Had their cholesterol monitored                    | 128(46.87)                            | 6.77(2.80)                                                                                           |
| Had their kidney function monitored                | 121(44.32)                            | 7.39(2.44)                                                                                           |
| Had their feet examined                            | 77(28.21)                             | 5.45(3.29)                                                                                           |
| Agreed personalised HbA1c target                   | 77(28.21)                             | 6.55(2.85)                                                                                           |
| Referred to retinopathy screening                  | 68(24.91)                             | 4.92(3.81)                                                                                           |

Enablers

#### *Individual factors*

Half of the sample reported that they knew how to manage T2DM in people with SMI, although allied and other health professionals felt significantly less able to manage T2DM in people with SMI than mental health nurses and support workers ( $p = 0.03$ ), GPs ( $p = 0.04$ ) and diabetologists and endocrinologists ( $p = 0.003$ ). Diabetologists and endocrinologists also felt more able than psychiatrists ( $p = 0.03$ ). Whilst 61% knew the local or national guidelines for managing T2DM, 75% reported that the likelihood of following these guidelines were high. Those working primarily within the physical health domain felt significantly more knowledgeable about these guidelines than mental health nurses and support workers ( $p \leq 0.001$ ), psychiatrists ( $p < 0.001$ ) and allied and other health professionals ( $p = 0.001$ ).

For 61% of the sample, care of T2DM had become a routine part of their role, more so for GPs than psychiatrists ( $p = 0.009$ ) and other allied health professionals ( $p = 0.009$ ), and 53% felt optimistic that

1  
2  
3 they would be able to do it in the future. Although 91% believed that managing T2DM in people with  
4  
5 SMI is as important as managing their mental health, in practice 38% prioritised the management of  
6  
7 mental health over the management of T2DM.  
8  
9

10  
11 For three quarters of respondents, being able to engage with service users was a key factor in being  
12  
13 able to manage T2DM in this population. For 65% this included being able to tailor treatments, along  
14  
15 with the service user's goals and targets (87%), depending on the client's needs and abilities.  
16

17 Physical health nurses were more likely to report doing this than psychiatrists ( $p < 0.01$ ). For half of  
18  
19 the sample this was aided by having a plan and reviewing their practise to improve the delivery of  
20  
21 future care.  
22  
23

24  
25  
26 Between 80 and 90% reported that poorly controlled T2DM in people with SMI further affected the  
27  
28 service user's mental health and that if they didn't take steps to manage T2DM service users would  
29  
30 come to serious harm.  
31  
32

### 33 *Organisational factors*

34  
35  
36 Less than a quarter of participants felt they were encouraged to manage T2DM in people with SMI  
37  
38 by incentives. Both mental health nurses and support workers, and GPs were however more likely to  
39  
40 agree that incentives encouraged them compared to psychiatrists (MHN:  $p = 0.007$ ; GP:  $p = 0.01$ ).  
41

42 Overall 60% of the sample had sufficient time to manage this population, mental health nurses and  
43  
44 support workers were however more likely to agree that this was the case than GPs ( $p = 0.04$ ).  
45

46 Between half and three quarters of respondents felt they had access to other professionals or  
47  
48 worked within multidisciplinary teams who could assist them in caring for someone with T2DM and  
49  
50 SMI, this included working with family members or carers. This could be better aided by integrated  
51  
52 IT systems for 62% of participants.  
53  
54  
55  
56  
57  
58  
59  
60

### **Implementation of diabetes care**

For those participants who indicated that a diabetes care standard was part of their role (Table 3), on average 5 out of every 10 service users with diabetes and SMI were referred on for retinopathy screening; 5-6 were offered diabetes education, advice about weight management, diet and nutrition or had their feet examined; 6-7 had their BP monitored, personalised HbA1c targets agreed or their cholesterol monitored and 7 out of 10 had their kidney function monitored.

### **Predictors of implementing diabetes care**

Table 4 displays the results of Poisson and negative binomial regression analyses to predict implementation of the 9 diabetes care standards. The predictors shown in the table are those that were entered into the regression analyses as they were significantly related to the outcomes in the univariate analysis.



Table 4. Poisson and negative binomial regressions displaying predictors of diabetes care.

| Outcome                                                                                 | Predictors                                                                              | Hypothesis Test    |              |             | Exp( $\beta$ ) | 95% Wald Confidence Interval for Exp( $\beta$ ) |             |
|-----------------------------------------------------------------------------------------|-----------------------------------------------------------------------------------------|--------------------|--------------|-------------|----------------|-------------------------------------------------|-------------|
|                                                                                         |                                                                                         | Wald $\chi^2$      | df           | p           |                | Lower                                           | Upper       |
| Education                                                                               | <b>(Intercept)</b>                                                                      | <b>6.07</b>        | <b>1.00</b>  | <b>0.02</b> | <b>2.39</b>    | <b>1.19</b>                                     | <b>4.80</b> |
|                                                                                         | I know the guidelines                                                                   | 0.38               | 1.00         | 0.90        | 0.99           | 0.90                                            | 1.10        |
|                                                                                         | <b>I know how to manage</b>                                                             | <b>5.51</b>        | <b>1.00</b>  | <b>0.04</b> | <b>1.15</b>    | <b>1.02</b>                                     | <b>1.30</b> |
|                                                                                         | I will follow the NICE diabetes guidelines                                              | 1.75               | 1.00         | 0.33        | 1.07           | 0.96                                            | 1.18        |
|                                                                                         | I have access to people with specialist diabetes knowledge                              | 0.48               | 1.00         | 0.76        | 1.02           | 0.94                                            | 1.10        |
|                                                                                         | I need more training in diabetes                                                        | 1.79               | 1.00         | 0.25        | 0.96           | 0.89                                            | 1.02        |
|                                                                                         | I am optimistic that I will be able to manage T2DM in people with SMI                   | 0.07               | 1.00         | 0.88        | 0.99           | 0.88                                            | 1.11        |
|                                                                                         | Managing T2DM in someone with SMI is a routine part of my job                           | 0.74               | 1.00         | 0.52        | 1.04           | 0.94                                            | 1.16        |
|                                                                                         | I tailor the treatment of T2DM in people with SMI depending on their needs              | 0.14               | 1.00         | 0.95        | 1.00           | 0.90                                            | 1.11        |
|                                                                                         | Managing T2DM in people with SMI worries or concerns me                                 | 1.55               | 1.00         | 0.26        | 0.95           | 0.88                                            | 1.03        |
|                                                                                         | I feel confident                                                                        | 0.62               | 1.00         | 0.64        | 0.96           | 0.84                                            | 1.10        |
|                                                                                         | I review how I manage T2DM in people with SMI, and identify ways in which I can improve | 0.24               | 1.00         | 0.86        | 1.01           | 0.92                                            | 1.11        |
|                                                                                         | <b>How many of the 9 diabetes care standard are you responsible for?</b>                | <b>10.52</b>       | <b>1.00</b>  | <b>0.00</b> | <b>1.06</b>    | <b>1.02</b>                                     | <b>1.10</b> |
|                                                                                         | Weight                                                                                  | <b>(Intercept)</b> | <b>16.34</b> | <b>1.00</b> | <b>0.00</b>    | <b>2.97</b>                                     | <b>1.75</b> |
| <b>Profession</b>                                                                       |                                                                                         | <b>24.18</b>       | <b>4.00</b>  | <b>0.00</b> | -              | -                                               | -           |
| Mental health nurses and support workers                                                |                                                                                         | 0.55               | 1.00         | 0.50        | 0.91           | 0.71                                            | 1.18        |
| Psychiatrists                                                                           |                                                                                         | 2.86               | 1.00         | 0.09        | 1.24           | 0.97                                            | 1.59        |
| GP                                                                                      |                                                                                         | 1.15               | 1.00         | 0.33        | 0.86           | 0.65                                            | 1.14        |
| Other nurses                                                                            |                                                                                         | 0.35               | 1.00         | 0.56        | 1.08           | 0.84                                            | 1.38        |
| I know the guidelines                                                                   |                                                                                         | 3.21               | 1.00         | 0.10        | 1.08           | 0.99                                            | 1.17        |
| I know how to manage                                                                    |                                                                                         | 1.55               | 1.00         | 0.24        | 1.06           | 0.96                                            | 1.17        |
| I have access to people with specialist diabetes knowledge                              |                                                                                         | 1.99               | 1.00         | 0.26        | 0.96           | 0.90                                            | 1.02        |
| I need more training in diabetes                                                        |                                                                                         | 1.10               | 1.00         | 0.34        | 0.97           | 0.92                                            | 1.03        |
| I feel confident                                                                        |                                                                                         | 0.21               | 1.00         | 0.80        | 1.01           | 0.92                                            | 1.11        |
| I review how I manage T2DM in people with SMI, and identify ways in which I can improve |                                                                                         | 1.84               | 1.00         | 0.32        | 1.05           | 0.97                                            | 1.13        |
| <b>How many of the 9 diabetes care standard are you responsible for?</b>                |                                                                                         | <b>7.00</b>        | <b>1.00</b>  | <b>0.02</b> | <b>1.04</b>    | <b>1.01</b>                                     | <b>1.07</b> |
| Diet                                                                                    |                                                                                         | <b>(Intercept)</b> | <b>11.62</b> | <b>1.00</b> | <b>0.01</b>    | <b>2.07</b>                                     | <b>1.36</b> |

| Outcome | Predictors                                                                                | Hypothesis Test |             |             | Exp( $\beta$ ) | 95% Wald Confidence Interval for Exp( $\beta$ ) |             |
|---------|-------------------------------------------------------------------------------------------|-----------------|-------------|-------------|----------------|-------------------------------------------------|-------------|
|         |                                                                                           | Wald $\chi^2$   | df          | p           |                | Lower                                           | Upper       |
|         | I know the guidelines                                                                     | 0.51            | 1.00        | 0.65        | 1.02           | 0.94                                            | 1.12        |
|         | I know how to manage                                                                      | 1.26            | 1.00        | 0.41        | 1.05           | 0.95                                            | 1.16        |
|         | <b>I feel optimistic about the health of my clients</b>                                   | <b>4.69</b>     | <b>1.00</b> | <b>0.04</b> | <b>1.08</b>    | <b>1.01</b>                                     | <b>1.17</b> |
|         | Managing T2DM in someone with SMI is a routine part of my job                             | 0.17            | 1.00        | 0.85        | 1.01           | 0.92                                            | 1.10        |
|         | I review how I manage T2DM in people with SMI, and identify ways in which I can improve   | 3.60            | 1.00        | 0.15        | 1.08           | 0.99                                            | 1.18        |
|         | How many of the 9 diabetes care standard are you responsible for?                         | 4.48            | 1.00        | 0.06        | 1.04           | 1.00                                            | 1.07        |
| BP      | <b>(Intercept)</b>                                                                        | <b>7.47</b>     | <b>1.00</b> | <b>0.01</b> | <b>2.43</b>    | <b>1.28</b>                                     | <b>4.58</b> |
|         | I will follow the NICE diabetes guidelines                                                | 0.14            | 1.00        | 0.79        | 1.01           | 0.94                                            | 1.09        |
|         | I have access to people with specialist diabetes knowledge                                | 0.33            | 1.00        | 0.79        | 1.01           | 0.94                                            | 1.09        |
|         | I need more training in diabetes                                                          | 4.24            | 1.00        | 0.05        | 0.94           | 0.88                                            | 1.00        |
|         | I am optimistic that I will be able to manage T2DM in people with SMI                     | 2.97            | 1.00        | 0.11        | 1.09           | 0.99                                            | 1.20        |
|         | <b>Managing T2DM in someone with SMI is a routine part of my job</b>                      | <b>5.33</b>     | <b>1.00</b> | <b>0.04</b> | <b>1.11</b>    | <b>1.01</b>                                     | <b>1.22</b> |
|         | I tailor the treatment of T2DM in people with SMI depending on their needs                | 0.51            | 1.00        | 0.53        | 0.97           | 0.89                                            | 1.06        |
|         | My patient's level of engagement is a key factor                                          | 3.14            | 1.00        | 0.09        | 1.07           | 0.99                                            | 1.16        |
|         | I feel confident                                                                          | 3.58            | 1.00        | 0.08        | 0.91           | 0.83                                            | 1.01        |
|         | If I didn't take steps to manage T2DM in people with SMI, they would come to serious harm | 3.76            | 1.00        | 0.11        | 1.09           | 1.00                                            | 1.18        |
|         | I review how I manage T2DM in people with SMI, and identify ways in which I can improve   | 0.54            | 1.00        | 0.60        | 1.02           | 0.95                                            | 1.11        |
|         | How many of the 9 diabetes care standard are you responsible for?                         | 4.36            | 1.00        | 0.06        | 1.03           | 1.00                                            | 1.06        |
| Feet    | <b>(Intercept)</b>                                                                        | <b>0.30</b>     | <b>1.00</b> | <b>0.79</b> | <b>0.87</b>    | <b>0.29</b>                                     | <b>2.59</b> |
|         | I need more training in communication and negotiation skills                              | 4.98            | 1.00        | 0.05        | 1.11           | 1.01                                            | 1.22        |
|         | Diabetes goals and targets need to be tailored for people with SMI                        | 0.92            | 1.00        | 0.42        | 1.08           | 0.91                                            | 1.29        |
|         | <b>My patient's level of engagement is a key factor</b>                                   | <b>8.45</b>     | <b>1.00</b> | <b>0.01</b> | <b>1.21</b>    | <b>1.06</b>                                     | <b>1.38</b> |
|         | <b>How many of the 9 diabetes care standard are you responsible for?</b>                  | <b>7.44</b>     | <b>1.00</b> | <b>0.02</b> | <b>1.09</b>    | <b>1.02</b>                                     | <b>1.16</b> |
|         | Profession                                                                                | 9.36            | 4.00        | 0.08        | -              | -                                               | -           |
|         | Mental health nurses and support workers                                                  | 4.69            | 1.00        | 0.07        | 0.70           | 0.50                                            | 0.98        |
|         | <b>Psychiatrists</b>                                                                      | <b>4.73</b>     | <b>1.00</b> | <b>0.04</b> | <b>0.68</b>    | <b>0.47</b>                                     | <b>0.97</b> |
|         | <b>GP</b>                                                                                 | <b>5.36</b>     | <b>1.00</b> | <b>0.03</b> | <b>0.62</b>    | <b>0.42</b>                                     | <b>0.93</b> |
|         | Other nurses                                                                              | 1.30            | 1.00        | 0.27        | 0.85           | 0.64                                            | 1.13        |

| Outcome     | Predictors                                                                   | Hypothesis Test |             |             | Exp( $\beta$ ) | 95% Wald Confidence Interval for Exp( $\beta$ ) |             |
|-------------|------------------------------------------------------------------------------|-----------------|-------------|-------------|----------------|-------------------------------------------------|-------------|
|             |                                                                              | Wald $\chi^2$   | df          | <i>p</i>    |                | Lower                                           | Upper       |
| Cholesterol | <b>(Intercept)</b>                                                           | <b>62.95</b>    | <b>1.00</b> | <b>0.00</b> | <b>4.83</b>    | <b>3.27</b>                                     | <b>7.12</b> |
|             | <b>Working with people with SMI scares me</b>                                | <b>6.97</b>     | <b>1.00</b> | <b>0.01</b> | <b>0.90</b>    | <b>0.83</b>                                     | <b>0.97</b> |
|             | <b>My patient's level of engagement is a key factor</b>                      | <b>8.68</b>     | <b>1.00</b> | <b>0.00</b> | <b>1.14</b>    | <b>1.05</b>                                     | <b>1.25</b> |
| HbA1c       | <b>(Intercept)</b>                                                           | <b>6.57</b>     | <b>1.00</b> | <b>0.01</b> | <b>2.42</b>    | <b>1.23</b>                                     | <b>4.77</b> |
|             | Diabetes goals and targets need to be tailored for people with SMI           | 1.57            | 1.00        | 0.23        | 1.08           | 0.96                                            | 1.22        |
|             | <b>I am optimistic that I will be able to manage T2DM in people with SMI</b> | <b>9.16</b>     | <b>1.00</b> | <b>0.00</b> | <b>1.20</b>    | <b>1.06</b>                                     | <b>1.34</b> |
| Retinopathy | (Intercept)                                                                  | 0.34            | 1.00        | 0.59        | 1.79           | 0.24                                            | 13.35       |
|             | <b>Diabetes goals and targets need to be tailored for people with SMI</b>    | <b>5.55</b>     | <b>1.00</b> | <b>0.03</b> | <b>1.62</b>    | <b>1.08</b>                                     | <b>2.42</b> |
|             | <b>I would be disciplined if I did not manage T2DM in people with SMI</b>    | <b>6.14</b>     | <b>1.00</b> | <b>0.02</b> | <b>0.71</b>    | <b>0.53</b>                                     | <b>0.93</b> |
|             | <b>Incentives, such as CQUINS or QOF points, encourage me</b>                | <b>4.43</b>     | <b>1.00</b> | <b>0.04</b> | <b>0.77</b>    | <b>0.60</b>                                     | <b>0.98</b> |
|             | Family members and carers help me                                            | 2.05            | 1.00        | 0.16        | 1.22           | 0.93                                            | 1.60        |

## Education

The significant independent predictors of the number of people who were given general education about T2DM were knowledge about how to manage T2DM in people with SMI ( $p = 0.04$ ) and the degree to which diabetes care was part of their role ( $p < 0.001$ ). For every additional element of diabetes care that was part of a person's role there was a 6% (95% CI, 1.02 to 1.10) increase in the number of people referred to diabetes education ( $p = 0.003$ ). For every point increase in knowledge about managing diabetes there was a 15% (95% CI, 1.02 to 1.30) increase in number of people referred to diabetes education ( $p = 0.04$ ).

## Weight

The significant independent predictors of the number of people who had advice about weight management were the degree to which diabetes care was part of their role ( $p = 0.02$ ) and profession ( $p < 0.001$ ). For every additional element of diabetes care that was part of their role there was a 4% (95% CI, 1.01 to 1.07) increase in number of people advised about weight management. Psychiatrists reported advising more people about weight management than both mental health nurses and support workers (MD = 1.78, Std. Error = 0.44) and GPs (MD = 2.06, Std. Error = 0.64).

## Diet and nutrition

Optimism about the health of their clients ( $p = 0.04$ ) was the only independent predictor of the number of people who were advised about diet and nutrition. For every point increase in optimism about the health of their clients there was an 8% (95% CI, 1.01 to 1.17) increase in number of people given personalised advice about diet and nutrition.

## Monitoring BP

The degree to which diabetes care was a routine part of their role ( $p = 0.04$ ) was the only independent predictor of the number of people who had their BP monitored. For every point

1  
2  
3 increase in the routine nature of diabetes care in a respondent's role there was an 11% (95% CI, 1.02  
4  
5 to 1.22) increase in number of people given personalised advice about diet and nutrition.  
6  
7

#### 8 Examining feet 9

10 The degree to which diabetes care was part of their role ( $p = 0.02$ ), the level of engagement from the  
11 service user ( $p = 0.01$ ) and profession (psychiatrists  $p = 0.04$  and GPs  $p = 0.03$  compared with allied  
12 and other health professions) were the significant independent predictors of the number of people  
13 who had their feet examined. For every additional element of diabetes care that was part of their  
14 role there was a 9% (95% CI, 1.02 to 1.16) increase in number of people who had their feet checked.  
15  
16 For every point increase engagement from the service user there was a 21% (95% CI, 1.06 to 1.38)  
17  
18 increase in number of foot checks.  
19  
20  
21  
22  
23  
24  
25

#### 26 Agreeing a personalised HbA1c target and provide ongoing review 27

28 How optimistic a person was in their ability to manage T2DM in people with SMI ( $p < 0.001$ ) was the  
29 only independent predictor of the number of service users with whom HbA1c targets were set and  
30 ongoing reviews provided. For every point increase in how optimistic a person was in their ability to  
31 manage T2DM in people with SMI there was a 20% (95% CI, 1.07 to 1.34) increase in number of  
32 service users with whom HbA1c targets were set and ongoing reviews provided.  
33  
34  
35  
36  
37  
38  
39

#### 40 Monitoring cholesterol 41

42 The level of engagement from the service user ( $p < 0.001$ ) and fear of working with someone with a  
43 SMI ( $p = 0.01$ ) were the independent predictors of the number of people who had their cholesterol  
44 monitored. For every point increase in the perceived impact of service user engagement there was a  
45 14% (95% CI, 1.05 to 1.25) increase in the number of people whose cholesterol was monitored and  
46  
47 for every point increase in fear there was a 10% (95% CI, 0.83 to 0.97) decrease in the in number of  
48  
49 cholesterol checks performed.  
50  
51  
52  
53  
54  
55  
56  
57  
58  
59  
60

### Monitoring kidney function

There were no significant univariate associations between the number of people in whom kidney function was monitored and any of the demographic, occupational or TDF factors.

### Referring to retinopathy screening

The belief that goals and targets need to be tailored for people with SMI ( $p = 0.03$ ), that they would be disciplined for not managing T2DM in people with SMI ( $p = 0.02$ ) and the need for incentives to encourage them to manage T2DM in this population ( $p = 0.04$ ) were the significant independent predictors of the number of people referred on for retinopathy screening. For every point increase in the belief that goals and targets need to be tailored for people with SMI there was a 62% (95% CI, 1.08 to 2.42) increase in number of people who were referred on for retinopathy screening. For every point increase in the belief they would be disciplined for not managing T2DM in people with SMI or that incentives would encourage them to manage T2DM in this population, there was a 29% (95% CI, 0.54 to 0.93) and 23% (95% CI, 0.60 to 0.98) decrease, respectively, in the number of people referred on for retinopathy screening.

### Intervention components

Table 5 highlights the TDF domains which were found to be either barriers or enablers to delivering T2DM care to people with SMI, along with the associated behaviour change techniques.[28, 29, 30]

The techniques highlighted in column 2 are those intervention components selected as most appropriate for addressing the barrier or enabler identified in the study.

Table 5. Mapping of relevant TDF domains on intervention components

| RELEVANT TDF DOMAINS | BEHAVIOUR CHANGE TECHNIQUES                                     |
|----------------------|-----------------------------------------------------------------|
| Knowledge            | Information regarding behaviour, outcome<br>Health consequences |

|                                       |                                                                                                                                                                                                                                                                                                                                                                                                |
|---------------------------------------|------------------------------------------------------------------------------------------------------------------------------------------------------------------------------------------------------------------------------------------------------------------------------------------------------------------------------------------------------------------------------------------------|
|                                       | <p>Biofeedback</p> <p>Antecedents</p> <p>Feedback on the behaviour</p>                                                                                                                                                                                                                                                                                                                         |
| Social professional role and identity | <b>Social process of encouragement, pressure and support</b>                                                                                                                                                                                                                                                                                                                                   |
| Optimism                              | <p><b>Verbal persuasion to boost self-efficacy</b></p> <p><b>Focus on past success</b></p>                                                                                                                                                                                                                                                                                                     |
| Social influence                      | <p>Social process of encouragement, pressure and support</p> <p><b>Modelling/demonstration of the behaviour by others</b></p> <p>Social comparison</p> <p>Vicarious reinforcement</p> <p>Restructuring the social environment</p> <p>Identification of self as a role model</p> <p>Social reward</p>                                                                                           |
| Emotion                               | <p>Stress management</p> <p>Coping skills</p> <p><b>Reduce negative emotions</b></p> <p>Emotional consequences</p> <p><b>Self-assessment of affective consequences</b></p> <p>Social support (emotional)</p>                                                                                                                                                                                   |
| Goals                                 | <p>Goal/target specified: behaviour or outcome</p> <p>Contract</p> <p>Rewards; incentives (Inc. self-evaluation)</p> <p>Graded task, starting with easy tasks</p> <p><b>Increasing skills: problem-solving, decision-making, goal-setting</b></p> <p>Social process of encouragement, pressure and support</p> <p>Persuasive communication</p> <p>Information regarding behaviour, outcome</p> |

|               |                                                                                                                                                                                                                                                                                                                                                                                                         |
|---------------|---------------------------------------------------------------------------------------------------------------------------------------------------------------------------------------------------------------------------------------------------------------------------------------------------------------------------------------------------------------------------------------------------------|
|               | Motivational interviewing<br>Review of outcome goal(s)<br>Review of behaviour goal(s)<br>Action planning (including implementation intentions)                                                                                                                                                                                                                                                          |
| Reinforcement | Threat<br><b>Self-reward</b><br>Differential reinforcement<br>Incentive<br>Thinning<br>Negative reinforcement<br>Shaping<br>Counter conditioning<br>Discrimination training<br>Material reward<br>Social reward<br>Non-specific reward<br>Response cost<br><b>Anticipation of future rewards or removal of punishment</b><br>Punishment<br>Extinction<br>Classical conditioning<br>Counter conditioning |

## DISCUSSION

We found that delivery of diabetes care for people with SMI is influenced by a range of individual and organisational factors. Although there were clear differences in the extent of involvement, mental health professionals noted active engagement in many of the aspects of diabetes care, as



1  
2  
3 identified elsewhere in the literature.[14, 13, 15] Confirming our qualitative findings[16] however,  
4  
5 specialist mental health clinicians reported being responsible for fewer diabetes care standards than  
6  
7 primary care and specialist diabetes clinicians. This contests the idea that there is confusion and role  
8  
9 ambiguity about the responsibility for monitoring and supporting T2DM in SMI.[13] In fact this  
10  
11 survey indicates clear boundaries, but when diabetes management is perceived to be a greater part  
12  
13 of a person's role, more service users are treated according to recommended standards. This clearly  
14  
15 reflects conflict between the shared care approach,[21, 20] which promotes mental health  
16  
17 professionals broadening their deliverer to address physical and mental health.[19] This indicates a  
18  
19 need for NHS trusts to define roles and responsibilities more clearly. This is particularly relevant  
20  
21 given that only a third of the sample felt that there was a definite focus in their trust on the  
22  
23 management of T2DM in people with SMI.  
24  
25

26  
27  
28 Although 54% of respondents had received training in diabetes, only a quarter had been trained in  
29  
30 how to manage the condition in people with SMI, and this figure did not differ between the  
31  
32 professions. Despite receiving training, those working in mental health settings felt less  
33  
34 knowledgeable about the guidelines for T2DM and had a desire for more training in how to manage  
35  
36 the condition. This supports the findings of studies conducted in other UK mental health trusts[31,  
37  
38 14, 13, 15, 32] and theory-driven qualitative work that formed the basis of this study.[16]  
39  
40 Importantly, this lack of knowledge and skills meant that healthcare professionals treated fewer  
41  
42 service users according to recommended diabetes care standards. Evaluations of diabetes training  
43  
44 and educational packages for mental health clinicians are limited. Improvements in understanding  
45  
46 and knowledge of diabetes have been reported; however, these findings are based on a small scale,  
47  
48 single group study consisting of primarily mental health students and hence fail to explore its impact  
49  
50 on practice.[33] Any such programme will need to consider the barriers to attending training of this  
51  
52 nature, including a lack of management support, staff shortages, the discretionary nature of  
53  
54  
55  
56  
57  
58  
59  
60

1  
2  
3 attending and lack of funding[34] along with the challenges of using psychosocial interventions to  
4  
5 change practice.[35, 36, 37]  
6  
7

8  
9 Being able to communicate and engage with service users was identified as an important facilitator  
10  
11 in delivering effective diabetes care. As opposed to those working in mental health settings, primary  
12  
13 care and diabetes specialists felt they needed more training in communication and negotiation skills  
14  
15 in order for them to be able to motivate their clients and deliver recommended care. Difficulties  
16  
17 motivating service users with diabetes to self-manage has been identified elsewhere in the  
18  
19 literature[13, 32, 38] and presents an ongoing challenge for interventions aimed at changing the  
20  
21 behaviour of service users with T2DM.[39] Respondents stressed the importance of tailoring  
22  
23 diabetes treatment, along with any goals and targets, to the needs and abilities of the service user.  
24  
25 Mental health staff report experiencing difficulties engaging service users in their diabetes care, due  
26  
27 to limitations in cognitive and executive functioning.[32, 38] Together this highlights the importance  
28  
29 of training healthcare professionals to also be able to identify suitable times within the service user's  
30  
31 journey when they may need more support in order for them to self-manage effectively. The  
32  
33 challenges of communicating and engaging service users in their care, may also be precipitated or be  
34  
35 a consequence of the fear some healthcare professionals experience about working with someone  
36  
37 with a SMI. This further supports research that shows some clinicians experience discomfort in  
38  
39 dealing with people with mental illness leading to physical diagnoses often being missed.[40]  
40  
41  
42  
43  
44

45 Only a third of the sample were optimistic about the health of their clients with T2DM, and a  
46  
47 majority of respondents lacked optimism about their ability to manage T2DM in people with SMI.  
48  
49 This led to fewer service users receiving the recommended diabetes care standards. Given the  
50  
51 importance of hope and optimism in the process of personal recovery in mental health[17] this could  
52  
53 be an important focus for interventions aimed at improving diabetes care and outcomes for service  
54  
55 users, with the potential for wider benefits. The powerful position that healthcare professionals hold  
56  
57

1  
2  
3 as hope-inspiring role models[17] can either enhance or diminish the hope of service users.[41, 42]  
4  
5 This is particularly important considering that practitioner hope has been found to influence the  
6  
7 outcomes of therapy over and above client hope[43] and that cultivating hope in the context of  
8  
9 T2DM is also associated with increased adherence.[44]  
10

11  
12  
13 In line with the findings of our qualitative work[16] a third of respondents felt that they would be  
14  
15 disciplined if they did not manage diabetes in people with SMI and approximately a quarter felt that  
16  
17 incentives would encourage them. Despite this, the threat of being disciplined and need for  
18  
19 incentives appeared to have a counterintuitive effect in the regression analyses. The greater the  
20  
21 perceived threat of being disciplined and a stronger belief that incentives would encourage them to  
22  
23 manage diabetes, the fewer service users received recommended diabetes care. This suggests that  
24  
25 perceived threat of being disciplined and possibly the discordance between desire and receipt of  
26  
27 incentives, was having a paralysing effect on practice. Blame and punishment are felt by healthcare  
28  
29 professionals to be part of health service culture, particularly when someone is involved in an error,  
30  
31 near miss or incident.[45] This however can lead to disempowerment, disunity and a lack of  
32  
33 compassion in the workforce.[46] Rather than allowing people to experiment without fear of reprisal  
34  
35 and view errors as learning opportunities,[46] the workforce are fearful of personal accountability,  
36  
37 litigation and complaints.[47] Although participants felt that incentives would improve their practice,  
38  
39 this study and the evidence for pay-for-performance systems, such as QOF, in changing healthcare  
40  
41 professional behaviour is limited and there is insufficient evidence for their impact on patient health  
42  
43 outcomes.[48]  
44  
45  
46  
47

48  
49 Taken together, our findings suggest that a number of strategies could be implemented to improve  
50  
51 the care offered to people with diabetes and SMI, and as a consequence address the inequalities  
52  
53 experienced by this population. These techniques include increasing healthcare professionals'  
54  
55 knowledge about the guidelines for managing T2DM in people with SMI, increasing awareness of  
56  
57

1  
2  
3 their role and responsibilities towards this patient group, boosting self-efficacy for addressing the  
4 needs of these clients, modelling or demonstrating how healthcare professionals can work with  
5 clients who are less engaged in the care of their diabetes, reduce fear of working with people with a  
6 SMI, increase skills in being able to tailor goals and targets to the needs of the individual service user  
7 and eradicate fear of being disciplined. Identification of these barriers and enablers, and subsequent  
8 BCTs now allows us to move towards development, feasibility testing and piloting of a new approach  
9 to delivering care.[22]

10  
11  
12  
13  
14  
15  
16  
17  
18  
19 The study had a number of limitations. The need to adjust p-values in studies using multiple  
20 outcome measures has been debated widely in the literature.[49] The number of outcomes  
21 measures considered as a family-wise hypothesis has however not been defined and although by not  
22 adjusting this may increase the likelihood of a type I error, adjusting would increase the chance of  
23 type II errors which are no less important. We therefore acknowledge that some of the findings of  
24 this study may have been due to chance. As with any online survey there are concerns about the  
25 representativeness of the sample.[50] There was a bias in responses towards those who were likely  
26 to be more interested in the topic, with significantly more responses from those working within  
27 mental health settings. This raises a broader question about whether SMI is a priority or issue for  
28 diabetes specialists. Due to the online recruitment methods it was not possible estimate the  
29 response rate. In comparison to the target population this sample represents only 0.3% of the  
30 population therefore raising concerns about the generalizability of the findings to the broader  
31 population. Despite the recruitment strategy aiming to target a range of healthcare professionals  
32 GPs, diabetologists and physical health nurses are under-represented. The data from this study  
33 focused on predicting delivery of diabetes care to people with SMI by healthcare professionals who  
34 stated this was part of their role. It may have however, been the case that elements of diabetes care  
35 could have been undertaken by a professional even when it was not explicitly part of their job. Our  
36 results are also only a snapshot of the experiences and beliefs of healthcare professionals; as the  
37  
38  
39  
40  
41  
42  
43  
44  
45  
46  
47  
48  
49  
50  
51  
52  
53  
54  
55  
56  
57  
58  
59  
60

1  
2  
3 care of diabetes in people with SMI becomes of greater priority and services begin to develop, these  
4  
5 views may change.  
6  
7

### 8 **COMPETING INTERESTS**

9  
10 We have read and understood BMJ policy on declaration of interests and declare the following  
11  
12 interests: we have none.  
13  
14

### 15 **FUNDING**

16  
17 This work was supported by Barts Charity, grant number 477/2314.  
18  
19

### 20 **AUTHOR CONTRIBUTIONS**

21  
22 HM - made a substantial contribution to the conception and design of the study, the data analysis,  
23  
24 interpretation of the data, created a first draft of the manuscript, approved the final version and  
25  
26 agrees to be accountable for all aspects of the work.  
27  
28

29  
30 FLG - made a substantial contribution to the conception and design of the study, collection and  
31  
32 interpretation of the data, commented on drafts of the manuscript, approved the final version and  
33  
34 agrees to be accountable for all aspects of the work.  
35  
36

37  
38 MH, AS, JC, JJ, CF and KM all made a substantial contribution to the conception and design of the  
39  
40 study, interpretation of the data, commented on drafts of the manuscript, approved the final version  
41  
42 and agree to be accountable for all aspects of the work.  
43  
44

### 45 **DATA SHARING**

46  
47 There is no other additional unpublished data to be shared.  
48  
49

### 50 **REFERENCE LIST**

51  
52 1 International Diabetes Federation. International Diabetes Federation Diabetes Atlas 7th edition.  
53  
54 2015.  
55  
56  
57  
58  
59  
60

1  
2  
3 2 Osborn DP, Wright CA, Levy G et al. Relative risk of diabetes, dyslipidaemia, hypertension and the  
4 metabolic syndrome in people with severe mental illnesses: systematic review and metaanalysis.

5  
6  
7 BMC Psychiatry 2008;8:84.

8  
9 3 De Hert M, Dekker JM, Wood D et al. Cardiovascular disease and diabetes in people with severe  
10 mental illness position statement from the European Psychiatric Association (EPA), supported by the  
11 European Association for the Study of Diabetes (EASD) and the European Society of Cardiology (ESC).  
12  
13 Eur Psychiatry 2009;24:412-24.

14  
15  
16 4 Alvarez-Jimenez M, Hetrick SE, Gonzalez-Blanch C et al. Non-pharmacological management of  
17 antipsychotic-induced weight gain: systematic review and meta-analysis of randomised controlled  
18  
19 trials. Br J Psychiatry 2008;193:101-7.

20  
21  
22 5 Lawrence D, Mitrou F, and Zubrick SR. Smoking and mental illness: results from population surveys  
23  
24 in Australia and the United States. BMC Public Health 2009;9:285.

25  
26  
27 6 Vinogradova Y, Coupland C, Hippisley-Cox J et al. Effects of severe mental illness on survival of  
28  
29 people with diabetes. Br J Psychiatry 2010;197:272-7.

30  
31  
32 7 Becker T and Hux J. Risk of acute complications of diabetes among people with schizophrenia in  
33  
34 Ontario, Canada. Diabetes Care 2011;34:398-402.

35  
36  
37 8 McGinty EE, Baller J, Azrin ST et al. Quality of medical care for persons with serious mental illness:  
38  
39 A comprehensive review. Schizophr Res 2015;165:227-35.

40  
41 9 Scott D, Platania-Phung C, and Happell B. Quality of Care for Cardiovascular Disease and Diabetes  
42  
43 Amongst Individuals with Serious Mental Illness and Those Using Antipsychotic Medications. J  
44  
45 Healthc Qual 2012;34:15-21.

46  
47 10 Rathmann W, Pscherer S, Konrad M et al. Diabetes treatment in people with type 2 diabetes and  
48  
49 schizophrenia: Retrospective primary care database analyses. Prim Care Diabetes 2016;10:36-40.

50  
51 11 Mathur R, Hull SA, Boomla K et al. Ethnic differences in primary care management of diabetes  
52  
53 and cardiovascular disease in people with serious mental illness. Br J Gen Pract 2012;62:e582-e588.

1  
2  
3 12 Mitchell AJ, Malone D, and Carney Doebbeling C. Quality of medical care for people with and  
4 without comorbid mental illness and substance misuse: systematic review of comparative studies. Br  
5 J Psychiatry 2009;194:491-9.  
6  
7

8  
9 13 Robson D and Haddad M. Mental health nurses' attitudes towards the physical health care of  
10 people with severe and enduring mental illness: the development of a measurement tool. Int J Nurs  
11 Stud 2012;49:72-83.  
12  
13

14  
15 14 Nash M. Mental health nurses' diabetes care skills - a training needs analysis. Br J Nurs  
16 2009;18:628-30.  
17  
18

19  
20 15 Howard L and Gamble C. Supporting mental health nurses to address the physical health needs of  
21 people with serious mental illness in acute inpatient care settings. J Psychiatr Ment Health Nurs  
22 2011;18:105-12.  
23  
24

25  
26 16 McBain H, Mulligan K, Lamontagne-Godwin F et al. Implementation of recommended type 2  
27 diabetes care for people with severe mental illness - a qualitative exploration with healthcare  
28 professionals. BMC Psychiatry 2016;Jul 8;16:222.  
29  
30

31  
32 17 Leamy M, Bird V, Le BC et al. Conceptual framework for personal recovery in mental health:  
33 systematic review and narrative synthesis. Br J Psychiatry 2011;199:445-52.  
34  
35

36  
37 18 Kilbourne AM, Pirraglia PA, Lai Z et al. Quality of general medical care among patients with  
38 serious mental illness: does colocation of services matter? Psychiatr Serv 2011;62:922-8.  
39  
40

41 19 World Health Organization. Mental Health Action Plan 2013-2020. 2013.  
42

43 20 NHS Diabetes. Commissioning Mental Health and Diabetes Services. 2011.  
44

45 21 National Institute for Health and Care Excellence. Psychosis and schizophrenia in adults:  
46 prevention and management. 2014.  
47  
48

49 22 Craig P, Dieppe P, Macintyre S et al. Developing and evaluating complex interventions: the new  
50 Medical Research Council guidance. BMJ 2008;337.  
51  
52

53 23 General Medical Council. List of Registered Medical Practitioners - statistics. 2017.  
54  
55  
56  
57

- 1  
2  
3 24 NHS Digital. Provisional NHS Hospital & Community Health Service (HCHS) monthly workforce  
4  
5 statistics. 2017.  
6  
7 25 Gosden C, James J, Anderson U et al. UK workforce survey of DSNs and nurse consultants. J  
8  
9 Diabetes Nurs 2010;14:250-7.  
10  
11 26 Cane, J., O'Connor, D. and Michie, S., 2012. Validation of the theoretical domains framework for  
12  
13 use in behaviour change and implementation research. *Implement Sci*, 7(1), p.37.  
14  
15 27 National Institute for Health and Care Excellence. Diabetes in adults (QS6). 2011.  
16  
17 28 Michie, S., Atkins, L. and West, R., 2014. The behaviour change wheel: a guide to designing  
18  
19 interventions. Silverback Publishing, Great Britain.  
20  
21 29 Michie S., Johnston, M., Francis, J. et al. From theory to intervention: mapping theoretically  
22  
23 derived behavioural determinants to behaviour change techniques. *Appl Psychol* 2008;57:660-80.  
24  
25 30 Cane J, Richardson M, Johnston M et al. From lists of behaviour change techniques (BCTs) to  
26  
27 structured hierarchies: comparison of two methods of developing a hierarchy of BCTs. *Br J Health*  
28  
29 *Psychol* 2015;20:130-50.  
30  
31 31 Ward D. Improving physical health care in a mental health trust. *Nurs Times* 2005;101:32-3.  
32  
33 32 Hultsjö S. Mental healthcare staff's knowledge and experiences of diabetes care for persons with  
34  
35 psychosis: a qualitative interview study. *Prim Health Care Res Dev* 2013;14:281-92.  
36  
37 33 Hemingway S, Trotter F, Stephenson J et al. Diabetes: increasing the knowledge base of mental  
38  
39 health nurses. *Br J Nurs* 2013;22:991-6.  
40  
41 34 Nash M. Physical care skills: a training needs analysis of inpatient and community mental health  
42  
43 nurses. *Mental Health Practice* 2005;9:20-3.  
44  
45 35 Brooker C and Brabban A. Effective training in psychosocial interventions for work with people  
46  
47 with serious mental health problems. *Mental Health Rev* 2017;11:7-14.  
48  
49 36 Stanbridge RI and Burbach FR. Enhancing working partnerships with carers and families: a  
50  
51 strategy and associated training programme. *Mental Health Rev* 2004;9:32-7.  
52  
53  
54  
55  
56  
57  
58  
59  
60



- 1  
2  
3 37 Slade M, Bird V, Clarke E et al. Supporting recovery in patients with psychosis using adult mental  
4 health teams (REFOCUS): a multi-site cluster randomised controlled trial. *Lancet Psychiatry*  
5 2015;2:503-14.  
6  
7  
8  
9 38 Hultsjö S and Hjelm K. Community health-care staff's experiences of support to prevent type 2  
10 diabetes among people with psychosis: An interview study with health staff. *Int J Mental Health*  
11 *Nurses* 2012;21:480-9.  
12  
13  
14  
15 39 McBain H, Mulligan K, Haddad M et al. Self management interventions for type 2 diabetes in  
16 adult people with severe mental illness. *Cochrane Database Syst Rev* 2016;4:CD011361.  
17  
18  
19  
20 40 Jones S, Howard L, and Thornicroft G. Diagnostic overshadowing': worse physical health care for  
21 people with mental illness. *Acta Psychiatr Scand* 2008;118:169-71.  
22  
23  
24 41 Hobbs M and Baker M. Hope for recovery - how clinicians may facilitate this in their work. *J Ment*  
25 *Health* 2012;21:144-53.  
26  
27  
28 42 Niebieszczanski RJ, Dent H, and McGowan A. 'Your personality is the intervention': a grounded  
29 theory of mental health nurses' beliefs about hope and experiences of fostering hope within a  
30 secure setting. *J Forens Psychiatry Psychol* 2016;27:419-42.  
31  
32  
33  
34 43 Coppock TE, Owen JJ, Zagarskas E et al. The relationship between therapist and client hope with  
35 therapy outcomes. *Psychother Res* 2010;20:619-26.  
36  
37  
38  
39 44 Makarem SC, Smith MF, Mudambi SM et al. Why People Do Not Always Follow the Doctor's  
40 Orders: The Role of Hope and Perceived Control. *J Consum Aff* 2014;48:457-85.  
41  
42  
43 45 Dixon-Woods M, Baker R, Charles K et al. Culture and behaviour in the English National Health  
44 Service: overview of lessons from a large multimethod study. *BMJ Qual Saf* 2013;23:106-15.  
45  
46  
47 46 de Zulueta PC. Developing compassionate leadership in health care: an integrative review. *J*  
48 *Healthc Leadersh* 2016;8:1-10.  
49  
50  
51 47 Goodman B. Risk, rationality and learning for compassionate care; The link between management  
52 practices and the 'lifeworld' of nursing. *Nurse Educ Today* 2014;34:1265-8.  
53  
54  
55  
56  
57  
58  
59  
60

1  
2  
3 48 Mendelson A, Kondo K, Damberg C et al. The Effects of Pay-for-Performance Programs on Health,  
4 Health Care Use, and Processes of Care. *Ann Intern Med* 2017;166:341-53.

5  
6  
7 49 Feise RJ. Do multiple outcome measures require p-value adjustment? *BMC Med Res Methodol*  
8 2002;2:8.

9  
10  
11 50 Whitehead LC. Methodological and ethical issues in Internet-mediated research in the field of  
12 health: an integrated review of the literature. *Soc Sci Med* 2007;65:782-91.

13  
14  
15  
16  
17  
18  
19  
20  
21  
22  
23  
24  
25  
26  
27  
28  
29  
30  
31  
32  
33  
34  
35  
36  
37  
38  
39  
40  
41  
42  
43  
44  
45  
46  
47  
48  
49  
50  
51  
52  
53  
54  
55  
56  
57  
58  
59  
60

For peer review only

1  
2  
3 Figure 1. Barriers and enablers to delivery of T2DM care in people with SMI (n = 273)  
4  
5  
6  
7  
8  
9  
10  
11  
12  
13  
14  
15  
16  
17  
18  
19  
20  
21  
22  
23  
24  
25  
26  
27  
28  
29  
30  
31  
32  
33  
34  
35  
36  
37  
38  
39  
40  
41  
42  
43  
44  
45  
46  
47  
48  
49  
50  
51  
52  
53  
54  
55  
56  
57  
58  
59  
60

For peer review only

1  
2  
3  
4  
5  
6  
7  
8  
9  
10  
11  
12  
13  
14  
15  
16  
17  
18  
19  
20  
21  
22  
23  
24  
25  
26  
27  
28  
29  
30  
31  
32  
33  
34  
35  
36  
37  
38  
39  
40  
41  
42  
43  
44  
45  
46  
47  
48  
49  
50  
51  
52  
53  
54  
55  
56  
57  
58  
59  
60

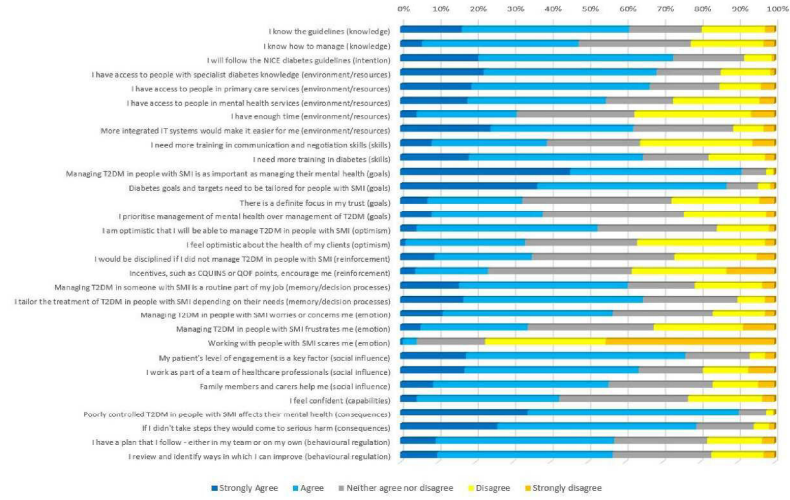

Figure 1.

Figure 1. Barriers and enablers to delivery of T2DM care in people with SMI (n = 273)

297x210mm (300 x 300 DPI)

1  
2  
3  
4  
5  
6  
7  
8  
9  
10  
11  
12  
13  
14  
15  
16  
17  
18  
19  
20  
21  
22  
23  
24  
25  
26  
27  
28  
29  
30  
31  
32  
33  
34  
35  
36  
37  
38  
39  
40  
41  
42  
43  
44  
45  
46  
47  
48  
49  
50  
51  
52  
53  
54  
55  
56  
57  
58  
59  
60

## Supplementary File A.

### Questionnaire to Measures the Barriers and Enablers to Delivering Diabetes Care in People with SMI (*TDF domain*)

|                                                                                                                                                                  |                             |                          |
|------------------------------------------------------------------------------------------------------------------------------------------------------------------|-----------------------------|--------------------------|
| I know the guidelines, national or local, for managing type 2 diabetes ( <i>knowledge</i> )                                                                      | Strong Agree                | <input type="checkbox"/> |
|                                                                                                                                                                  | Agree                       | <input type="checkbox"/> |
|                                                                                                                                                                  | Neither Agree nor Disagree  | <input type="checkbox"/> |
|                                                                                                                                                                  | Disagree                    | <input type="checkbox"/> |
|                                                                                                                                                                  | Strongly Disagree           | <input type="checkbox"/> |
| I know how to manage type 2 diabetes in people with SMI ( <i>knowledge</i> )                                                                                     | Strong Agree                | <input type="checkbox"/> |
|                                                                                                                                                                  | Agree                       | <input type="checkbox"/> |
|                                                                                                                                                                  | Neither Agree nor Disagree  | <input type="checkbox"/> |
|                                                                                                                                                                  | Disagree                    | <input type="checkbox"/> |
|                                                                                                                                                                  | Strongly Disagree           | <input type="checkbox"/> |
| How likely is it that you will follow the NICE diabetes guidelines for your patients who have type 2 diabetes and SMI? ( <i>intention</i> )                      | Very Likely                 | <input type="checkbox"/> |
|                                                                                                                                                                  | Likely                      | <input type="checkbox"/> |
|                                                                                                                                                                  | Neither Likely nor Unlikely | <input type="checkbox"/> |
|                                                                                                                                                                  | Unlikely                    | <input type="checkbox"/> |
|                                                                                                                                                                  | Very Unlikely               | <input type="checkbox"/> |
| I have access to people with specialist diabetes knowledge to help me manage type 2 diabetes in people with SMI ( <i>environmental context &amp; resources</i> ) | Strong Agree                | <input type="checkbox"/> |
|                                                                                                                                                                  | Agree                       | <input type="checkbox"/> |
|                                                                                                                                                                  | Neither Agree nor Disagree  | <input type="checkbox"/> |
|                                                                                                                                                                  | Disagree                    | <input type="checkbox"/> |
|                                                                                                                                                                  | Strongly Disagree           | <input type="checkbox"/> |
| I have access to people in primary care services for my patients with type 2 diabetes and SMI ( <i>environmental context &amp; resources</i> )                   | Strong Agree                | <input type="checkbox"/> |
|                                                                                                                                                                  | Agree                       | <input type="checkbox"/> |
|                                                                                                                                                                  | Neither Agree nor Disagree  | <input type="checkbox"/> |
|                                                                                                                                                                  | Disagree                    | <input type="checkbox"/> |
|                                                                                                                                                                  | Strongly Disagree           | <input type="checkbox"/> |

1  
2  
3  
4  
5  
6  
7  
8  
9  
10  
11  
12  
13  
14  
15  
16  
17  
18  
19  
20  
21  
22  
23  
24  
25  
26  
27  
28  
29  
30  
31  
32  
33  
34  
35  
36  
37  
38  
39  
40  
41  
42  
43  
44  
45  
46  
47  
48  
49  
50  
51  
52  
53  
54  
55  
56  
57  
58  
59  
60

I have access to people in mental health services for my patients with type 2 diabetes and SMI (*environmental context & resources*)

Strong Agree   
Agree   
Neither Agree nor Disagree   
Disagree   
Strongly Disagree

I have enough time to manage type 2 diabetes in people with SMI (*environmental context & resources*)

Strong Agree   
Agree   
Neither Agree nor Disagree   
Disagree   
Strongly Disagree

More integrated IT systems would make it easier for me to manage type 2 diabetes in people with SMI (*environmental context & resources*)

Strong Agree   
Agree   
Neither Agree nor Disagree   
Disagree   
Strongly Disagree

I need more training in communication and negotiation skills in order to manage type 2 diabetes in people with SMI (*skills*)

Strong Agree   
Agree   
Neither Agree nor Disagree   
Disagree   
Strongly Disagree

I need more training in diabetes in order to manage type 2 diabetes in people with SMI (*skills*)

Strong Agree   
Agree   
Neither Agree nor Disagree   
Disagree   
Strongly Disagree

|    |                                                                        |                            |                          |
|----|------------------------------------------------------------------------|----------------------------|--------------------------|
| 1  |                                                                        |                            |                          |
| 2  |                                                                        |                            |                          |
| 3  | Managing patients' type 2 diabetes in people with SMI is as            | Strong Agree               | <input type="checkbox"/> |
| 4  | important as managing their mental health ( <i>goal</i> )              | Agree                      | <input type="checkbox"/> |
| 5  |                                                                        | Neither Agree nor Disagree | <input type="checkbox"/> |
| 6  |                                                                        | Disagree                   | <input type="checkbox"/> |
| 7  |                                                                        | Strongly Disagree          | <input type="checkbox"/> |
| 8  |                                                                        |                            |                          |
| 9  |                                                                        |                            |                          |
| 10 |                                                                        |                            |                          |
| 11 |                                                                        |                            |                          |
| 12 |                                                                        |                            |                          |
| 13 | Diabetes goals and targets need to be tailored for people with         | Strong Agree               | <input type="checkbox"/> |
| 14 | SMI ( <i>goal</i> )                                                    | Agree                      | <input type="checkbox"/> |
| 15 |                                                                        | Neither Agree nor Disagree | <input type="checkbox"/> |
| 16 |                                                                        | Disagree                   | <input type="checkbox"/> |
| 17 |                                                                        | Strongly Disagree          | <input type="checkbox"/> |
| 18 |                                                                        |                            |                          |
| 19 |                                                                        |                            |                          |
| 20 |                                                                        |                            |                          |
| 21 |                                                                        |                            |                          |
| 22 |                                                                        |                            |                          |
| 23 | There is a definite focus in my trust on managing type 2               | Strong Agree               | <input type="checkbox"/> |
| 24 | diabetes in people with SMI ( <i>goal</i> )                            | Agree                      | <input type="checkbox"/> |
| 25 |                                                                        | Neither Agree nor Disagree | <input type="checkbox"/> |
| 26 |                                                                        | Disagree                   | <input type="checkbox"/> |
| 27 |                                                                        | Strongly Disagree          | <input type="checkbox"/> |
| 28 |                                                                        |                            |                          |
| 29 |                                                                        |                            |                          |
| 30 |                                                                        |                            |                          |
| 31 |                                                                        |                            |                          |
| 32 |                                                                        |                            |                          |
| 33 | I prioritise management of mental health over management of            | Strong Agree               | <input type="checkbox"/> |
| 34 | type 2 diabetes in people with type 2 diabetes and SMI ( <i>goal</i> ) | Agree                      | <input type="checkbox"/> |
| 35 |                                                                        | Neither Agree nor Disagree | <input type="checkbox"/> |
| 36 |                                                                        | Disagree                   | <input type="checkbox"/> |
| 37 |                                                                        | Strongly Disagree          | <input type="checkbox"/> |
| 38 |                                                                        |                            |                          |
| 39 |                                                                        |                            |                          |
| 40 |                                                                        |                            |                          |
| 41 |                                                                        |                            |                          |
| 42 |                                                                        |                            |                          |
| 43 | I am optimistic that I will be able to manage type 2 diabetes in       | Strong Agree               | <input type="checkbox"/> |
| 44 | people with SMI ( <i>optimism</i> )                                    | Agree                      | <input type="checkbox"/> |
| 45 |                                                                        | Neither Agree nor Disagree | <input type="checkbox"/> |
| 46 |                                                                        | Disagree                   | <input type="checkbox"/> |
| 47 |                                                                        | Strongly Disagree          | <input type="checkbox"/> |
| 48 |                                                                        |                            |                          |
| 49 |                                                                        |                            |                          |
| 50 |                                                                        |                            |                          |
| 51 |                                                                        |                            |                          |
| 52 |                                                                        |                            |                          |
| 53 |                                                                        |                            |                          |
| 54 |                                                                        |                            |                          |
| 55 |                                                                        |                            |                          |
| 56 |                                                                        |                            |                          |
| 57 |                                                                        |                            |                          |
| 58 |                                                                        |                            |                          |
| 59 |                                                                        |                            |                          |
| 60 |                                                                        |                            |                          |

1  
2  
3  
4  
5  
6  
7  
8  
9  
10  
11  
12  
13  
14  
15  
16  
17  
18  
19  
20  
21  
22  
23  
24  
25  
26  
27  
28  
29  
30  
31  
32  
33  
34  
35  
36  
37  
38  
39  
40  
41  
42  
43  
44  
45  
46  
47  
48  
49  
50  
51  
52  
53  
54  
55  
56  
57  
58  
59  
60

I feel optimistic about the health of my patients with type 2 diabetes and SMI (*optimism*)

Strongly Agree   
Agree   
Neither Agree nor Disagree   
Disagree   
Strongly Disagree

I would be disciplined if I did not manage type 2 diabetes in people with SMI (*reinforcement*)

Strongly Agree   
Agree   
Neither Agree nor Disagree   
Disagree   
Strongly Disagree

Incentives, such as CQUINS or QOF points, encourage me to manage type 2 diabetes in people with SMI (*reinforcement*)

Strongly Agree   
Agree   
Neither Agree nor Disagree   
Disagree   
Strongly Disagree

Managing type 2 diabetes in someone with SMI is a routine part of my job (*memory, attention and decision*)

Strongly Agree   
Agree   
Neither Agree nor Disagree   
Disagree   
Strongly Disagree

I tailor the treatment of type 2 diabetes in people with SMI depending on their needs (*memory, attention and decision*)

Strongly Agree   
Agree   
Neither Agree nor Disagree   
Disagree   
Strongly Disagree



1  
2  
3 Managing type 2 diabetes in people with SMI worries or  
4 concerns me (*emotion*)

Strongly Agree

Agree

Neither Agree nor Disagree

Disagree

Strongly Disagree

11  
12  
13 Managing type 2 diabetes in people with SMI frustrates me  
14 (*emotion*)

Strongly Agree

Agree

Neither Agree nor Disagree

Disagree

Strongly Disagree

21  
22  
23 Working with people with SMI scares me (*emotion*)

Strongly Agree

Agree

Neither Agree nor Disagree

Disagree

Strongly Disagree

31  
32  
33 My patient's level of engagement is a key factor in how I  
34 manage the type 2 diabetes in people with SMI (*social*  
35 *influence*)

Strongly Agree

Agree

Neither Agree nor Disagree

Disagree

Strongly Disagree

41  
42  
43 I work as part of a team of healthcare professionals to help  
44 manage type 2 diabetes in people with SMI (*social influence*)

Strongly Agree

Agree

Neither Agree nor Disagree

Disagree

Strongly Disagree

1  
2  
3  
4  
5  
6  
7  
8  
9  
10  
11  
12  
13  
14  
15  
16  
17  
18  
19  
20  
21  
22  
23  
24  
25  
26  
27  
28  
29  
30  
31  
32  
33  
34  
35  
36  
37  
38  
39  
40  
41  
42  
43  
44  
45  
46  
47  
48  
49  
50  
51  
52  
53  
54  
55  
56  
57  
58  
59  
60

|                                                                                                                                                   |                            |                          |
|---------------------------------------------------------------------------------------------------------------------------------------------------|----------------------------|--------------------------|
| Family members and carers help me manage type 2 diabetes in people with SMI ( <i>social influence</i> )                                           | Strongly Agree             | <input type="checkbox"/> |
|                                                                                                                                                   | Agree                      | <input type="checkbox"/> |
|                                                                                                                                                   | Neither Agree nor Disagree | <input type="checkbox"/> |
|                                                                                                                                                   | Disagree                   | <input type="checkbox"/> |
|                                                                                                                                                   | Strongly Disagree          | <input type="checkbox"/> |
| I feel confident about managing type 2 diabetes in people with SMI ( <i>beliefs about capabilities</i> )                                          | Strongly Agree             | <input type="checkbox"/> |
|                                                                                                                                                   | Agree                      | <input type="checkbox"/> |
|                                                                                                                                                   | Neither Agree nor Disagree | <input type="checkbox"/> |
|                                                                                                                                                   | Disagree                   | <input type="checkbox"/> |
|                                                                                                                                                   | Strongly Disagree          | <input type="checkbox"/> |
| Poorly controlled type 2 diabetes in people with SMI affects their mental health ( <i>beliefs about consequences</i> )                            | Strongly Agree             | <input type="checkbox"/> |
|                                                                                                                                                   | Agree                      | <input type="checkbox"/> |
|                                                                                                                                                   | Neither Agree nor Disagree | <input type="checkbox"/> |
|                                                                                                                                                   | Disagree                   | <input type="checkbox"/> |
|                                                                                                                                                   | Strongly Disagree          | <input type="checkbox"/> |
| If I didn't take steps to manage type 2 diabetes in people with SMI, they would come to serious harm ( <i>beliefs about consequences</i> )        | Strongly Agree             | <input type="checkbox"/> |
|                                                                                                                                                   | Agree                      | <input type="checkbox"/> |
|                                                                                                                                                   | Neither Agree nor Disagree | <input type="checkbox"/> |
|                                                                                                                                                   | Disagree                   | <input type="checkbox"/> |
|                                                                                                                                                   | Strongly Disagree          | <input type="checkbox"/> |
| I have a plan that I follow - either in my team or on my own - when managing type 2 diabetes in people with SMI ( <i>behavioural regulation</i> ) | Strongly Agree             | <input type="checkbox"/> |
|                                                                                                                                                   | Agree                      | <input type="checkbox"/> |
|                                                                                                                                                   | Neither Agree nor Disagree | <input type="checkbox"/> |
|                                                                                                                                                   | Disagree                   | <input type="checkbox"/> |
|                                                                                                                                                   | Strongly Disagree          | <input type="checkbox"/> |

1  
2  
3 I review how I manage type 2 diabetes in people with SMI, and Strong Agree   
4 identify ways in which I can improve (*behavioural regulation*) Agree   
5  
6 Neither Agree nor Disagree   
7 Disagree   
8 Strongly Disagree   
9  
10  
11

12  
13 Is providing general education about type 2 diabetes part of Yes   
14 your clinical role? (*social professional role & identity*) No   
15

16 *If yes, over the past 12 months, given 10 patients with both*  
17 *type 2 diabetes and SMI, for how many did you provide*  
18 *general education about diabetes?*

19  
20  
21  
22 Is giving advice about weight management to patients with Yes   
23 both type 2 diabetes and SMI part of your clinical role? (*social*  
24 *professional role & identity*) No   
25

26 *If yes, over the past 12 months, given 10 patients with both*  
27 *type 2 diabetes and SMI, for how many did you advice about*  
28 *weight management?*

29  
30 Is providing personalised advice about diet and nutrition to Yes   
31 patients with type 2 diabetes and SMI part of your clinical role? No   
32 (*social professional role & identity*)  
33

34 *If yes, over the past 12 months, given 10 patients with both*  
35 *type 2 diabetes and SMI, for how many did you advice about*  
36 *diet and nutrition?*

37  
38 Is monitoring the blood pressure for patients with type 2 Yes   
39 diabetes and SMI a part of your role? (*social professional role &*  
40 *identity*) No   
41

42 *If yes, over the past 12 months, given 10 patients with both*  
43 *type 2 diabetes and SMI, for how many did you monitor their*  
44 *BP?*

45  
46 Is examining the circulation and sensation in the feet of Yes   
47 patients with type 2 diabetes and SMI part of your clinical role? No   
48 (*social professional role & identity*)  
49

50 *If yes, over the past 12 months, given 10 patients with both*  
51 *type 2 diabetes and SMI, for how many did you examine*  
52 *their feet?*

53  
54 Is working with patients with type 2 diabetes and SMI to agree Yes   
55 a personalised HbA1c target and provide ongoing reviews a No   
56 part of your clinical role? (*social professional role & identity*)  
57  
58  
59  
60

1  
2  
3 *If yes, over the past 12 months, given 10 patients with both*  
4 *type 2 diabetes and SMI, for how many did you agree a*  
5 *personalised HbA1c target and provide ongoing reviews?*

6  
7  
8 Is working with patients with type 2 diabetes and SMI to  
9 monitor their cholesterol part of your clinical role? (*social*  
10 *professional role & identity*)

Yes

No

11 *If yes, over the past 12 months, given 10 patients with both*  
12 *type 2 diabetes and SMI, for how many did you monitor*  
13 *cholesterol?*

14  
15  
16 Is working with patients with type 2 diabetes and SMI to  
17 monitor their kidney function part of your clinical role? (*social*  
18 *professional role & identity*)

Yes

No

19 *If yes, over the past 12 months, given 10 patients with both*  
20 *type 2 diabetes and SMI, for how many did you monitor*  
21 *kidney function?*

22  
23  
24 Is working with patients with type 2 diabetes and SMI to refer  
25 to retinopathy screening a part of your clinical role? (*social*  
26 *professional role & identity*)

Yes

No

27 *If yes, over the past 12 months, given 10 patients with both*  
28 *type 2 diabetes and SMI, for how many did you refer to*  
29 *retinopathy screening?*

## Supplementary File B.

## Differences between professions on the barriers and enablers to delivering care

|                                                              | Mental Health Nurse (n = 124) | Psychiatrist (n=108) | GP (n=29)  | Other Nurses (n=60) | Allied Health Professionals (n=37) | Diabetologist or Endocrinologist (n=11) | ANOVA                                                         |
|--------------------------------------------------------------|-------------------------------|----------------------|------------|---------------------|------------------------------------|-----------------------------------------|---------------------------------------------------------------|
| I know the guidelines                                        | 3.31(1.08)                    | 3.11(1.04)           | 4.13(0.76) | 3.95(1.15)          | 3.10(1.14)                         | 4.54(0.63)                              | F (5, 50.63) = 24.78, <b>p &lt; 0.001</b> , $\omega^2 = 0.23$ |
| I know how to manage                                         | 3.41(0.98)                    | 3.08(0.94)           | 3.42(0.91) | 3.13(1.06)          | 2.81(1.17)                         | 3.83(0.87)                              | F (5, 267) = 4.34, <b>p = 0.01</b> , $\eta^2 = 0.08$          |
| I will follow the NICE diabetes guidelines                   | 3.80(0.99)                    | 3.67(0.94)           | 3.85(1.00) | 3.85(1.09)          | 3.38(1.21)                         | 3.73(1.06)                              | F (5, 267) = 1.46, $p = 0.21$ , $\eta^2 = 0.03$               |
| I have access to people with specialist diabetes knowledge   | 3.62(1.07)                    | 3.72(1.09)           | 3.88(0.82) | 3.80(1.10)          | 3.27(1.12)                         | 3.75(1.25)                              | F (5, 48.68) = 2.14, $p = 0.08$ , $\omega^2 = 0.02$           |
| I have access to people in primary care services             | 3.61(1.07)                    | 3.68(1.08)           | 3.82(1.21) | 3.27(1.25)          | 3.39(1.25)                         | 3.42(1.19)                              | F (5, 267) = 2.18, $p = 0.06$ , $\eta^2 = 0.04$               |
| I have access to people in mental health services            | 3.57(1.11)                    | 3.30(1.29)           | 3.12(1.16) | 3.31(1.19)          | 3.14(1.36)                         | 3.29(1.10)                              | F (5, 48.04) = 1.43, $p = 0.23$ , $\omega^2 = 0.01$           |
| I have enough time                                           | 3.10(1.02)                    | 2.74(1.04)           | 2.48(1.02) | 3.07(1.10)          | 2.84(1.20)                         | 2.59(1.11)                              | F (5, 267) = 3.12, <b>p = 0.009</b> , $\eta^2 = 0.009$        |
| More integrated IT systems would make it easier for me       | 3.72(1.05)                    | 3.72(1.18)           | 3.33(1.06) | 3.40(1.02)          | 3.48(1.34)                         | 3.97(0.95)                              | F (5, 267) = 2.38, <b>p = 0.04</b> , $\eta^2 = 0.04$          |
| I need more training in communication and negotiation skills | 3.07(1.12)                    | 2.75(1.12)           | 3.05(1.17) | 3.33(1.11)          | 3.20(1.41)                         | 3.64(1.22)                              | F (5, 46.14) = 5.73, <b>p &lt; 0.001</b> , $\omega^2 = 0.08$  |
| I need more training in diabetes                             | 3.64(1.10)                    | 3.61(1.13)           | 3.18(1.04) | 3.44(1.09)          | 3.79(1.28)                         | 3.21(1.36)                              | F (5, 267) = 4.18, <b>p = 0.001</b> , $\eta^2 = 0.07$         |
| Managing T2DM in people with SMI is as important as          | 4.31(0.86)                    | 4.16(0.87)           | 4.07(0.91) | 4.18(0.90)          | 4.21(1.17)                         | 4.14(1.00)                              | F (5, 267) = 2.47, <b>p = 0.03</b> , $\eta^2 = xxx$           |

|                                                                            | Mental Health Nurse (n = 124) | Psychiatrist (n=108) | GP (n=29)  | Other Nurses (n=60) | Allied Health Professionals (n=37) | Diabetologist or Endocrinologist (n=11) | ANOVA                                                     |
|----------------------------------------------------------------------------|-------------------------------|----------------------|------------|---------------------|------------------------------------|-----------------------------------------|-----------------------------------------------------------|
| managing their mental health                                               |                               |                      |            |                     |                                    |                                         |                                                           |
| Diabetes goals and targets need to be tailored for people with SMI         | 4.06(0.94)                    | 3.86(0.93)           | 4.17(0.92) | 4.21(0.97)          | 4.09(1.18)                         | 4.62(0.62)                              | F (5, 267) = 3.57, <b>p = 0.004</b> , $\eta^2 = 0.06$     |
| There is a definite focus in my trust                                      | 3.22(1.01)                    | 3.05(1.00)           | 2.50(0.92) | 3.10(1.16)          | 3.07(1.19)                         | 3.17(1.33)                              | F (5, 267) = 3.97, <b>p = 0.002</b> , $\eta^2 = 0.07$     |
| I prioritise management of mental health over management of T2DM           | 2.79(1.02)                    | 2.65(1.09)           | 2.76(0.80) | 3.00(0.91)          | 2.96(1.18)                         | 3.03(1.06)                              | F (5, 46.84) = 2.30, $p = 0.06$ , $\omega^2 = 0.02$       |
| I am optimistic that I will be able to manage T2DM in people with SMI      | 3.45(0.91)                    | 3.18(0.98)           | 3.52(0.80) | 3.39(0.93)          | 3.20(1.07)                         | 3.56(1.08)                              | F (5, 267) = 2.99, <b>p = 0.01</b> , $\eta^2 = 0.05$      |
| I feel optimistic about the health of my clients                           | 3.02(0.98)                    | 2.82(0.97)           | 2.78(0.98) | 3.04(0.97)          | 2.75(1.09)                         | 3.06(1.27)                              | F (5, 267) = 1.82, $p = 0.11$ , $\eta^2 = 0.03$           |
| I would be disciplined if I did not manage T2DM in people with SMI         | 3.37(1.11)                    | 2.95(1.08)           | 2.79(1.00) | 3.15(1.12)          | 3.16(1.26)                         | 3.16(1.05)                              | F (5, 267) = 3.81, <b>p = 0.002</b> , $\eta^2 = 0.07$     |
| Incentives, such as CQUINS or QOF points, encourage me                     | 2.88(1.12)                    | 2.51(1.11)           | 3.14(1.00) | 2.81(1.20)          | 2.79(1.16)                         | 2.82(0.90)                              | F (5, 267) = 3.53, <b>p = 0.004</b> , $\eta^2 = 0.06$     |
| Managing T2DM in someone with SMI is a routine part of my job              | 3.50(1.14)                    | 3.23(1.11)           | 3.93(0.90) | 3.62(1.22)          | 3.29(1.35)                         | 3.63(0.80)                              | F (5, 52.25) = 5.13, <b>p = 0.001</b> , $\omega^2 = 0.07$ |
| I tailor the treatment of T2DM in people with SMI depending on their needs | 3.57(1.06)                    | 3.39(0.98)           | 3.91(0.92) | 3.95(1.10)          | 3.33(1.21)                         | 4.08(0.84)                              | F (5, 267) = 5.25, <b>p &lt; 0.001</b> , $\eta^2 = 0.09$  |
| Managing T2DM in people with SMI worries or concerns me                    | 3.38(1.05)                    | 3.54(1.02)           | 3.27(1.03) | 3.32(1.12)          | 3.32(1.37)                         | 3.19(0.96)                              | F (5, 267) = 0.70, $p = 0.62$ , $\eta^2 = 0.01$           |
| Managing T2DM in people with SMI frustrates me                             | 2.84(1.08)                    | 3.07(1.12)           | 3.26(1.05) | 3.06(1.13)          | 3.13(1.38)                         | 3.00(0.86)                              | F (5, 267) = 1.25, $p = 0.29$ , $\eta^2 = 0.02$           |

|                                                                                           | Mental Health Nurse (n = 124) | Psychiatrist (n=108) | GP (n=29)  | Other Nurses (n=60) | Allied Health Professionals (n=37) | Diabetologist or Endocrinologist (n=11) | ANOVA                                                     |
|-------------------------------------------------------------------------------------------|-------------------------------|----------------------|------------|---------------------|------------------------------------|-----------------------------------------|-----------------------------------------------------------|
| Working with people with SMI scares me                                                    | 1.91(1.04)                    | 1.73(0.96)           | 1.97(0.98) | 2.29(1.10)          | 2.15(1.20)                         | 2.49(1.03)                              | F (5, 267) = 4.08, <b>p = 0.001</b> , $\eta^2 = 0.07$     |
| My patient's level of engagement is a key factor                                          | 3.77(1.04)                    | 3.56(1.04)           | 3.96(0.73) | 3.79(1.12)          | 3.40(1.32)                         | 4.08(0.75)                              | F (5, 50.40) = 3.29, <b>p = 0.01</b> , $\omega^2 = 0.04$  |
| I work as part of a team of healthcare professionals                                      | 3.53(1.15)                    | 3.29(1.25)           | 3.71(1.24) | 3.53(1.17)          | 3.41(1.35)                         | 3.91(1.09)                              | F (5, 267) = 2.02, $p = 0.08$ , $\eta^2 = 0.04$           |
| Family members and carers help me manage T2DM in people with SMI                          | 3.18(1.11)                    | 3.37(1.05)           | 3.58(0.97) | 3.43(1.13)          | 3.00(1.32)                         | 3.89(0.69)                              | F (5, 50.09) = 3.48, <b>p = 0.009</b> , $\omega^2 = 0.04$ |
| I feel confident in managing T2DM in people with SMI                                      | 3.30(1.03)                    | 3.01(1.00)           | 3.33(0.93) | 3.21(1.03)          | 2.99(1.09)                         | 3.51(0.83)                              | F (5, 267) = 2.09, $p = 0.07$ , $\eta^2 = 0.04$           |
| Poorly controlled T2DM in people with SMI affects their mental health                     | 4.08(0.95)                    | 4.13(0.90)           | 3.81(0.77) | 4.02(0.98)          | 3.74(1.27)                         | 4.28(0.88)                              | F (5, 267) = 1.68, $p = 0.14$ , $\eta^2 = 0.03$           |
| If I didn't take steps to manage T2DM in people with SMI, they would come to serious harm | 3.79(1.04)                    | 3.91(1.08)           | 3.85(0.88) | 3.86(0.97)          | 3.77(1.26)                         | 4.02(0.82)                              | F (5, 267) = 0.14, $p = 0.98$ , $\eta^2 < 0.001$          |
| I have a plan that I follow - either in my team or on my own                              | 3.39(1.13)                    | 3.37(1.03)           | 3.39(0.99) | 3.41(1.10)          | 3.33(1.15)                         | 3.67(0.94)                              | F (5, 267) = 0.18, $p = 0.97$ , $\eta^2 < 0.001$          |
| I review how I manage T2DM in people with SMI, and identify ways in which I can improve   | 3.43(1.12)                    | 3.37(1.03)           | 3.29(0.97) | 3.62(1.05)          | 3.34(1.15)                         | 3.70(0.9)                               | F (5, 267) = 1.51, $p = 0.20$ , $\eta^2 = 0.03$           |
| How many of the 9 diabetes care standard are you responsible for?                         | 3.81(2.30)                    | 3.69(2.47)           | 6.65(2.02) | 5.83(2.92)          | 2.42(3.06)                         | 7.67(1.58)                              | F (5, 267) = 14.46, <b>p &lt; 0.001</b> , $\eta^2 = 0.21$ |

Responses were 1-5, with a higher score reflecting greater agreement.

**STROBE 2007 (v4) Statement—Checklist of items that should be included in reports of *cross-sectional studies***

| Section/Topic                | Item # | Recommendation                                                                                                                                                                       | Reported on page # |
|------------------------------|--------|--------------------------------------------------------------------------------------------------------------------------------------------------------------------------------------|--------------------|
| <b>Title and abstract</b>    | 1      | (a) Indicate the study’s design with a commonly used term in the title or the abstract                                                                                               | 1                  |
|                              |        | (b) Provide in the abstract an informative and balanced summary of what was done and what was found                                                                                  | 2                  |
| <b>Introduction</b>          |        |                                                                                                                                                                                      |                    |
| Background/rationale         | 2      | Explain the scientific background and rationale for the investigation being reported                                                                                                 | 5-6                |
| Objectives                   | 3      | State specific objectives, including any prespecified hypotheses                                                                                                                     | 6                  |
| <b>Methods</b>               |        |                                                                                                                                                                                      |                    |
| Study design                 | 4      | Present key elements of study design early in the paper                                                                                                                              | 6                  |
| Setting                      | 5      | Describe the setting, locations, and relevant dates, including periods of recruitment, exposure, follow-up, and data collection                                                      | 6-7                |
| Participants                 | 6      | (a) Give the eligibility criteria, and the sources and methods of selection of participants                                                                                          | 6-7                |
| Variables                    | 7      | Clearly define all outcomes, exposures, predictors, potential confounders, and effect modifiers. Give diagnostic criteria, if applicable                                             | 7-8                |
| Data sources/<br>measurement | 8*     | For each variable of interest, give sources of data and details of methods of assessment (measurement). Describe comparability of assessment methods if there is more than one group | 7-8                |
| Bias                         | 9      | Describe any efforts to address potential sources of bias                                                                                                                            | n/a                |
| Study size                   | 10     | Explain how the study size was arrived at                                                                                                                                            | 7                  |
| Quantitative variables       | 11     | Explain how quantitative variables were handled in the analyses. If applicable, describe which groupings were chosen and why                                                         | 8                  |
| Statistical methods          | 12     | (a) Describe all statistical methods, including those used to control for confounding                                                                                                | 8                  |
|                              |        | (b) Describe any methods used to examine subgroups and interactions                                                                                                                  | 8                  |
|                              |        | (c) Explain how missing data were addressed                                                                                                                                          | 8                  |
|                              |        | (d) If applicable, describe analytical methods taking account of sampling strategy                                                                                                   | n/a                |
|                              |        | (e) Describe any sensitivity analyses                                                                                                                                                | n/a                |
| <b>Results</b>               |        |                                                                                                                                                                                      |                    |



|                          |     |                                                                                                                                                                                                              |       |
|--------------------------|-----|--------------------------------------------------------------------------------------------------------------------------------------------------------------------------------------------------------------|-------|
| Participants             | 13* | (a) Report numbers of individuals at each stage of study—eg numbers potentially eligible, examined for eligibility, confirmed eligible, included in the study, completing follow-up, and analysed            | 9     |
|                          |     | (b) Give reasons for non-participation at each stage                                                                                                                                                         | n/a   |
|                          |     | (c) Consider use of a flow diagram                                                                                                                                                                           | n/a   |
| Descriptive data         | 14* | (a) Give characteristics of study participants (eg demographic, clinical, social) and information on exposures and potential confounders                                                                     | 9-10  |
|                          |     | (b) Indicate number of participants with missing data for each variable of interest                                                                                                                          | 9     |
| Outcome data             | 15* | Report numbers of outcome events or summary measures                                                                                                                                                         | 10-22 |
| Main results             | 16  | (a) Give unadjusted estimates and, if applicable, confounder-adjusted estimates and their precision (eg, 95% confidence interval). Make clear which confounders were adjusted for and why they were included | 10-22 |
|                          |     | (b) Report category boundaries when continuous variables were categorized                                                                                                                                    | 10-22 |
|                          |     | (c) If relevant, consider translating estimates of relative risk into absolute risk for a meaningful time period                                                                                             | n/a   |
| Other analyses           | 17  | Report other analyses done—eg analyses of subgroups and interactions, and sensitivity analyses                                                                                                               | n/a   |
| <b>Discussion</b>        |     |                                                                                                                                                                                                              |       |
| Key results              | 18  | Summarise key results with reference to study objectives                                                                                                                                                     | 22    |
| Limitations              | 19  | Discuss limitations of the study, taking into account sources of potential bias or imprecision. Discuss both direction and magnitude of any potential bias                                                   | 25-26 |
| Interpretation           | 20  | Give a cautious overall interpretation of results considering objectives, limitations, multiplicity of analyses, results from similar studies, and other relevant evidence                                   | 22-25 |
| Generalisability         | 21  | Discuss the generalisability (external validity) of the study results                                                                                                                                        | 25-26 |
| <b>Other information</b> |     |                                                                                                                                                                                                              |       |
| Funding                  | 22  | Give the source of funding and the role of the funders for the present study and, if applicable, for the original study on which the present article is based                                                | 26    |

\*Give information separately for cases and controls in case-control studies and, if applicable, for exposed and unexposed groups in cohort and cross-sectional studies.

**Note:** An Explanation and Elaboration article discusses each checklist item and gives methodological background and published examples of transparent reporting. The STROBE checklist is best used in conjunction with this article (freely available on the Web sites of PLoS Medicine at <http://www.plosmedicine.org/>, Annals of Internal Medicine at <http://www.annals.org/>, and Epidemiology at <http://www.epidem.com/>). Information on the STROBE Initiative is available at [www.strobe-statement.org](http://www.strobe-statement.org).

# BMJ Open

## Management of type 2 diabetes mellitus in people with severe mental illness: an online cross-sectional survey of healthcare professionals

|                                 |                                                                                                                                                                                                                                                                                                                                                                                                                                                                                                                                                                                                                                                                             |
|---------------------------------|-----------------------------------------------------------------------------------------------------------------------------------------------------------------------------------------------------------------------------------------------------------------------------------------------------------------------------------------------------------------------------------------------------------------------------------------------------------------------------------------------------------------------------------------------------------------------------------------------------------------------------------------------------------------------------|
| Journal:                        | <i>BMJ Open</i>                                                                                                                                                                                                                                                                                                                                                                                                                                                                                                                                                                                                                                                             |
| Manuscript ID                   | bmjopen-2017-019400.R2                                                                                                                                                                                                                                                                                                                                                                                                                                                                                                                                                                                                                                                      |
| Article Type:                   | Research                                                                                                                                                                                                                                                                                                                                                                                                                                                                                                                                                                                                                                                                    |
| Date Submitted by the Author:   | 28-Dec-2017                                                                                                                                                                                                                                                                                                                                                                                                                                                                                                                                                                                                                                                                 |
| Complete List of Authors:       | McBain, H; City, University of London, School of Health Sciences<br>Lamontagne-Godwin, Frederique; University of West London College of Nursing Midwifery and Healthcare, Richard Wells Research Centre<br>Haddad, Mark; City, University of London, School of Health Sciences<br>Simpson, Alan; City, University of London, School of Health Sciences; East London NHS Foundation Trust, Newham Centre for Mental Health<br>Jones, Julia; University of Hertfordshire, Centre for Research in Primary & Community Care<br>Flood, Chris; City, University of London, School of Health Sciences<br>Mulligan, Kathleen; City, University of London, School of Health Sciences |
| <b>Primary Subject Heading</b>: | Diabetes and endocrinology                                                                                                                                                                                                                                                                                                                                                                                                                                                                                                                                                                                                                                                  |
| Secondary Subject Heading:      | Mental health, Health services research                                                                                                                                                                                                                                                                                                                                                                                                                                                                                                                                                                                                                                     |
| Keywords:                       | General diabetes < DIABETES & ENDOCRINOLOGY, Quality in health care < HEALTH SERVICES ADMINISTRATION & MANAGEMENT, MENTAL HEALTH, Schizophrenia & psychotic disorders < PSYCHIATRY                                                                                                                                                                                                                                                                                                                                                                                                                                                                                          |
|                                 |                                                                                                                                                                                                                                                                                                                                                                                                                                                                                                                                                                                                                                                                             |

SCHOLARONE™  
Manuscripts

1  
2  
3  
4 **Management of type 2 diabetes mellitus in people with**  
5  
6  
7 **severe mental illness: an online cross-sectional survey of**  
8  
9  
10 **healthcare professionals**  
11  
12  
13

14 Dr Hayley McBain<sup>1</sup>, Frederique Lamontagne-Godwin<sup>2</sup>, Dr Mark Haddad<sup>1</sup>, Professor Alan  
15 Simpson<sup>1,3</sup>, Jacqui Chapman<sup>4</sup>, Dr Julia Jones<sup>5</sup>, Dr Chris Flood<sup>1</sup> & Dr Kathleen Mulligan<sup>1,6</sup>  
16  
17  
18

19  
20 <sup>1</sup> School of Health Sciences, City, University of London, London, UK  
21

22 <sup>2</sup> College of Nursing, Midwifery and Healthcare, University of West London, London, UK  
23

24 <sup>3</sup> Newham Centre for Mental Health, East London NHS Foundation Trust, London, UK  
25

26 <sup>4</sup> Hackney Diabetes Centre, Homerton University Hospitals NHS Foundation Trust, London,  
27  
28 UK  
29

30 <sup>5</sup> Centre for Research in Primary & Community Care (CRIPACC), University of Hertfordshire,  
31  
32 Hatfield, UK  
33

34 <sup>6</sup> Community Health Newham, East London NHS Foundation Trust, London, UK  
35  
36  
37

38 Corresponding author:  
39

40 Dr Kathleen Mulligan, School of Health Sciences, City University of London, Myddleton  
41  
42 Street, London, EC1R 1UW. [Kathleen.mulligan.1@city.ac.uk](mailto:Kathleen.mulligan.1@city.ac.uk), 0207 040 0889  
43  
44  
45

46 Word count 5144  
47  
48  
49  
50  
51  
52  
53  
54  
55  
56  
57  
58  
59  
60

## ABSTRACT

### Objectives

To establish healthcare professionals' (HCPs) views about clinical roles, and the barriers and enablers to delivery of diabetes care for people with severe mental illness (SMI).

### Design

Cross-sectional, postal and online survey.

### Setting

Trusts within the National Health Service (NHS), mental health and diabetes charities and professional bodies.

### Participants

HCPs who care for people with type 2 diabetes mellitus (T2DM) and/or SMI in the UK.

### Primary and secondary outcome measures

The barriers, enablers and experiences of delivering T2DM care for people with SMI, informed by the Theoretical Domains Framework (TDF).

### Results

Responders were 273 HCPs, primarily mental health nurses (33.7%) and psychiatrists (32.2%). Only 25% of respondents had received training in managing T2DM in people with SMI. Univariate analysis found that mental health professionals felt responsible for significantly fewer recommended diabetes care standards than physical health professionals ( $p<0.001$ ). For those seeing diabetes care as part of their role, the significant barriers to its delivery in the multiple regression analyses were a lack of knowledge ( $p=0.003$ ); a need for training in communication and negotiation skills ( $p=0.04$ ); a lack of optimism about the health of their clients ( $p=0.04$ ) and their ability to manage T2DM in people with SMI ( $p=0.003$ ); the threat of being disciplined

1  
2  
3 (p=0.02); fear of working with people with a mental health condition (p=0.01); a lack of service  
4 user engagement (p=0.006) and a need for incentives (p=0.04). The significant enablers were an  
5 understanding of the need to tailor treatments (p=0.04) and goals (p=0.02) for people with SMI.  
6  
7  
8

## 9 **Conclusions**

10  
11 This survey indicates that despite current guidelines, diabetes care in mental health settings  
12 remains peripheral. Even when diabetes care is perceived as part of a HCP's role, various  
13 individual and organisational barriers to delivering recommended T2DM care standards to people  
14 with SMI are experienced.  
15  
16  
17  
18  
19  
20  
21  
22  
23  
24  
25  
26  
27  
28  
29  
30  
31  
32  
33  
34  
35  
36  
37  
38  
39  
40  
41  
42  
43  
44  
45  
46  
47  
48  
49  
50  
51  
52  
53  
54  
55  
56  
57  
58  
59  
60

## STRENGTHS AND LIMITATIONS OF THIS STUDY

- The survey is informed by the Theoretical Domains Framework, a robust theoretical approach to exploring the barriers and enablers to behaviour change, guided by the MRC Framework for developing complex interventions
- We attempted to recruit participants from a range of sources, including NHS trusts, charities and professional bodies in the UK
- The cross-sectional study design means cause and effect relationships cannot be established
- The survey failed to capture the barriers and enablers to delivering recommended diabetes care to people with SMI by healthcare professionals who did not see this as being part of their clinical role
- Despite the recruitment strategy aiming to target a range of healthcare professionals, GPs, diabetologists and physical health nurses are under-represented

## INTRODUCTION

Diabetes affects an estimated 415 million people worldwide and accounts for 12% of international health expenditure.[1] In the UK, 6.2% of adults are estimated to have diabetes and as in other high income countries approximately 90% of these have type 2 diabetes (T2DM).[1] There are a range of important risk factors for the development of T2DM, one of which is diagnosis of a severe mental illness (SMI), which is associated with a 2-3 fold increase in likelihood of developing the condition.[2] This increased risk has been attributed to poor diet, obesity and physical inactivity,[2, 3] the effects of anti-psychotic medications[4] and high rates of smoking.[5] As a consequence, those with T2DM and SMI die significantly younger than people with T2DM without SMI[6] and experience a greater risk of T2DM complications that require specialist treatment.[7]

These significant health inequalities may in part be explained by variations in diabetes care.[8, 9] Evidence suggests that people with SMI can be less likely to receive more novel cost-intensive medications;[10] retinopathy screening;[11, 8] foot examinations;[8] testing of HbA1c,[8, 9] renal checks;[8] and diabetes education.[12] They are also less likely to be hospitalised for diabetes than those with diabetes alone.[12, 9] The reasons for these disparities in care are wide ranging. At an individual level the knowledge and skills of mental health nurses to deliver and support diabetes care has been questioned[13, 14, 15] and previous theory-driven qualitative research that underpins this study[16] found that not knowing how to manage and monitor T2DM and engage and communicate with service users were significant barriers to delivering recommended care. There is also poor awareness, particularly amongst mental health professionals, about national and local guidelines for managing T2DM.[16] Despite hope and optimism being central to facilitating recovery in people with SMI,[17] healthcare professionals have also been found to be despondent about the health of their clients,[16] which could impact on how service users are engaged and how care is delivered.

1  
2  
3  
4  
5 At an organisational level the lack of integrated mental and physical health care services has  
6  
7 been identified as a barrier to delivering care. Care pathways for people with a SMI and  
8  
9 diabetes are often complex and fragmented and healthcare professionals value integrated  
10  
11 care and easy access to a multidisciplinary team,[16] Despite this, co-location of mental and  
12  
13 physical services seems to have had variable impact on the delivery of diabetes care.[18]  
14  
15 There also appears to be issues in relation to perceived roles and responsibilities. Whilst  
16  
17 some research shows confusion and role ambiguity about the responsibility for monitoring  
18  
19 and supporting people with T2DM and SMI,[13] our previous qualitative research indicates a  
20  
21 clear demarcation between the perceived responsibilities of mental health versus primary  
22  
23 care and specialist diabetes services.[16] Whilst all professional groups felt it was their role  
24  
25 to ensure the population were able to access relevant diabetes services, support service  
26  
27 users to lead healthier lifestyles and either monitor or help service users to monitor their  
28  
29 blood glucose levels, it was those from primary care and specialist diabetes services that felt  
30  
31 that starting new or titrating diabetes treatments in people with SMI was their responsibility.  
32  
33 Mental health professionals felt that monitoring medication adherence, blood pressure,  
34  
35 weight and assisting service users to attend their diabetes appointments were their  
36  
37 responsibility. This is in opposition to current recommendations that promote shared  
38  
39 responsibility between mental and physical health care services, for at least the first 12  
40  
41 months or until the person's condition has stabilised.[19, 20, 21]  
42  
43

44  
45 Guided by the Medical Research Council (MRC) recommendations for developing complex  
46  
47 interventions,[22] to create a theoretically- and evidence-based intervention, this study  
48  
49 aimed to explore a full range of potential barriers and enablers to delivering diabetes care to  
50  
51 people with SMI and model these relationships. This will allow for selection of key behaviour  
52  
53 change techniques and subsequent incorporation of them in an intervention to improve the  
54  
55 care delivered to this population. The purpose of this study was therefore to identify the  
56  
57 primary barriers and enablers that affect the practice of primary care, specialist mental  
58  
59  
60



1  
2  
3 health and diabetes specialist clinicians in their management of T2DM in people with SMI.  
4  
5 Using this data the intervention components that could overcome these barriers and  
6  
7 enhance the enablers could then be identified.  
8

## 9 10 **METHODS**

### 11 12 **Participants**

13  
14  
15 A cross-sectional, online survey was conducted between September 2015 and September  
16  
17 2016. The target population was any healthcare professional involved in the care of people  
18  
19 with either T2DM and/or SMI. Targeted staff emails, containing a link to the survey, were  
20  
21 sent to relevant staff groups by 9 NHS Trusts providing mental health services in the UK. GP  
22  
23 practices across the UK were approached via 5 Clinical Commissioning Groups. Flyers were  
24  
25 distributed at 8 professional healthcare conferences in the UK and Europe. The Royal  
26  
27 Colleges of GPs, Psychiatrists and Nursing, along with the Association of British Clinical  
28  
29 Diabetologists, shared the survey via social media and/or via their postal and online  
30  
31 newsletters, as did the charity Diabetes UK. Staff were informed that a donation of £2 would  
32  
33 be made to a diabetes or mental health charity for each completed survey questionnaire.  
34  
35 The study was approved by the Wales Research Ethics Committee 7 (ref. 15/WA/0310).  
36

37  
38  
39 The size of the target population is in excess of 100,000, comprised of UK GPs, specialists  
40  
41 in general psychiatry and endocrinology and diabetes mellitus,[23] as well as qualified  
42  
43 mental health nurses[24] and diabetes specialist nurses.[25]  
44

### 45 46 **Measures**

47  
48 *Demographic factors:* Age and gender were collected from participants.  
49

50  
51 *Occupational factors:* Data were collected on profession, length of time in current role, length  
52  
53 of time qualified, country of practice, and site of practice (in- or outpatient). Participants were  
54  
55 asked the proportion of their patient group who had T2DM, SMI, and comorbid T2DM and  
56  
57 SMI. If they had received training in how to care for people with T2DM and comorbid T2DM  
58

1  
2  
3 and SMI, and if so when and where this was. Along with the access they had to any clinical  
4  
5 guidelines for the management of T2DM.

6 *Barriers and enablers:* A 33-item questionnaire (Supplementary file A) was developed to  
7  
8 measure the barriers and enablers to delivering diabetes care to people with SMI, based on  
9  
10 qualitative work undertaken by the team.[16] Items were generated based on the beliefs  
11  
12 reported by healthcare professionals in these interviews, with the most relevant selected  
13  
14 through a consensus approach.[16] The Theoretical Domains Framework (TDF)[26] was  
15  
16 used to guide this process to ensure that the survey was able to capture a comprehensive  
17  
18 range of factors that could act as barriers or enablers to delivering diabetes care. Items  
19  
20 covered each of the 14 domains within the TDF (1) knowledge (2) skills (3) intention (4)  
21  
22 social professional role & identity (5) social influence (6) goals (7) beliefs about  
23  
24 consequences (8) beliefs about capabilities (9) memory, attention & decision processes (10)  
25  
26 environmental context & resources (11) behavioural regulation (12) emotion (13)  
27  
28 reinforcement (14) optimism. Responses were on a 5-point Likert scale from 1 strongly  
29  
30 agree to 5 strongly disagree. All items were reverse scored.

31  
32 *Delivery of diabetes care:* As part of the 33-item TDF questionnaire participants were asked  
33  
34 if each of the nine key components of diabetes care[27] were part of their role. A sum score  
35  
36 was calculated in order to measure the degree to which diabetes care was part of a person's  
37  
38 professional role. If participants responded yes to this question, they were then asked 'Over  
39  
40 the past 12 months, given 10 service users with diabetes and SMI, for how many did you  
41  
42 deliver that aspect of care?'

### 43 44 45 **Sample size estimation**

46  
47 To conduct multiple regression analyses with 38 predictor variables, which included the 33  
48  
49 items of the barrier and enablers questionnaire, gender, age, profession, years in role and  
50  
51 years in practice, a total of 208 participants were required. Calculation was based upon an  
52  
53 anticipated medium effect size of  $f^2=0.15$ , with 80% power and alpha 0.05.  
54  
55  
56  
57

## Analysis

Data were analysed using IBM SPSS Statistics v.23. Differences between the professional groups were explored using ANOVA. Negative binomial and Poisson regressions were used to assess the predictors of the number of people with SMI for which diabetes guidelines were implemented. Entry of variables into the multiple regression analysis was based on significant univariate associations between the predictor and outcome ( $p = 0.05$ ).

In order to identify the intervention components, otherwise known as behaviour change techniques, which could overcome the identified barriers and enhance the enablers to delivering T2DM to people with SMI, we were informed by matrixes that map theoretical domains of the TDF to the appropriate behaviour change techniques.[28, 29, 30] The experience of the research team, which included clinicians, psychologists and clinician educators, were then used to select the appropriate behaviour change techniques.

## RESULTS

### Participants

A total of 386 healthcare professionals consented into the study. Across the entire dataset there was 27.86% missing data, with complete data for 151 participants (39.11%), and 113 participants (29.27%) with more than 50% missing data. Of the 88 individual variables all had some degree of missing data. After excluding participants with more than 50% missing data there was a final sample of 273 (71%). Little's Missing Completely at Random (MCAR) test was non-significant ( $\chi^2 = 439.564$ ,  $df = 484$ ,  $p = 0.93$ ) and hence data was assumed to be MCAR. Missing data was therefore managed using multiple imputation methods.

A majority of the 273 participants were British ( $n=179$ , 66%) and female ( $n=96$ , 35%) (Table 1). Participants were primarily mental health nurses ( $n=92$ , 33.7%) or psychiatrists ( $n = 88$ ,

32.2%). Most were practicing in England, in a community setting and had been in their current role for on average 9 years (SD = 8.39 years).

**Table 1. Participant descriptors**

| Variable                          | n   | %   |
|-----------------------------------|-----|-----|
| Ethnicity                         |     |     |
| British                           | 179 | 66  |
| Any other white                   | 29  | 11  |
| Irish                             | 10  | 3.7 |
| Indian                            | 10  | 3.7 |
| African                           | 9   | 3.3 |
| Asian                             | 5   | 1.8 |
| Pakistani                         | 5   | 1.8 |
| Any other ethnic group            | 5   | 1.8 |
| White and black African           | 4   | 1.5 |
| Any other mixed                   | 4   | 1.5 |
| White and Asian                   | 3   | 1.1 |
| Caribbean                         | 3   | 1.1 |
| Bangladeshi                       | 2   | 0.7 |
| Chinese                           | 2   | 0.7 |
| White and black Caribbean         | 1   | 0.4 |
| Any other black                   | 1   | 0.4 |
| Profession                        |     |     |
| mental health nurse               |     |     |
| psychiatrist                      | 92  | 34  |
| general practitioner              | 88  | 32  |
| diabetes specialist nurse         | 24  | 8.8 |
| practice nurse                    | 17  | 6.2 |
| diabetologist                     | 12  | 4.4 |
| physical health nurse             | 8   | 2.2 |
| other                             | 8   | 2.9 |
| district or community nurse       | 6   | 2.9 |
| occupational therapist            | 5   | 1.8 |
| assistant practitioner            | 2   | 0.7 |
| social worker or social therapist | 2   | 0.7 |
| endocrinologist                   | 1   | 0.4 |
| dietician                         | 1   | 0.4 |
| student                           | 1   | 0.4 |
| audiologist and speech therapist  | 1   | 0.4 |
| healthcare assistant              | 1   | 0.4 |
| mental health support worker      | 1   | 0.4 |
| podiatrist                        |     |     |
| Country of practice               |     |     |
| England                           | 236 | 86  |
| Scotland                          | 4   | 1.5 |
| Wales                             | 2   | 0.7 |
| Other                             | 5   | 1.8 |
| Site                              |     |     |
| community                         | 142 | 52  |

| Variable  | n  | %  |
|-----------|----|----|
| inpatient | 72 | 26 |
| both      | 59 | 22 |

### Care of T2DM

The proportion of respondents' case load with T2DM was primarily either less than 5% or greater than 20% (Table 2). Approximately 60% of the sample specifically managed diabetes in people with SMI, however only 25% had received any training in how to do so. Of those that had, this had been within their service or via CPD, in the past year. There was no significant association between profession and receipt of training ( $\chi^2 (1, n = 273) = 4.72, p = 0.32$ ).

**Table 2. Case load and experiences of training**

| Variable                                                                           | n   | %     |
|------------------------------------------------------------------------------------|-----|-------|
| Proportion of patients with T2DM                                                   |     |       |
| 5% or less                                                                         | 76  | 27.8  |
| 10%                                                                                | 47  | 17.2  |
| 15%                                                                                | 33  | 12.1  |
| 20% or more                                                                        | 71  | 26.0  |
| Have you had specific training in assessing and managing T2DM?                     |     |       |
| Yes                                                                                | 147 | 53.8  |
| No                                                                                 | 126 | 46.2  |
| When was the most recent training in T2DM you received?                            |     |       |
| In the last year                                                                   | 65  | 44.23 |
| 1-2 years ago                                                                      | 26  | 17.69 |
| 2-4 years ago                                                                      | 20  | 13.61 |
| More than 4 years ago                                                              | 36  | 24.49 |
| If you have received training for assessing and /or managing T2DM, where was this? |     |       |
| Degree                                                                             | 49  | 33.33 |
| Diploma                                                                            | 21  | 14.29 |
| In-service training                                                                | 94  | 63.95 |
| CPD                                                                                | 69  | 46.94 |
| Postgraduate                                                                       | 2   | 1.36  |
| Other                                                                              | 15  | 10.20 |
| Do you have access to clinical guidelines for the management of type 2 diabetes?   |     |       |
| Yes                                                                                | 238 | 87.2  |
| No                                                                                 | 35  | 12.8  |
| If yes, which guidelines are these?                                                |     |       |
| National Institute for Health and Care Excellence                                  | 12  | 5.04  |
| Local trust                                                                        | 146 | 61.34 |
| World Health Organisation                                                          | 3   | 1.26  |
| Scottish Intercollegiate Guidelines Network                                        | 5   | 2.10  |
| Trend UK                                                                           | 1   | 0.42  |
| American Diabetes Association                                                      | 5   | 2.10  |

| Variable                                                                                           | n   | %     |
|----------------------------------------------------------------------------------------------------|-----|-------|
| Research Society for the Study of Diabetes in India                                                | 1   | 0.42  |
| International Diabetes Federation                                                                  | 1   | 0.42  |
| American Association of Clinical Endocrinologists                                                  | 2   | 0.84  |
| European Medicines Agency                                                                          | 1   | 0.42  |
| Joint British Diabetes Societies                                                                   | 2   | 0.84  |
| Charity                                                                                            | 2   | 0.84  |
| European Foundation for the Study of Diabetes                                                      | 1   | 0.42  |
| Other                                                                                              | 8   | 3.36  |
| Do any of the patients that you provide care for have SMI?                                         |     |       |
| Yes                                                                                                | 258 | 94.5  |
| No                                                                                                 | 15  | 5.5   |
| If yes, what proportion of your patients has SMI?                                                  |     |       |
| 5% or less                                                                                         | 42  | 16.28 |
| 10%                                                                                                | 11  | 4.26  |
| 15%                                                                                                | 11  | 4.26  |
| 20% or more                                                                                        | 162 | 62.79 |
| Have you had specific training in assessing and managing SMI?                                      |     |       |
| Yes                                                                                                | 209 | 76.6  |
| No                                                                                                 | 64  | 23.4  |
| When was the most training in SMI you received?                                                    |     |       |
| In the last year                                                                                   | 137 | 65.55 |
| 1-2 years ago                                                                                      | 19  | 9.09  |
| 2-4 years ago                                                                                      | 19  | 9.09  |
| More than 4 years ago                                                                              | 34  | 16.27 |
| If you have received training for assessing and/or managing SMI, was this:                         |     |       |
| Pre-registration                                                                                   | 17  | 8.13  |
| Post-registration                                                                                  | 49  | 23.44 |
| Both                                                                                               | 143 | 68.42 |
| If you have received training for assessing and /or managing SMI, where was this?                  |     |       |
| Degree                                                                                             | 110 | 52.63 |
| Diploma                                                                                            | 63  | 30.14 |
| In-service training                                                                                | 158 | 75.60 |
| CPD                                                                                                | 128 | 61.24 |
| MRCPsych                                                                                           | 7   | 3.35  |
| Other                                                                                              | 10  | 4.78  |
| Do you provide diabetes care for people who have SMI?                                              |     |       |
| Yes                                                                                                | 163 | 59.7  |
| No                                                                                                 | 110 | 40.3  |
| Have you had specific training in assessing and managing diabetes in people with SMI?              |     |       |
| Yes                                                                                                | 71  | 26    |
| No                                                                                                 | 202 | 74    |
| When was the most training in assessing and managing diabetes in people with SMI you received?     |     |       |
| In the last year                                                                                   | 29  | 40.85 |
| 1-2 years ago                                                                                      | 18  | 25.35 |
| 2-4 years ago                                                                                      | 12  | 16.90 |
| More than 4 years ago                                                                              | 12  | 16.90 |
| If you have received training for assessing and/or managing diabetes in people with SMI, was this: |     |       |
| Pre-registration                                                                                   | 6   | 8.45  |
| Post-registration                                                                                  | 45  | 63.38 |

| Variable                                                                                              | n  | %     |
|-------------------------------------------------------------------------------------------------------|----|-------|
| Both                                                                                                  | 20 | 28.17 |
| If you have received training for assessing and /or managing T2DM in people with SMI, where was this? |    |       |
| Degree                                                                                                | 10 | 14.08 |
| Diploma                                                                                               | 9  | 12.68 |
| In-service training                                                                                   | 44 | 61.97 |
| CPD                                                                                                   | 36 | 50.70 |
| Other                                                                                                 | 5  | 7.04  |

### Barriers and enablers to delivering diabetes care

In order to have sufficient numbers to make univariate comparisons between professions, participants were grouped as either (1) mental health nurses and support workers, (2) psychiatrists, (3) GPs, (3) other nurses (including practice nurses, diabetes specialist nurses, district or community nurses, healthcare assistants, assistant practitioners), (4) allied and other health professions and (5) diabetologists and endocrinologists. Figure 1 displays the responses in relation to each of the 33-items of the TDF questionnaire. Only statistically significant differences between the professions are reported below (see Supplementary file B for all analyses).

#### Barriers

##### *Individual factors*

Only a third of the sample felt confident in their abilities to manage T2DM in people with SMI and only 42% were optimistic about the health of their clients with T2DM. Although 57% felt that managing T2DM in people with SMI was at times worrying or concerning, only a third felt frustrated and only 4% fearful of working with people with SMI. Physical health nurses were however, significantly more scared to work with someone with SMI compared with psychiatrists ( $p = 0.002$ ).

### *Organisations factors*

A third of respondents felt they would be disciplined if they did not manage T2DM in someone with SMI. Mental health nurses and support workers were significantly more likely to believe this than both psychiatrists ( $p = 0.002$ ) and GPs ( $p = 0.03$ ).

Whilst 65% reported that they needed more training in diabetes in order to manage T2DM in people with SMI, a third requested more training to improve their communication and negotiation skills. Allied and other health professionals, along with mental health nurses and support workers, were more likely to agree that they needed more training in diabetes than GPs (MHN:  $p = 0.12$ ; AHP:  $p = 0.02$ ) and diabetologists or endocrinologists (AHP:  $p = 0.04$ ). Physical health nurses were more likely to request training in communication and negotiation skills compared with psychiatrists ( $p < 0.001$ ).

Only a third of the sample felt that there was a definite focus within their organisation on the management of T2DM in people with SMI. GPs were significantly less likely to agree that this was the case than mental health professionals (MHN:  $p < 0.001$ ; psychiatrists:  $p = 0.01$ ), physical health nurses ( $p = 0.02$ ) and diabetologist or endocrinologists ( $p = 0.03$ ).

Perceived roles and responsibilities varied significantly between professions and the elements of care. Only a quarter of the sample felt that examining sensation and circulation in the feet; agreeing a personalised HbA1c target and offering regular reviews; and referring to retinopathy screening were part of their role (Table 3). Approximately half felt that providing general education, monitoring cholesterol and kidney function and providing personalised advice about diet and exercise were part of their clinical role. Whilst 67% and 83% of participants, respectively, felt that monitoring blood pressure and giving advice about weight management were within their remit. Diabetologists or endocrinologists, GPs and physical health nurses all reported being responsible for significantly more of the 9 diabetes



care standards than mental health nurses and support workers ( $p < 0.001$ ), psychiatrists ( $p < 0.001$ ) and allied and other health professions ( $p < 0.001$ ).

**Table 3. Healthcare professional perceived role in the management of T2DM in SMI**

|                                                    | This is part of my clinical role<br>n(%) | Average number of service users out of 10, with both type 2 diabetes and SMI that had been...?<br>M(SD) |
|----------------------------------------------------|------------------------------------------|---------------------------------------------------------------------------------------------------------|
| Given advice about weight management               | 226(82.78)                               | 5.84(3.28)                                                                                              |
| Had their BP monitored                             | 184(67.40)                               | 6.75(2.92)                                                                                              |
| Given general education about T2DM                 | 162(59.34)                               | 5.58(3.12)                                                                                              |
| Given personalised advice about diet and nutrition | 159(58.24)                               | 5.88(3.11)                                                                                              |
| Had their cholesterol monitored                    | 128(46.87)                               | 6.77(2.80)                                                                                              |
| Had their kidney function monitored                | 121(44.32)                               | 7.39(2.44)                                                                                              |
| Had their feet examined                            | 77(28.21)                                | 5.45(3.29)                                                                                              |
| Agreed personalised HbA1c target                   | 77(28.21)                                | 6.55(2.85)                                                                                              |
| Referred to retinopathy screening                  | 68(24.91)                                | 4.92(3.81)                                                                                              |

## Enablers

### *Individual factors*

Half of the sample reported that they knew how to manage T2DM in people with SMI, although allied and other health professionals felt significantly less able to manage T2DM in people with SMI than mental health nurses and support workers ( $p = 0.03$ ), GPs ( $p = 0.04$ ) and diabetologists and endocrinologists ( $p = 0.003$ ). Diabetologists and endocrinologists also felt more able than psychiatrists ( $p = 0.03$ ). Whilst 61% knew the local or national guidelines for managing T2DM, 75% reported that the likelihood of following these guidelines were high. Those working primarily within the physical health domain felt significantly more knowledgeable about these guidelines than mental health nurses and support workers ( $p \leq 0.001$ ), psychiatrists ( $p < 0.001$ ) and allied and other health professionals ( $p = 0.001$ ).

For 61% of the sample, care of T2DM had become a routine part of their role, more so for GPs than psychiatrists ( $p = 0.009$ ) and other allied health professionals ( $p = 0.009$ ), and 53% felt optimistic that they would be able to do it in the future. Although 91% believed that

1  
2  
3 managing T2DM in people with SMI is as important as managing their mental health, in  
4 practice 38% prioritised the management of mental health over the management of T2DM.  
5  
6

7  
8 For three quarters of respondents, being able to engage with service users was a key factor  
9 in being able to manage T2DM in this population. For 65% this included being able to tailor  
10 treatments, along with the service user's goals and targets (87%), depending on the client's  
11 needs and abilities. Physical health nurses were more likely to report doing this than  
12 psychiatrists ( $p < 0.01$ ). For half of the sample this was aided by having a plan and reviewing  
13 their practise to improve the delivery of future care.  
14  
15  
16  
17  
18  
19  
20  
21

22 Between 80 and 90% reported that poorly controlled T2DM in people with SMI further  
23 affected the service user's mental health and that if they didn't take steps to manage T2DM  
24 service users would come to serious harm.  
25  
26  
27  
28

### 29 *Organisational factors*

30  
31 Less than a quarter of participants felt they were encouraged to manage T2DM in people  
32 with SMI by incentives. Both mental health nurses and support workers, and GPs were  
33 however more likely to agree that incentives encouraged them compared to psychiatrists  
34 (MHN:  $p = 0.007$ ; GP:  $p = 0.01$ ). Overall 60% of the sample had sufficient time to manage  
35 this population, mental health nurses and support workers were however more likely to  
36 agree that this was the case than GPs ( $p = 0.04$ ). Between half and three quarters of  
37 respondents felt they had access to other professionals or worked within multidisciplinary  
38 teams who could assist them in caring for someone with T2DM and SMI, this included  
39 working with family members or carers. This could be better aided by integrated IT systems  
40 for 62% of participants.  
41  
42  
43  
44  
45  
46  
47  
48  
49  
50  
51  
52  
53  
54  
55  
56  
57  
58  
59  
60

### **Implementation of diabetes care**

For those participants who indicated that a diabetes care standard was part of their role (Table 3), on average 5 out of every 10 service users with diabetes and SMI were referred on for retinopathy screening; 5-6 were offered diabetes education, advice about weight management, diet and nutrition or had their feet examined; 6-7 had their BP monitored, personalised HbA1c targets agreed or their cholesterol monitored and 7 out of 10 had their kidney function monitored.

### **Predictors of implementing diabetes care**

Table 4 displays the results of Poisson and negative binomial regression analyses to predict implementation of the 9 diabetes care standards. The predictors shown in the table are those that were entered into the multiple regression analyses as they were significantly related to the outcomes in the univariate analysis.

**Table 4. Poisson and negative binomial regressions displaying predictors of diabetes care.**

| Outcome                                                                                 | Predictors                                                                              | Hypothesis Test    |              |             | Exp( $\beta$ ) | 95% Wald Confidence Interval for Exp( $\beta$ ) |             |
|-----------------------------------------------------------------------------------------|-----------------------------------------------------------------------------------------|--------------------|--------------|-------------|----------------|-------------------------------------------------|-------------|
|                                                                                         |                                                                                         | Wald $\chi^2$      | df           | p           |                | Lower                                           | Upper       |
| Education                                                                               | <b>(Intercept)</b>                                                                      | <b>6.07</b>        | <b>1.00</b>  | <b>0.02</b> | <b>2.39</b>    | <b>1.19</b>                                     | <b>4.80</b> |
|                                                                                         | I know the guidelines                                                                   | 0.38               | 1.00         | 0.90        | 0.99           | 0.90                                            | 1.10        |
|                                                                                         | <b>I know how to manage</b>                                                             | <b>5.51</b>        | <b>1.00</b>  | <b>0.04</b> | <b>1.15</b>    | <b>1.02</b>                                     | <b>1.30</b> |
|                                                                                         | I will follow the NICE diabetes guidelines                                              | 1.75               | 1.00         | 0.33        | 1.07           | 0.96                                            | 1.18        |
|                                                                                         | I have access to people with specialist diabetes knowledge                              | 0.48               | 1.00         | 0.76        | 1.02           | 0.94                                            | 1.10        |
|                                                                                         | I need more training in diabetes                                                        | 1.79               | 1.00         | 0.25        | 0.96           | 0.89                                            | 1.02        |
|                                                                                         | I am optimistic that I will be able to manage T2DM in people with SMI                   | 0.07               | 1.00         | 0.88        | 0.99           | 0.88                                            | 1.11        |
|                                                                                         | Managing T2DM in someone with SMI is a routine part of my job                           | 0.74               | 1.00         | 0.52        | 1.04           | 0.94                                            | 1.16        |
|                                                                                         | I tailor the treatment of T2DM in people with SMI depending on their needs              | 0.14               | 1.00         | 0.95        | 1.00           | 0.90                                            | 1.11        |
|                                                                                         | Managing T2DM in people with SMI worries or concerns me                                 | 1.55               | 1.00         | 0.26        | 0.95           | 0.88                                            | 1.03        |
|                                                                                         | I feel confident                                                                        | 0.62               | 1.00         | 0.64        | 0.96           | 0.84                                            | 1.10        |
|                                                                                         | I review how I manage T2DM in people with SMI, and identify ways in which I can improve | 0.24               | 1.00         | 0.86        | 1.01           | 0.92                                            | 1.11        |
|                                                                                         | <b>How many of the 9 diabetes care standard are you responsible for?</b>                | <b>10.52</b>       | <b>1.00</b>  | <b>0.00</b> | <b>1.06</b>    | <b>1.02</b>                                     | <b>1.10</b> |
|                                                                                         | Weight                                                                                  | <b>(Intercept)</b> | <b>16.34</b> | <b>1.00</b> | <b>0.00</b>    | <b>2.97</b>                                     | <b>1.75</b> |
| <b>Profession</b>                                                                       |                                                                                         | <b>24.18</b>       | <b>4.00</b>  | <b>0.00</b> | -              | -                                               | -           |
| Mental health nurses and support workers                                                |                                                                                         | 0.55               | 1.00         | 0.50        | 0.91           | 0.71                                            | 1.18        |
| Psychiatrists                                                                           |                                                                                         | 2.86               | 1.00         | 0.09        | 1.24           | 0.97                                            | 1.59        |
| GP                                                                                      |                                                                                         | 1.15               | 1.00         | 0.33        | 0.86           | 0.65                                            | 1.14        |
| Other nurses                                                                            |                                                                                         | 0.35               | 1.00         | 0.56        | 1.08           | 0.84                                            | 1.38        |
| I know the guidelines                                                                   |                                                                                         | 3.21               | 1.00         | 0.10        | 1.08           | 0.99                                            | 1.17        |
| I know how to manage                                                                    |                                                                                         | 1.55               | 1.00         | 0.24        | 1.06           | 0.96                                            | 1.17        |
| I have access to people with specialist diabetes knowledge                              |                                                                                         | 1.99               | 1.00         | 0.26        | 0.96           | 0.90                                            | 1.02        |
| I need more training in diabetes                                                        |                                                                                         | 1.10               | 1.00         | 0.34        | 0.97           | 0.92                                            | 1.03        |
| I feel confident                                                                        |                                                                                         | 0.21               | 1.00         | 0.80        | 1.01           | 0.92                                            | 1.11        |
| I review how I manage T2DM in people with SMI, and identify ways in which I can improve |                                                                                         | 1.84               | 1.00         | 0.32        | 1.05           | 0.97                                            | 1.13        |
| <b>How many of the 9 diabetes care standard are you responsible for?</b>                |                                                                                         | <b>7.00</b>        | <b>1.00</b>  | <b>0.02</b> | <b>1.04</b>    | <b>1.01</b>                                     | <b>1.07</b> |
| Diet                                                                                    |                                                                                         | <b>(Intercept)</b> | <b>11.62</b> | <b>1.00</b> | <b>0.01</b>    | <b>2.07</b>                                     | <b>1.36</b> |

| Outcome | Predictors                                                                                | Hypothesis Test |             |             | Exp( $\beta$ ) | 95% Wald Confidence Interval for Exp( $\beta$ ) |             |
|---------|-------------------------------------------------------------------------------------------|-----------------|-------------|-------------|----------------|-------------------------------------------------|-------------|
|         |                                                                                           | Wald $\chi^2$   | df          | p           |                | Lower                                           | Upper       |
|         | I know the guidelines                                                                     | 0.51            | 1.00        | 0.65        | 1.02           | 0.94                                            | 1.12        |
|         | I know how to manage                                                                      | 1.26            | 1.00        | 0.41        | 1.05           | 0.95                                            | 1.16        |
|         | <b>I feel optimistic about the health of my clients</b>                                   | <b>4.69</b>     | <b>1.00</b> | <b>0.04</b> | <b>1.08</b>    | <b>1.01</b>                                     | <b>1.17</b> |
|         | Managing T2DM in someone with SMI is a routine part of my job                             | 0.17            | 1.00        | 0.85        | 1.01           | 0.92                                            | 1.10        |
|         | I review how I manage T2DM in people with SMI, and identify ways in which I can improve   | 3.60            | 1.00        | 0.15        | 1.08           | 0.99                                            | 1.18        |
|         | How many of the 9 diabetes care standard are you responsible for?                         | 4.48            | 1.00        | 0.06        | 1.04           | 1.00                                            | 1.07        |
| BP      | <b>(Intercept)</b>                                                                        | <b>7.47</b>     | <b>1.00</b> | <b>0.01</b> | <b>2.43</b>    | <b>1.28</b>                                     | <b>4.58</b> |
|         | I will follow the NICE diabetes guidelines                                                | 0.14            | 1.00        | 0.79        | 1.01           | 0.94                                            | 1.09        |
|         | I have access to people with specialist diabetes knowledge                                | 0.33            | 1.00        | 0.79        | 1.01           | 0.94                                            | 1.09        |
|         | I need more training in diabetes                                                          | 4.24            | 1.00        | 0.05        | 0.94           | 0.88                                            | 1.00        |
|         | I am optimistic that I will be able to manage T2DM in people with SMI                     | 2.97            | 1.00        | 0.11        | 1.09           | 0.99                                            | 1.20        |
|         | <b>Managing T2DM in someone with SMI is a routine part of my job</b>                      | <b>5.33</b>     | <b>1.00</b> | <b>0.04</b> | <b>1.11</b>    | <b>1.01</b>                                     | <b>1.22</b> |
|         | I tailor the treatment of T2DM in people with SMI depending on their needs                | 0.51            | 1.00        | 0.53        | 0.97           | 0.89                                            | 1.06        |
|         | My patient's level of engagement is a key factor                                          | 3.14            | 1.00        | 0.09        | 1.07           | 0.99                                            | 1.16        |
|         | I feel confident                                                                          | 3.58            | 1.00        | 0.08        | 0.91           | 0.83                                            | 1.01        |
|         | If I didn't take steps to manage T2DM in people with SMI, they would come to serious harm | 3.76            | 1.00        | 0.11        | 1.09           | 1.00                                            | 1.18        |
|         | I review how I manage T2DM in people with SMI, and identify ways in which I can improve   | 0.54            | 1.00        | 0.60        | 1.02           | 0.95                                            | 1.11        |
|         | How many of the 9 diabetes care standard are you responsible for?                         | 4.36            | 1.00        | 0.06        | 1.03           | 1.00                                            | 1.06        |
| Feet    | (Intercept)                                                                               | 0.30            | 1.00        | 0.79        | 0.87           | 0.29                                            | 2.59        |
|         | I need more training in communication and negotiation skills                              | 4.98            | 1.00        | 0.05        | 1.11           | 1.01                                            | 1.22        |
|         | Diabetes goals and targets need to be tailored for people with SMI                        | 0.92            | 1.00        | 0.42        | 1.08           | 0.91                                            | 1.29        |
|         | <b>My patient's level of engagement is a key factor</b>                                   | <b>8.45</b>     | <b>1.00</b> | <b>0.01</b> | <b>1.21</b>    | <b>1.06</b>                                     | <b>1.38</b> |
|         | <b>How many of the 9 diabetes care standard are you responsible for?</b>                  | <b>7.44</b>     | <b>1.00</b> | <b>0.02</b> | <b>1.09</b>    | <b>1.02</b>                                     | <b>1.16</b> |
|         | Profession                                                                                | 9.36            | 4.00        | 0.08        | -              | -                                               | -           |
|         | Mental health nurses and support workers                                                  | 4.69            | 1.00        | 0.07        | 0.70           | 0.50                                            | 0.98        |
|         | <b>Psychiatrists</b>                                                                      | <b>4.73</b>     | <b>1.00</b> | <b>0.04</b> | <b>0.68</b>    | <b>0.47</b>                                     | <b>0.97</b> |
|         | <b>GP</b>                                                                                 | <b>5.36</b>     | <b>1.00</b> | <b>0.03</b> | <b>0.62</b>    | <b>0.42</b>                                     | <b>0.93</b> |
|         | Other nurses                                                                              | 1.30            | 1.00        | 0.27        | 0.85           | 0.64                                            | 1.13        |

| Outcome     | Predictors                                                            | Hypothesis Test |             |             | Exp( $\beta$ ) | 95% Wald Confidence Interval for Exp( $\beta$ ) |             |
|-------------|-----------------------------------------------------------------------|-----------------|-------------|-------------|----------------|-------------------------------------------------|-------------|
|             |                                                                       | Wald $\chi^2$   | df          | <i>p</i>    |                | Lower                                           | Upper       |
| Cholesterol | (Intercept)                                                           | <b>62.95</b>    | <b>1.00</b> | <b>0.00</b> | <b>4.83</b>    | <b>3.27</b>                                     | <b>7.12</b> |
|             | Working with people with SMI scares me                                | <b>6.97</b>     | <b>1.00</b> | <b>0.01</b> | <b>0.90</b>    | <b>0.83</b>                                     | <b>0.97</b> |
|             | My patient's level of engagement is a key factor                      | <b>8.68</b>     | <b>1.00</b> | <b>0.00</b> | <b>1.14</b>    | <b>1.05</b>                                     | <b>1.25</b> |
| HbA1c       | (Intercept)                                                           | <b>6.57</b>     | <b>1.00</b> | <b>0.01</b> | <b>2.42</b>    | <b>1.23</b>                                     | <b>4.77</b> |
|             | Diabetes goals and targets need to be tailored for people with SMI    | 1.57            | 1.00        | 0.23        | 1.08           | 0.96                                            | 1.22        |
|             | I am optimistic that I will be able to manage T2DM in people with SMI | <b>9.16</b>     | <b>1.00</b> | <b>0.00</b> | <b>1.20</b>    | <b>1.06</b>                                     | <b>1.34</b> |
| Retinopathy | (Intercept)                                                           | 0.34            | 1.00        | 0.59        | 1.79           | 0.24                                            | 13.35       |
|             | Diabetes goals and targets need to be tailored for people with SMI    | <b>5.55</b>     | <b>1.00</b> | <b>0.03</b> | <b>1.62</b>    | <b>1.08</b>                                     | <b>2.42</b> |
|             | I would be disciplined if I did not manage T2DM in people with SMI    | <b>6.14</b>     | <b>1.00</b> | <b>0.02</b> | <b>0.71</b>    | <b>0.53</b>                                     | <b>0.93</b> |
|             | Incentives, such as CQUINS or QOF points, encourage me                | <b>4.43</b>     | <b>1.00</b> | <b>0.04</b> | <b>0.77</b>    | <b>0.60</b>                                     | <b>0.98</b> |
|             | Family members and carers help me                                     | 2.05            | 1.00        | 0.16        | 1.22           | 0.93                                            | 1.60        |

## Education

The significant independent predictors of the number of people who were given general education about T2DM were knowledge about how to manage T2DM in people with SMI ( $p = 0.04$ ) and the degree to which diabetes care was part of their role ( $p < 0.001$ ). For every additional element of diabetes care that was part of a person's role there was a 6% (95% CI, 1.02 to 1.10) increase in the number of people referred to diabetes education ( $p = 0.003$ ). For every point increase in knowledge about managing diabetes there was a 15% (95% CI, 1.02 to 1.30) increase in number of people referred to diabetes education ( $p = 0.04$ ).

## Weight

The significant independent predictors of the number of people who had advice about weight management were the degree to which diabetes care was part of their role ( $p = 0.02$ ) and profession ( $p < 0.001$ ). For every additional element of diabetes care that was part of their role there was a 4% (95% CI, 1.01 to 1.07) increase in number of people advised about weight management. Psychiatrists reported advising more people about weight management than both mental health nurses and support workers (MD = 1.78, Std. Error = 0.44) and GPs (MD = 2.06, Std. Error = 0.64).

## Diet and nutrition

Optimism about the health of their clients ( $p = 0.04$ ) was the only independent predictor of the number of people who were advised about diet and nutrition. For every point increase in optimism about the health of their clients there was an 8% (95% CI, 1.01 to 1.17) increase in number of people given personalised advice about diet and nutrition.

## Monitoring BP

The degree to which diabetes care was a routine part of their role ( $p = 0.04$ ) was the only independent predictor of the number of people who had their BP monitored. For every point increase in the routine nature of diabetes care in a respondent's role there was an 11%

1  
2  
3 (95% CI, 1.02 to 1.22) increase in number of people given personalised advice about diet  
4 and nutrition.

### 5 6 7 Examining feet

8  
9  
10 The degree to which diabetes care was part of their role ( $p = 0.02$ ), the level of engagement  
11 from the service user ( $p = 0.01$ ) and profession (psychiatrists  $p = 0.04$  and GPs  $p = 0.03$   
12 compared with allied and other health professions) were the significant independent  
13 predictors of the number of people who had their feet examined. For every additional  
14 element of diabetes care that was part of their role there was a 9% (95% CI, 1.02 to 1.16)  
15 increase in number of people who had their feet checked. For every point increase  
16 engagement from the service user there was a 21% (95% CI, 1.06 to 1.38) increase in  
17 number of foot checks.  
18  
19  
20  
21  
22  
23  
24  
25

### 26 27 Agreeing a personalised HbA1c target and provide ongoing review

28  
29 How optimistic a person was in their ability to manage T2DM in people with SMI ( $p < 0.001$ )  
30 was the only independent predictor of the number of service users with whom HbA1c targets  
31 were set and ongoing reviews provided. For every point increase in how optimistic a person  
32 was in their ability to manage T2DM in people with SMI there was a 20% (95% CI, 1.07 to  
33 1.34) increase in number of service users with whom HbA1c targets were set and ongoing  
34 reviews provided.  
35  
36  
37  
38  
39  
40  
41

### 42 43 Monitoring cholesterol

44  
45 The level of engagement from the service user ( $p < 0.001$ ) and fear of working with someone  
46 with a SMI ( $p = 0.01$ ) were the independent predictors of the number of people who had their  
47 cholesterol monitored. For every point increase in the perceived impact of service user  
48 engagement there was a 14% (95% CI, 1.05 to 1.25) increase in the number of people  
49 whose cholesterol was monitored and for every point increase in fear there was a 10% (95%  
50 CI, 0.83 to 0.97) decrease in the in number of cholesterol checks performed.  
51  
52  
53  
54  
55  
56  
57  
58  
59  
60



### Monitoring kidney function

There were no significant univariate associations between the number of people in whom kidney function was monitored and any of the demographic, occupational or TDF factors.

### Referring to retinopathy screening

The belief that goals and targets need to be tailored for people with SMI ( $p = 0.03$ ), that they would be disciplined for not managing T2DM in people with SMI ( $p = 0.02$ ) and the need for incentives to encourage them to manage T2DM in this population ( $p = 0.04$ ) were the significant independent predictors of the number of people referred on for retinopathy screening. For every point increase in the belief that goals and targets need to be tailored for people with SMI there was a 62% (95% CI, 1.08 to 2.42) increase in number of people who were referred on for retinopathy screening. For every point increase in the belief they would be disciplined for not managing T2DM in people with SMI or that incentives would encourage them to manage T2DM in this population, there was a 29% (95% CI, 0.54 to 0.93) and 23% (95% CI, 0.60 to 0.98) decrease, respectively, in the number of people referred on for retinopathy screening.

### Intervention components

Table 5 highlights the TDF domains which were found to be either barriers or enablers to delivering T2DM care to people with SMI, along with the associated behaviour change techniques.[28, 29, 30] The techniques highlighted in column 2 are those intervention components selected as most appropriate for addressing the barrier or enabler identified in the study.

Table 5. Mapping of relevant TDF domains on intervention components

| RELEVANT TDF DOMAINS | BEHAVIOUR CHANGE TECHNIQUES                                     |
|----------------------|-----------------------------------------------------------------|
| Knowledge            | Information regarding behaviour, outcome<br>Health consequences |

|                                       |                                                                                                                                                                                                                                                                                                                                                                                                                                 |
|---------------------------------------|---------------------------------------------------------------------------------------------------------------------------------------------------------------------------------------------------------------------------------------------------------------------------------------------------------------------------------------------------------------------------------------------------------------------------------|
|                                       | <p>Biofeedback</p> <p>Antecedents</p> <p>Feedback on the behaviour</p>                                                                                                                                                                                                                                                                                                                                                          |
| Social professional role and identity | <p><b>Social process of encouragement, pressure and support</b></p>                                                                                                                                                                                                                                                                                                                                                             |
| Optimism                              | <p><b>Verbal persuasion to boost self-efficacy</b></p> <p><b>Focus on past success</b></p>                                                                                                                                                                                                                                                                                                                                      |
| Social influence                      | <p>Social process of encouragement, pressure and support</p> <p><b>Modelling/demonstration of the behaviour by others</b></p> <p>Social comparison</p> <p>Vicarious reinforcement</p> <p>Restructuring the social environment</p> <p>Identification of self as a role model</p> <p>Social reward</p>                                                                                                                            |
| Emotion                               | <p>Stress management</p> <p>Coping skills</p> <p><b>Reduce negative emotions</b></p> <p>Emotional consequences</p> <p><b>Self-assessment of affective consequences</b></p> <p>Social support (emotional)</p>                                                                                                                                                                                                                    |
| Goals                                 | <p>Goal/target specified: behaviour or outcome</p> <p>Contract</p> <p>Rewards; incentives (Inc. self-evaluation)</p> <p>Graded task, starting with easy tasks</p> <p><b>Increasing skills: problem-solving, decision-making, goal-setting</b></p> <p>Social process of encouragement, pressure and support</p> <p>Persuasive communication</p> <p>Information regarding behaviour, outcome</p> <p>Motivational interviewing</p> |

|               |                                                                                                                                                                                                                                                                                                                                                                                                         |
|---------------|---------------------------------------------------------------------------------------------------------------------------------------------------------------------------------------------------------------------------------------------------------------------------------------------------------------------------------------------------------------------------------------------------------|
|               | Review of outcome goal(s)                                                                                                                                                                                                                                                                                                                                                                               |
|               | Review of behaviour goal(s)                                                                                                                                                                                                                                                                                                                                                                             |
|               | Action planning (including implementation intentions)                                                                                                                                                                                                                                                                                                                                                   |
| Reinforcement | Threat<br><b>Self-reward</b><br>Differential reinforcement<br>Incentive<br>Thinning<br>Negative reinforcement<br>Shaping<br>Counter conditioning<br>Discrimination training<br>Material reward<br>Social reward<br>Non-specific reward<br>Response cost<br><b>Anticipation of future rewards or removal of punishment</b><br>Punishment<br>Extinction<br>Classical conditioning<br>Counter conditioning |

## DISCUSSION

We found that delivery of diabetes care for people with SMI is influenced by a range of individual and organisational factors. Although there were clear differences in the extent of involvement, mental health professionals noted active engagement in many of the aspects of diabetes care, as identified elsewhere in the literature.[14, 13, 15] Confirming our qualitative findings[16] however, specialist mental health clinicians reported being responsible for fewer

1  
2  
3 diabetes care standards than primary care and specialist diabetes clinicians. This contests  
4 the idea that there is confusion and role ambiguity about the responsibility for monitoring and  
5 supporting T2DM in SMI.[13] In fact this survey indicates clear boundaries, but when  
6  
7 diabetes management is perceived to be a greater part of a person's role, more service  
8  
9 users are treated according to recommended standards. This clearly reflects conflict  
10  
11 between the shared care approach,[21, 20] which promotes mental health professionals  
12  
13 broadening their deliverer to address physical and mental health.[19] This indicates a need  
14  
15 for NHS trusts to define roles and responsibilities more clearly. This is particularly relevant  
16  
17 given that only a third of the sample felt that there was a definite focus in their trust on the  
18  
19 management of T2DM in people with SMI.  
20  
21  
22  
23

24 Although 54% of respondents had received training in diabetes, only a quarter had been  
25  
26 trained in how to manage the condition in people with SMI, and this figure did not differ  
27  
28 between the professions. Despite receiving training, those working in mental health settings  
29  
30 felt less knowledgeable about the guidelines for T2DM and had a desire for more training in  
31  
32 how to manage the condition. This supports the findings of studies conducted in other UK  
33  
34 mental health trusts[31, 14, 13, 15, 32] and theory-driven qualitative work that formed the  
35  
36 basis of this study.[16] Importantly, this lack of knowledge and skills meant that healthcare  
37  
38 professionals treated fewer service users according to recommended diabetes care  
39  
40 standards. Evaluations of diabetes training and educational packages for mental health  
41  
42 clinicians are limited. Improvements in understanding and knowledge of diabetes have been  
43  
44 reported; however, these findings are based on a small scale, single group study consisting  
45  
46 of primarily mental health students and hence fail to explore its impact on practice.[33] Any  
47  
48 such programme will need to consider the barriers to attending training of this nature,  
49  
50 including a lack of management support, staff shortages, the discretionary nature of  
51  
52 attending and lack of funding[34] along with the challenges of using psychosocial  
53  
54 interventions to change practice.[35, 36, 37]  
55  
56  
57  
58  
59  
60

1  
2  
3 Being able to communicate and engage with service users was identified as an important  
4 facilitator in delivering effective diabetes care. As opposed to those working in mental health  
5 settings, primary care and diabetes specialists felt they needed more training in  
6 communication and negotiation skills in order for them to be able to motivate their clients and  
7 deliver recommended care. Difficulties motivating service users with diabetes to self-manage  
8 has been identified elsewhere in the literature[13, 32, 38] and presents an ongoing challenge  
9 for interventions aimed at changing the behaviour of service users with T2DM.[39]

10 Respondents stressed the importance of tailoring diabetes treatment, along with any goals  
11 and targets, to the needs and abilities of the service user. Mental health staff report  
12 experiencing difficulties engaging service users in their diabetes care, due to limitations in  
13 cognitive and executive functioning.[32, 38] Together this highlights the importance of  
14 training healthcare professionals to also be able to identify suitable times within the service  
15 user's journey when they may need more support in order for them to self-manage  
16 effectively. The challenges of communicating and engaging service users in their care, may  
17 also be precipitated or be a consequence of the fear some healthcare professionals  
18 experience about working with someone with a SMI. This further supports research that  
19 shows some clinicians experience discomfort in dealing with people with mental illness  
20 leading to physical diagnoses often being missed.[40]

21  
22  
23  
24  
25  
26  
27  
28  
29  
30  
31  
32  
33  
34  
35  
36  
37  
38  
39  
40 Only a third of the sample were optimistic about the health of their clients with T2DM, and a  
41 majority of respondents lacked optimism about their ability to manage T2DM in people with  
42 SMI. This led to fewer service users receiving the recommended diabetes care standards.  
43 Given the importance of hope and optimism in the process of personal recovery in mental  
44 health[17] this could be an important focus for interventions aimed at improving diabetes  
45 care and outcomes for service users, with the potential for wider benefits. The powerful  
46 position that healthcare professionals hold as hope-inspiring role models[17] can either  
47 enhance or diminish the hope of service users.[41, 42] This is particularly important  
48 considering that practitioner hope has been found to influence the outcomes of therapy over  
49  
50  
51  
52  
53  
54  
55  
56  
57

1  
2  
3 and above client hope[43] and that cultivating hope in the context of T2DM is also  
4 associated with increased adherence.[44]  
5  
6  
7

8  
9 In line with the findings of our qualitative work[16] a third of respondents felt that they would  
10 be disciplined if they did not manage diabetes in people with SMI and approximately a  
11 quarter felt that incentives would encourage them. Despite this, the threat of being  
12 disciplined and need for incentives appeared to have a counterintuitive effect in the multiple  
13 regression analyses. The greater the perceived threat of being disciplined and a stronger  
14 belief that incentives would encourage them to manage diabetes, the fewer service users  
15 received recommended diabetes care. This suggests that perceived threat of being  
16 disciplined and possibly the discordance between desire and receipt of incentives, was  
17 having a paralysing effect on practice. Blame and punishment are felt by healthcare  
18 professionals to be part of health service culture, particularly when someone is involved in  
19 an error, near miss or incident.[45] This however can lead to disempowerment, disunity and  
20 a lack of compassion in the workforce.[46] Rather than allowing people to experiment  
21 without fear of reprisal and view errors as learning opportunities,[46] the workforce are  
22 fearful of personal accountability, litigation and complaints.[47] Although participants felt that  
23 incentives would improve their practice, this study and the evidence for pay-for-performance  
24 systems, such as QOF, in changing healthcare professional behaviour is limited and there is  
25 insufficient evidence for their impact on patient health outcomes.[48]  
26  
27  
28  
29  
30  
31  
32  
33  
34  
35  
36  
37  
38  
39  
40  
41  
42  
43

44 Taken together, our findings suggest that a number of strategies could be implemented to  
45 improve the care offered to people with diabetes and SMI, and as a consequence address  
46 the inequalities experienced by this population. These techniques include increasing  
47 healthcare professionals' knowledge about the guidelines for managing T2DM in people with  
48 SMI, increasing awareness of their role and responsibilities towards this patient group,  
49 boosting self-efficacy for addressing the needs of these clients, modelling or demonstrating  
50 how healthcare professionals can work with clients who are less engaged in the care of their  
51  
52  
53  
54  
55  
56  
57  
58  
59  
60

1  
2  
3 diabetes, reduce fear of working with people with a SMI, increase skills in being able to tailor  
4 goals and targets to the needs of the individual service user and eradicate fear of being  
5 disciplined. Identification of these barriers and enablers, and subsequent BCTs now allows  
6 us to move towards development, feasibility testing and piloting of a new approach to  
7 delivering care.[22]  
8  
9  
10  
11  
12  
13

14 The study had a number of limitations. The need to adjust p-values in studies using multiple  
15 outcome measures has been debated widely in the literature.[49] The number of outcomes  
16 measures considered as a family-wise hypothesis has however not been defined and  
17 although by not adjusting this may increase the likelihood of a type I error, adjusting would  
18 increase the chance of type II errors which are no less important. We therefore acknowledge  
19 that some of the findings of this study may have been due to chance. As with any online  
20 survey there are concerns about the representativeness of the sample.[50] There was a bias  
21 in responses towards those who were likely to be more interested in the topic, with  
22 significantly more responses from those working within mental health settings. This raises a  
23 broader question about whether SMI is a priority or issue for diabetes specialists. Due to the  
24 online recruitment methods it was not possible estimate the response rate. In comparison to  
25 the target population this sample represents only 0.3% of the population therefore raising  
26 concerns about the generalizability of the findings to the broader population. Despite the  
27 recruitment strategy aiming to target a range of healthcare professionals GPs, diabetologists  
28 and physical health nurses are under-represented. The data from this study focused on  
29 predicting delivery of diabetes care to people with SMI by healthcare professionals who  
30 stated this was part of their role. It may have however, been the case that elements of  
31 diabetes care could have been undertaken by a professional even when it was not explicitly  
32 part of their job. Our results are also only a snapshot of the experiences and beliefs of  
33 healthcare professionals; as the care of diabetes in people with SMI becomes of greater  
34 priority and services begin to develop, these views may change.  
35  
36  
37  
38  
39  
40  
41  
42  
43  
44  
45  
46  
47  
48  
49  
50  
51  
52  
53  
54  
55  
56  
57  
58  
59  
60

## COMPETING INTERESTS

We have read and understood BMJ policy on declaration of interests and declare the following interests: we have none.

## FUNDING

This work was supported by Barts Charity, grant number 477/2314.

## AUTHOR CONTRIBUTIONS

HM - made a substantial contribution to the conception and design of the study, the data analysis, interpretation of the data, created a first draft of the manuscript, approved the final version and agrees to be accountable for all aspects of the work.

FLG - made a substantial contribution to the conception and design of the study, collection and interpretation of the data, commented on drafts of the manuscript, approved the final version and agrees to be accountable for all aspects of the work.

MH, AS, JC, JJ, CF and KM all made a substantial contribution to the conception and design of the study, interpretation of the data, commented on drafts of the manuscript, approved the final version and agree to be accountable for all aspects of the work.

## DATA SHARING

There is no other additional unpublished data to be shared.

## REFERENCE LIST

1 International Diabetes Federation. International Diabetes Federation Diabetes Atlas 7th edition. 2015.

2 Osborn DP, Wright CA, Levy G et al. Relative risk of diabetes, dyslipidaemia, hypertension and the metabolic syndrome in people with severe mental illnesses: systematic review and metaanalysis. *BMC Psychiatry* 2008;8:84.

3 De Hert M, Dekker JM, Wood D et al. Cardiovascular disease and diabetes in people with severe mental illness position statement from the European Psychiatric Association (EPA),



1  
2  
3 supported by the European Association for the Study of Diabetes (EASD) and the European  
4 Society of Cardiology (ESC). *Eur Psychiatry* 2009;24:412-24.

5  
6 4 Alvarez-Jimenez M, Hetrick SE, Gonzalez-Blanch C et al. Non-pharmacological  
7 management of antipsychotic-induced weight gain: systematic review and meta-analysis of  
8 randomised controlled trials. *Br J Psychiatry* 2008;193:101-7.

9  
10  
11 5 Lawrence D, Mitrou F, and Zubrick SR. Smoking and mental illness: results from  
12 population surveys in Australia and the United States. *BMC Public Health* 2009;9:285.

13  
14  
15 6 Vinogradova Y, Coupland C, Hippisley-Cox J et al. Effects of severe mental illness on  
16 survival of people with diabetes. *Br J Psychiatry* 2010;197:272-7.

17  
18  
19 7 Becker T and Hux J. Risk of acute complications of diabetes among people with  
20 schizophrenia in Ontario, Canada. *Diabetes Care* 2011;34:398-402.

21  
22  
23 8 McGinty EE, Baller J, Azrin ST et al. Quality of medical care for persons with serious  
24 mental illness: A comprehensive review. *Schizophr Res* 2015;165:227-35.

25  
26  
27 9 Scott D, Platania-Phung C, and Happell B. Quality of Care for Cardiovascular Disease and  
28 Diabetes Amongst Individuals with Serious Mental Illness and Those Using Antipsychotic  
29 Medications. *J Healthc Qual* 2012;34:15-21.

30  
31  
32 10 Rathmann W, Pscherer S, Konrad M et al. Diabetes treatment in people with type 2  
33 diabetes and schizophrenia: Retrospective primary care database analyses. *Prim Care  
34 Diabetes* 2016;10:36-40.

35  
36  
37 11 Mathur R, Hull SA, Boomla K et al. Ethnic differences in primary care management of  
38 diabetes and cardiovascular disease in people with serious mental illness. *Br J Gen Pract*  
39 2012;62:e582-e588.

40  
41  
42 12 Mitchell AJ, Malone D, and Carney Doebbeling C. Quality of medical care for people with  
43 and without comorbid mental illness and substance misuse: systematic review of  
44 comparative studies. *Br J Psychiatry* 2009;194:491-9.

45  
46  
47 13 Robson D and Haddad M. Mental health nurses' attitudes towards the physical health  
48 care of people with severe and enduring mental illness: the development of a measurement  
49 tool. *Int J Nurs Stud* 2012;49:72-83.

- 1  
2  
3 14 Nash M. Mental health nurses' diabetes care skills - a training needs analysis. *Br J Nurs*  
4 2009;18:628-30.  
5  
6 15 Howard L and Gamble C. Supporting mental health nurses to address the physical health  
7 needs of people with serious mental illness in acute inpatient care settings. *J Psychiatr Ment*  
8 *Health Nurs* 2011;18:105-12.  
9  
10 16 McBain H, Mulligan K, Lamontagne-Godwin F et al. Implementation of recommended  
11 type 2 diabetes care for people with severe mental illness - a qualitative exploration with  
12 healthcare professionals. *BMC Psychiatry* 2016;Jul 8;16:222.  
13  
14 17 Leamy M, Bird V, Le BC et al. Conceptual framework for personal recovery in mental  
15 health: systematic review and narrative synthesis. *Br J Psychiatry* 2011;199:445-52.  
16  
17 18 Kilbourne AM, Pirraglia PA, Lai Z et al. Quality of general medical care among patients  
18 with serious mental illness: does colocation of services matter? *Psychiatr Serv* 2011;62:922-  
19 8.  
20  
21 19 World Health Organization. *Mental Health Action Plan 2013-2020*. 2013.  
22  
23 20 NHS Diabetes. *Commissioning Mental Health and Diabetes Services*. 2011.  
24  
25 21 National Institute for Health and Care Excellence. *Psychosis and schizophrenia in adults:*  
26 *prevention and management*. 2014.  
27  
28 22 Craig P, Dieppe P, Macintyre S et al. Developing and evaluating complex interventions:  
29 the new Medical Research Council guidance. *BMJ* 2008;337.  
30  
31 23 General Medical Council. *List of Registered Medical Practitioners - statistics*. 2017.  
32  
33 24 NHS Digital. *Provisional NHS Hospital & Community Health Service (HCHS) monthly*  
34 *workforce statistics*. 2017.  
35  
36 25 Gosden C, James J, Anderson U et al. UK workforce survey of DSNs and nurse  
37 consultants. *J Diabetes Nurs* 2010;14:250-7.  
38  
39 26 Cane, J., O'Connor, D. and Michie, S., 2012. Validation of the theoretical domains  
40 framework for use in behaviour change and implementation research. *Implement Sci*, 7(1),  
41 p.37.  
42  
43 27 National Institute for Health and Care Excellence. *Diabetes in adults (QS6)*. 2011.  
44  
45  
46  
47  
48  
49  
50  
51  
52  
53  
54  
55  
56  
57  
58  
59  
60

- 1  
2  
3 28 Michie, S., Atkins, L. and West, R., 2014. The behaviour change wheel: a guide to  
4 designing interventions. Silverback Publishing, Great Britain.  
5  
6  
7 29 Michie S., Johnston, M., Francis, J. et al. From theory to intervention: mapping  
8 theoretically derived behavioural determinants to behaviour change techniques. Appl  
9 Psychol 2008;57:660-80.  
10  
11  
12 30 Cane J, Richardson M, Johnston M et al. From lists of behaviour change techniques  
13 (BCTs) to structured hierarchies: comparison of two methods of developing a hierarchy of  
14 BCTs. Br J Health Psychol 2015;20:130-50.  
15  
16  
17  
18 31 Ward D. Improving physical health care in a mental health trust. Nurs Times  
19 2005;101:32-3.  
20  
21  
22 32 Hultsjö S. Mental healthcare staff's knowledge and experiences of diabetes care for  
23 persons with psychosis: a qualitative interview study. Prim Health Care Res Dev  
24 2013;14:281-92.  
25  
26  
27  
28 33 Hemingway S, Trotter F, Stephenson J et al. Diabetes: increasing the knowledge base of  
29 mental health nurses. Br J Nurs 2013;22:991-6.  
30  
31  
32 34 Nash M. Physical care skills: a training needs analysis of inpatient and community mental  
33 health nurses. Mental Health Practice 2005;9:20-3.  
34  
35  
36 35 Brooker C and Brabban A. Effective training in psychosocial interventions for work with  
37 people with serious mental health problems. Mental Health Rev 2017;11:7-14.  
38  
39  
40 36 Stanbridge RI and Burbach FR. Enhancing working partnerships with carers and families:  
41 a strategy and associated training programme. Mental Health Rev 2004;9:32-7.  
42  
43  
44 37 Slade M, Bird V, Clarke E et al. Supporting recovery in patients with psychosis using  
45 adult mental health teams (REFOCUS): a multi-site cluster randomised controlled trial.  
46 Lancet Psychiatry 2015;2:503-14.  
47  
48  
49 38 Hultsjö S and Hjelm K. Community health-care staff's experiences of support to prevent  
50 type 2 diabetes among people with psychosis: An interview study with health staff. Int J  
51 Mental Health Nurses 2012;21:480-9.  
52  
53  
54  
55  
56  
57  
58  
59  
60

- 1  
2  
3 39 McBain H, Mulligan K, Haddad M et al. Self management interventions for type 2  
4 diabetes in adult people with severe mental illness. *Cochrane Database Syst Rev*  
5 2016;4:CD011361.  
6  
7  
8 40 Jones S, Howard L, and Thornicroft G. Diagnostic overshadowing': worse physical health  
9 care for people with mental illness. *Acta Psychiatr Scand* 2008;118:169-71.  
10  
11 41 Hobbs M and Baker M. Hope for recovery - how clinicians may facilitate this in their work.  
12 *J Ment Health* 2012;21:144-53.  
13  
14 42 Niebieszczanski RJ, Dent H, and McGowan A. 'Your personality is the intervention': a  
15 grounded theory of mental health nurses' beliefs about hope and experiences of fostering  
16 hope within a secure setting. *J Forens Psychiatry Psychol* 2016;27:419-42.  
17  
18 43 Coppock TE, Owen JJ, Zagarskas E et al. The relationship between therapist and client  
19 hope with therapy outcomes. *Psychother Res* 2010;20:619-26.  
20  
21 44 Makarem SC, Smith MF, Mudambi SM et al. Why People Do Not Always Follow the  
22 Doctor's Orders: The Role of Hope and Perceived Control. *J Consum Aff* 2014;48:457-85.  
23  
24 45 Dixon-Woods M, Baker R, Charles K et al. Culture and behaviour in the English National  
25 Health Service: overview of lessons from a large multimethod study. *BMJ Qual Saf*  
26 2013;23:106-15.  
27  
28 46 de Zulueta PC. Developing compassionate leadership in health care: an integrative  
29 review. *J Healthc Leadersh* 2016;8:1-10.  
30  
31 47 Goodman B. Risk, rationality and learning for compassionate care; The link between  
32 management practices and the 'lifeworld' of nursing. *Nurse Educ Today* 2014;34:1265-8.  
33  
34 48 Mendelson A, Kondo K, Damberg C et al. The Effects of Pay-for-Performance Programs  
35 on Health, Health Care Use, and Processes of Care. *Ann Intern Med* 2017;166:341-53.  
36  
37 49 Feise RJ. Do multiple outcome measures require p-value adjustment? *BMC Med Res*  
38 *Methodol* 2002;2:8.  
39  
40 50 Whitehead LC. Methodological and ethical issues in Internet-mediated research in the  
41 field of health: an integrated review of the literature. *Soc Sci Med* 2007;65:782-91.  
42  
43  
44  
45  
46  
47  
48  
49  
50  
51  
52  
53  
54  
55  
56  
57  
58  
59  
60

1  
2  
3  
4  
5  
6  
7  
8  
9  
10  
11  
12  
13  
14  
15  
16  
17  
18  
19  
20  
21  
22  
23  
24  
25  
26  
27  
28  
29  
30  
31  
32  
33  
34  
35  
36  
37  
38  
39  
40  
41  
42  
43  
44  
45  
46  
47  
48  
49  
50  
51  
52  
53  
54  
55  
56  
57  
58  
59  
60

Figure 1. Barriers and enablers to delivery of T2DM care in people with SMI (n = 273)

For peer review only

1  
2  
3  
4  
5  
6  
7  
8  
9  
10  
11  
12  
13  
14  
15  
16  
17  
18  
19  
20  
21  
22  
23  
24  
25  
26  
27  
28  
29  
30  
31  
32  
33  
34  
35  
36  
37  
38  
39  
40  
41  
42  
43  
44  
45  
46  
47  
48  
49  
50  
51  
52  
53  
54  
55  
56  
57  
58  
59  
60

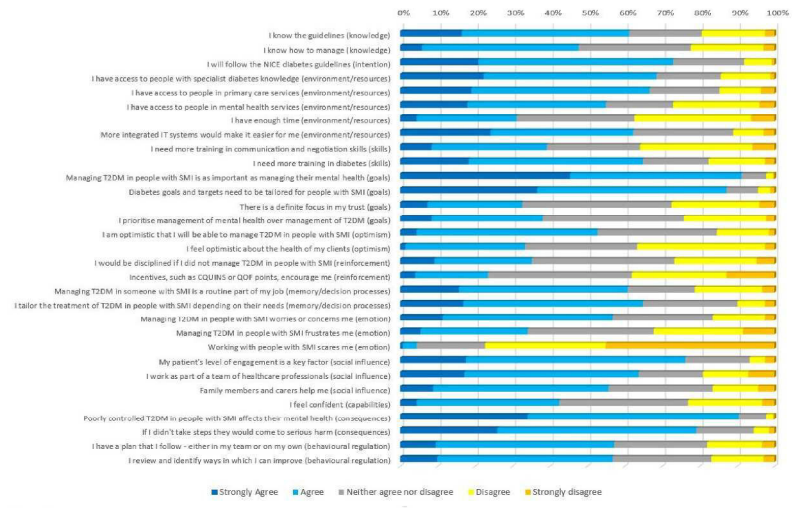

Figure 1.

Figure 1. Barriers and enablers to delivery of T2DM care in people with SMI (n = 273)

297x210mm (300 x 300 DPI)

1  
2  
3  
4  
5  
6  
7  
8  
9  
10  
11  
12  
13  
14  
15  
16  
17  
18  
19  
20  
21  
22  
23  
24  
25  
26  
27  
28  
29  
30  
31  
32  
33  
34  
35  
36  
37  
38  
39  
40  
41  
42  
43  
44  
45  
46  
47  
48  
49  
50  
51  
52  
53  
54  
55  
56  
57  
58  
59  
60

## Supplementary File A.

### Questionnaire to Measures the Barriers and Enablers to Delivering Diabetes Care in People with SMI (*TDF domain*)

|                                                                                                                                                                  |                             |                          |
|------------------------------------------------------------------------------------------------------------------------------------------------------------------|-----------------------------|--------------------------|
| I know the guidelines, national or local, for managing type 2 diabetes ( <i>knowledge</i> )                                                                      | Strong Agree                | <input type="checkbox"/> |
|                                                                                                                                                                  | Agree                       | <input type="checkbox"/> |
|                                                                                                                                                                  | Neither Agree nor Disagree  | <input type="checkbox"/> |
|                                                                                                                                                                  | Disagree                    | <input type="checkbox"/> |
|                                                                                                                                                                  | Strongly Disagree           | <input type="checkbox"/> |
| I know how to manage type 2 diabetes in people with SMI ( <i>knowledge</i> )                                                                                     | Strong Agree                | <input type="checkbox"/> |
|                                                                                                                                                                  | Agree                       | <input type="checkbox"/> |
|                                                                                                                                                                  | Neither Agree nor Disagree  | <input type="checkbox"/> |
|                                                                                                                                                                  | Disagree                    | <input type="checkbox"/> |
|                                                                                                                                                                  | Strongly Disagree           | <input type="checkbox"/> |
| How likely is it that you will follow the NICE diabetes guidelines for your patients who have type 2 diabetes and SMI? ( <i>intention</i> )                      | Very Likely                 | <input type="checkbox"/> |
|                                                                                                                                                                  | Likely                      | <input type="checkbox"/> |
|                                                                                                                                                                  | Neither Likely nor Unlikely | <input type="checkbox"/> |
|                                                                                                                                                                  | Unlikely                    | <input type="checkbox"/> |
|                                                                                                                                                                  | Very Unlikely               | <input type="checkbox"/> |
| I have access to people with specialist diabetes knowledge to help me manage type 2 diabetes in people with SMI ( <i>environmental context &amp; resources</i> ) | Strong Agree                | <input type="checkbox"/> |
|                                                                                                                                                                  | Agree                       | <input type="checkbox"/> |
|                                                                                                                                                                  | Neither Agree nor Disagree  | <input type="checkbox"/> |
|                                                                                                                                                                  | Disagree                    | <input type="checkbox"/> |
|                                                                                                                                                                  | Strongly Disagree           | <input type="checkbox"/> |
| I have access to people in primary care services for my patients with type 2 diabetes and SMI ( <i>environmental context &amp; resources</i> )                   | Strong Agree                | <input type="checkbox"/> |
|                                                                                                                                                                  | Agree                       | <input type="checkbox"/> |
|                                                                                                                                                                  | Neither Agree nor Disagree  | <input type="checkbox"/> |
|                                                                                                                                                                  | Disagree                    | <input type="checkbox"/> |
|                                                                                                                                                                  | Strongly Disagree           | <input type="checkbox"/> |

1  
2  
3  
4  
5  
6  
7  
8  
9  
10  
11  
12  
13  
14  
15  
16  
17  
18  
19  
20  
21  
22  
23  
24  
25  
26  
27  
28  
29  
30  
31  
32  
33  
34  
35  
36  
37  
38  
39  
40  
41  
42  
43  
44  
45  
46  
47  
48  
49  
50  
51  
52  
53  
54  
55  
56  
57  
58  
59  
60

I have access to people in mental health services for my patients with type 2 diabetes and SMI (*environmental context & resources*)

- Strong Agree
- Agree
- Neither Agree nor Disagree
- Disagree
- Strongly Disagree

I have enough time to manage type 2 diabetes in people with SMI (*environmental context & resources*)

- Strong Agree
- Agree
- Neither Agree nor Disagree
- Disagree
- Strongly Disagree

More integrated IT systems would make it easier for me to manage type 2 diabetes in people with SMI (*environmental context & resources*)

- Strong Agree
- Agree
- Neither Agree nor Disagree
- Disagree
- Strongly Disagree

I need more training in communication and negotiation skills in order to manage type 2 diabetes in people with SMI (*skills*)

- Strong Agree
- Agree
- Neither Agree nor Disagree
- Disagree
- Strongly Disagree

I need more training in diabetes in order to manage type 2 diabetes in people with SMI (*skills*)

- Strong Agree
- Agree
- Neither Agree nor Disagree
- Disagree
- Strongly Disagree



1  
2  
3  
4  
5  
6  
7  
8  
9  
10  
11  
12  
13  
14  
15  
16  
17  
18  
19  
20  
21  
22  
23  
24  
25  
26  
27  
28  
29  
30  
31  
32  
33  
34  
35  
36  
37  
38  
39  
40  
41  
42  
43  
44  
45  
46  
47  
48  
49  
50  
51  
52  
53  
54  
55  
56  
57  
58  
59  
60

Managing patients' type 2 diabetes in people with SMI is as important as managing their mental health (*goal*)

Strong Agree   
Agree   
Neither Agree nor Disagree   
Disagree   
Strongly Disagree

Diabetes goals and targets need to be tailored for people with SMI (*goal*)

Strong Agree   
Agree   
Neither Agree nor Disagree   
Disagree   
Strongly Disagree

There is a definite focus in my trust on managing type 2 diabetes in people with SMI (*goal*)

Strong Agree   
Agree   
Neither Agree nor Disagree   
Disagree   
Strongly Disagree

I prioritise management of mental health over management of type 2 diabetes in people with type 2 diabetes and SMI (*goal*)

Strong Agree   
Agree   
Neither Agree nor Disagree   
Disagree   
Strongly Disagree

I am optimistic that I will be able to manage type 2 diabetes in people with SMI (*optimism*)

Strong Agree   
Agree   
Neither Agree nor Disagree   
Disagree   
Strongly Disagree

1  
2  
3 I feel optimistic about the health of my patients with type 2  
4 diabetes and SMI (*optimism*)

Strongly Agree

Agree

Neither Agree nor Disagree

Disagree

Strongly Disagree

11  
12  
13 I would be disciplined if I did not manage type 2 diabetes in  
14 people with SMI (*reinforcement*)

Strongly Agree

Agree

Neither Agree nor Disagree

Disagree

Strongly Disagree

21  
22  
23 Incentives, such as CQUINS or QOF points, encourage me to  
24 manage type 2 diabetes in people with SMI (*reinforcement*)

Strongly Agree

Agree

Neither Agree nor Disagree

Disagree

Strongly Disagree

28  
29  
30 Managing type 2 diabetes in someone with SMI is a routine  
31 part of my job (*memory, attention and decision*)

Strongly Agree

Agree

Neither Agree nor Disagree

Disagree

Strongly Disagree

32  
33  
34 I tailor the treatment of type 2 diabetes in people with SMI  
35 depending on their needs (*memory, attention and decision*)

Strongly Agree

Agree

Neither Agree nor Disagree

Disagree

Strongly Disagree

1  
2  
3  
4  
5  
6  
7  
8  
9  
10  
11  
12  
13  
14  
15  
16  
17  
18  
19  
20  
21  
22  
23  
24  
25  
26  
27  
28  
29  
30  
31  
32  
33  
34  
35  
36  
37  
38  
39  
40  
41  
42  
43  
44  
45  
46  
47  
48  
49  
50  
51  
52  
53  
54  
55  
56  
57  
58  
59  
60

Managing type 2 diabetes in people with SMI worries or concerns me (*emotion*)

Strongly Agree

Agree

Neither Agree nor Disagree

Disagree

Strongly Disagree

Managing type 2 diabetes in people with SMI frustrates me (*emotion*)

Strongly Agree

Agree

Neither Agree nor Disagree

Disagree

Strongly Disagree

Working with people with SMI scares me (*emotion*)

Strongly Agree

Agree

Neither Agree nor Disagree

Disagree

Strongly Disagree

My patient's level of engagement is a key factor in how I manage the type 2 diabetes in people with SMI (*social influence*)

Strongly Agree

Agree

Neither Agree nor Disagree

Disagree

Strongly Disagree

I work as part of a team of healthcare professionals to help manage type 2 diabetes in people with SMI (*social influence*)

Strongly Agree

Agree

Neither Agree nor Disagree

Disagree

Strongly Disagree

1  
2  
3  
4  
5  
6  
7  
8  
9  
10  
11  
12  
13  
14  
15  
16  
17  
18  
19  
20  
21  
22  
23  
24  
25  
26  
27  
28  
29  
30  
31  
32  
33  
34  
35  
36  
37  
38  
39  
40  
41  
42  
43  
44  
45  
46  
47  
48  
49  
50  
51  
52  
53  
54  
55  
56  
57  
58  
59  
60

|                                                                                                                                                   |                            |                          |
|---------------------------------------------------------------------------------------------------------------------------------------------------|----------------------------|--------------------------|
| Family members and carers help me manage type 2 diabetes in people with SMI ( <i>social influence</i> )                                           | Strongly Agree             | <input type="checkbox"/> |
|                                                                                                                                                   | Agree                      | <input type="checkbox"/> |
|                                                                                                                                                   | Neither Agree nor Disagree | <input type="checkbox"/> |
|                                                                                                                                                   | Disagree                   | <input type="checkbox"/> |
|                                                                                                                                                   | Strongly Disagree          | <input type="checkbox"/> |
| I feel confident about managing type 2 diabetes in people with SMI ( <i>beliefs about capabilities</i> )                                          | Strongly Agree             | <input type="checkbox"/> |
|                                                                                                                                                   | Agree                      | <input type="checkbox"/> |
|                                                                                                                                                   | Neither Agree nor Disagree | <input type="checkbox"/> |
|                                                                                                                                                   | Disagree                   | <input type="checkbox"/> |
|                                                                                                                                                   | Strongly Disagree          | <input type="checkbox"/> |
| Poorly controlled type 2 diabetes in people with SMI affects their mental health ( <i>beliefs about consequences</i> )                            | Strongly Agree             | <input type="checkbox"/> |
|                                                                                                                                                   | Agree                      | <input type="checkbox"/> |
|                                                                                                                                                   | Neither Agree nor Disagree | <input type="checkbox"/> |
|                                                                                                                                                   | Disagree                   | <input type="checkbox"/> |
|                                                                                                                                                   | Strongly Disagree          | <input type="checkbox"/> |
| If I didn't take steps to manage type 2 diabetes in people with SMI, they would come to serious harm ( <i>beliefs about consequences</i> )        | Strongly Agree             | <input type="checkbox"/> |
|                                                                                                                                                   | Agree                      | <input type="checkbox"/> |
|                                                                                                                                                   | Neither Agree nor Disagree | <input type="checkbox"/> |
|                                                                                                                                                   | Disagree                   | <input type="checkbox"/> |
|                                                                                                                                                   | Strongly Disagree          | <input type="checkbox"/> |
| I have a plan that I follow - either in my team or on my own - when managing type 2 diabetes in people with SMI ( <i>behavioural regulation</i> ) | Strongly Agree             | <input type="checkbox"/> |
|                                                                                                                                                   | Agree                      | <input type="checkbox"/> |
|                                                                                                                                                   | Neither Agree nor Disagree | <input type="checkbox"/> |
|                                                                                                                                                   | Disagree                   | <input type="checkbox"/> |
|                                                                                                                                                   | Strongly Disagree          | <input type="checkbox"/> |

1  
2  
3 I review how I manage type 2 diabetes in people with SMI, and  
4 identify ways in which I can improve (*behavioural regulation*)  
5  
6 Strongly Agree   
7 Agree   
8 Neither Agree nor Disagree   
9 Disagree   
10 Strongly Disagree   
11  
12  
13 Is providing general education about type 2 diabetes part of  
14 your clinical role? (*social professional role & identity*)  
15 Yes   
16 No   
17 *If yes, over the past 12 months, given 10 patients with both*  
18 *type 2 diabetes and SMI, for how many did you provide*  
19 *general education about diabetes?*   
20  
21  
22 Is giving advice about weight management to patients with  
23 both type 2 diabetes and SMI part of your clinical role? (*social*  
24 *professional role & identity*)  
25 Yes   
26 No   
27 *If yes, over the past 12 months, given 10 patients with both*  
28 *type 2 diabetes and SMI, for how many did you advice about*  
29 *weight management?*   
30  
31 Is providing personalised advice about diet and nutrition to  
32 patients with type 2 diabetes and SMI part of your clinical role?  
33 (*social professional role & identity*)  
34 Yes   
35 No   
36 *If yes, over the past 12 months, given 10 patients with both*  
37 *type 2 diabetes and SMI, for how many did you advice about*  
38 *diet and nutrition?*   
39  
40 Is monitoring the blood pressure for patients with type 2  
41 diabetes and SMI a part of your role? (*social professional role &*  
42 *identity*)  
43 Yes   
44 No   
45 *If yes, over the past 12 months, given 10 patients with both*  
46 *type 2 diabetes and SMI, for how many did you monitor their*  
47 *BP?*   
48  
49 Is examining the circulation and sensation in the feet of  
50 patients with type 2 diabetes and SMI part of your clinical role?  
51 (*social professional role & identity*)  
52 Yes   
53 No   
54 *If yes, over the past 12 months, given 10 patients with both*  
55 *type 2 diabetes and SMI, for how many did you examine*  
56 *their feet?*   
57  
58 Is working with patients with type 2 diabetes and SMI to agree  
59 a personalised HbA1c target and provide ongoing reviews a  
60 part of your clinical role? (*social professional role & identity*)  
Yes   
No

1  
2  
3 *If yes, over the past 12 months, given 10 patients with both*  
4 *type 2 diabetes and SMI, for how many did you agree a*  
5 *personalised HbA1c target and provide ongoing reviews?*

8 Is working with patients with type 2 diabetes and SMI to  
9 monitor their cholesterol part of your clinical role? (*social*  
10 *professional role & identity*)

Yes   
No

11 *If yes, over the past 12 months, given 10 patients with both*  
12 *type 2 diabetes and SMI, for how many did you monitor*  
13 *cholesterol?*

16 Is working with patients with type 2 diabetes and SMI to  
17 monitor their kidney function part of your clinical role? (*social*  
18 *professional role & identity*)

Yes   
No

20 *If yes, over the past 12 months, given 10 patients with both*  
21 *type 2 diabetes and SMI, for how many did you monitor*  
22 *kidney function?*

25 Is working with patients with type 2 diabetes and SMI to refer  
26 to retinopathy screening a part of your clinical role? (*social*  
27 *professional role & identity*)

Yes   
No

28 *If yes, over the past 12 months, given 10 patients with both*  
29 *type 2 diabetes and SMI, for how many did you refer to*  
30 *retinopathy screening?*

## Supplementary File B.

## Differences between professions on the barriers and enablers to delivering care

|                                                              | Mental Health Nurse (n = 124) | Psychiatrist (n=108) | GP (n=29)  | Other Nurses (n=60) | Allied Health Professionals (n=37) | Diabetologist or Endocrinologist (n=11) | ANOVA                                                         |
|--------------------------------------------------------------|-------------------------------|----------------------|------------|---------------------|------------------------------------|-----------------------------------------|---------------------------------------------------------------|
| I know the guidelines                                        | 3.31(1.08)                    | 3.11(1.04)           | 4.13(0.76) | 3.95(1.15)          | 3.10(1.14)                         | 4.54(0.63)                              | F (5, 50.63) = 24.78, <b>p &lt; 0.001</b> , $\omega^2 = 0.23$ |
| I know how to manage                                         | 3.41(0.98)                    | 3.08(0.94)           | 3.42(0.91) | 3.13(1.06)          | 2.81(1.17)                         | 3.83(0.87)                              | F (5, 267) = 4.34, <b>p = 0.01</b> , $\eta^2 = 0.08$          |
| I will follow the NICE diabetes guidelines                   | 3.80(0.99)                    | 3.67(0.94)           | 3.85(1.00) | 3.85(1.09)          | 3.38(1.21)                         | 3.73(1.06)                              | F (5, 267) = 1.46, $p = 0.21$ , $\eta^2 = 0.03$               |
| I have access to people with specialist diabetes knowledge   | 3.62(1.07)                    | 3.72(1.09)           | 3.88(0.82) | 3.80(1.10)          | 3.27(1.12)                         | 3.75(1.25)                              | F (5, 48.68) = 2.14, $p = 0.08$ , $\omega^2 = 0.02$           |
| I have access to people in primary care services             | 3.61(1.07)                    | 3.68(1.08)           | 3.82(1.21) | 3.27(1.25)          | 3.39(1.25)                         | 3.42(1.19)                              | F (5, 267) = 2.18, $p = 0.06$ , $\eta^2 = 0.04$               |
| I have access to people in mental health services            | 3.57(1.11)                    | 3.30(1.29)           | 3.12(1.16) | 3.31(1.19)          | 3.14(1.36)                         | 3.29(1.10)                              | F (5, 48.04) = 1.43, $p = 0.23$ , $\omega^2 = 0.01$           |
| I have enough time                                           | 3.10(1.02)                    | 2.74(1.04)           | 2.48(1.02) | 3.07(1.10)          | 2.84(1.20)                         | 2.59(1.11)                              | F (5, 267) = 3.12, <b>p = 0.009</b> , $\eta^2 = 0.009$        |
| More integrated IT systems would make it easier for me       | 3.72(1.05)                    | 3.72(1.18)           | 3.33(1.06) | 3.40(1.02)          | 3.48(1.34)                         | 3.97(0.95)                              | F (5, 267) = 2.38, <b>p = 0.04</b> , $\eta^2 = 0.04$          |
| I need more training in communication and negotiation skills | 3.07(1.12)                    | 2.75(1.12)           | 3.05(1.17) | 3.33(1.11)          | 3.20(1.41)                         | 3.64(1.22)                              | F (5, 46.14) = 5.73, <b>p &lt; 0.001</b> , $\omega^2 = 0.08$  |
| I need more training in diabetes                             | 3.64(1.10)                    | 3.61(1.13)           | 3.18(1.04) | 3.44(1.09)          | 3.79(1.28)                         | 3.21(1.36)                              | F (5, 267) = 4.18, <b>p = 0.001</b> , $\eta^2 = 0.07$         |
| Managing T2DM in people with SMI is as important as          | 4.31(0.86)                    | 4.16(0.87)           | 4.07(0.91) | 4.18(0.90)          | 4.21(1.17)                         | 4.14(1.00)                              | F (5, 267) = 2.47, <b>p = 0.03</b> , $\eta^2 = xxx$           |

|                                                                            | Mental Health Nurse (n = 124) | Psychiatrist (n=108) | GP (n=29)  | Other Nurses (n=60) | Allied Health Professionals (n=37) | Diabetologist or Endocrinologist (n=11) | ANOVA                                                     |
|----------------------------------------------------------------------------|-------------------------------|----------------------|------------|---------------------|------------------------------------|-----------------------------------------|-----------------------------------------------------------|
| managing their mental health                                               |                               |                      |            |                     |                                    |                                         |                                                           |
| Diabetes goals and targets need to be tailored for people with SMI         | 4.06(0.94)                    | 3.86(0.93)           | 4.17(0.92) | 4.21(0.97)          | 4.09(1.18)                         | 4.62(0.62)                              | F (5, 267) = 3.57, <b>p = 0.004</b> , $\eta^2 = 0.06$     |
| There is a definite focus in my trust                                      | 3.22(1.01)                    | 3.05(1.00)           | 2.50(0.92) | 3.10(1.16)          | 3.07(1.19)                         | 3.17(1.33)                              | F (5, 267) = 3.97, <b>p = 0.002</b> , $\eta^2 = 0.07$     |
| I prioritise management of mental health over management of T2DM           | 2.79(1.02)                    | 2.65(1.09)           | 2.76(0.80) | 3.00(0.91)          | 2.96(1.18)                         | 3.03(1.06)                              | F (5, 46.84) = 2.30, $p = 0.06$ , $\omega^2 = 0.02$       |
| I am optimistic that I will be able to manage T2DM in people with SMI      | 3.45(0.91)                    | 3.18(0.98)           | 3.52(0.80) | 3.39(0.93)          | 3.20(1.07)                         | 3.56(1.08)                              | F (5, 267) = 2.99, <b>p = 0.01</b> , $\eta^2 = 0.05$      |
| I feel optimistic about the health of my clients                           | 3.02(0.98)                    | 2.82(0.97)           | 2.78(0.98) | 3.04(0.97)          | 2.75(1.09)                         | 3.06(1.27)                              | F (5, 267) = 1.82, $p = 0.11$ , $\eta^2 = 0.03$           |
| I would be disciplined if I did not manage T2DM in people with SMI         | 3.37(1.11)                    | 2.95(1.08)           | 2.79(1.00) | 3.15(1.12)          | 3.16(1.26)                         | 3.16(1.05)                              | F (5, 267) = 3.81, <b>p = 0.002</b> , $\eta^2 = 0.07$     |
| Incentives, such as CQUINS or QOF points, encourage me                     | 2.88(1.12)                    | 2.51(1.11)           | 3.14(1.00) | 2.81(1.20)          | 2.79(1.16)                         | 2.82(0.90)                              | F (5, 267) = 3.53, <b>p = 0.004</b> , $\eta^2 = 0.06$     |
| Managing T2DM in someone with SMI is a routine part of my job              | 3.50(1.14)                    | 3.23(1.11)           | 3.93(0.90) | 3.62(1.22)          | 3.29(1.35)                         | 3.63(0.80)                              | F (5, 52.25) = 5.13, <b>p = 0.001</b> , $\omega^2 = 0.07$ |
| I tailor the treatment of T2DM in people with SMI depending on their needs | 3.57(1.06)                    | 3.39(0.98)           | 3.91(0.92) | 3.95(1.10)          | 3.33(1.21)                         | 4.08(0.84)                              | F (5, 267) = 5.25, <b>p &lt; 0.001</b> , $\eta^2 = 0.09$  |
| Managing T2DM in people with SMI worries or concerns me                    | 3.38(1.05)                    | 3.54(1.02)           | 3.27(1.03) | 3.32(1.12)          | 3.32(1.37)                         | 3.19(0.96)                              | F (5, 267) = 0.70, $p = 0.62$ , $\eta^2 = 0.01$           |
| Managing T2DM in people with SMI frustrates me                             | 2.84(1.08)                    | 3.07(1.12)           | 3.26(1.05) | 3.06(1.13)          | 3.13(1.38)                         | 3.00(0.86)                              | F (5, 267) = 1.25, $p = 0.29$ , $\eta^2 = 0.02$           |



|                                                                                           | Mental Health Nurse (n = 124) | Psychiatrist (n=108) | GP (n=29)  | Other Nurses (n=60) | Allied Health Professionals (n=37) | Diabetologist or Endocrinologist (n=11) | ANOVA                                                     |
|-------------------------------------------------------------------------------------------|-------------------------------|----------------------|------------|---------------------|------------------------------------|-----------------------------------------|-----------------------------------------------------------|
| Working with people with SMI scares me                                                    | 1.91(1.04)                    | 1.73(0.96)           | 1.97(0.98) | 2.29(1.10)          | 2.15(1.20)                         | 2.49(1.03)                              | F (5, 267) = 4.08, <b>p = 0.001</b> , $\eta^2 = 0.07$     |
| My patient's level of engagement is a key factor                                          | 3.77(1.04)                    | 3.56(1.04)           | 3.96(0.73) | 3.79(1.12)          | 3.40(1.32)                         | 4.08(0.75)                              | F (5, 50.40) = 3.29, <b>p = 0.01</b> , $\omega^2 = 0.04$  |
| I work as part of a team of healthcare professionals                                      | 3.53(1.15)                    | 3.29(1.25)           | 3.71(1.24) | 3.53(1.17)          | 3.41(1.35)                         | 3.91(1.09)                              | F (5, 267) = 2.02, $p = 0.08$ , $\eta^2 = 0.04$           |
| Family members and carers help me manage T2DM in people with SMI                          | 3.18(1.11)                    | 3.37(1.05)           | 3.58(0.97) | 3.43(1.13)          | 3.00(1.32)                         | 3.89(0.69)                              | F (5, 50.09) = 3.48, <b>p = 0.009</b> , $\omega^2 = 0.04$ |
| I feel confident in managing T2DM in people with SMI                                      | 3.30(1.03)                    | 3.01(1.00)           | 3.33(0.93) | 3.21(1.03)          | 2.99(1.09)                         | 3.51(0.83)                              | F (5, 267) = 2.09, $p = 0.07$ , $\eta^2 = 0.04$           |
| Poorly controlled T2DM in people with SMI affects their mental health                     | 4.08(0.95)                    | 4.13(0.90)           | 3.81(0.77) | 4.02(0.98)          | 3.74(1.27)                         | 4.28(0.88)                              | F (5, 267) = 1.68, $p = 0.14$ , $\eta^2 = 0.03$           |
| If I didn't take steps to manage T2DM in people with SMI, they would come to serious harm | 3.79(1.04)                    | 3.91(1.08)           | 3.85(0.88) | 3.86(0.97)          | 3.77(1.26)                         | 4.02(0.82)                              | F (5, 267) = 0.14, $p = 0.98$ , $\eta^2 < 0.001$          |
| I have a plan that I follow - either in my team or on my own                              | 3.39(1.13)                    | 3.37(1.03)           | 3.39(0.99) | 3.41(1.10)          | 3.33(1.15)                         | 3.67(0.94)                              | F (5, 267) = 0.18, $p = 0.97$ , $\eta^2 < 0.001$          |
| I review how I manage T2DM in people with SMI, and identify ways in which I can improve   | 3.43(1.12)                    | 3.37(1.03)           | 3.29(0.97) | 3.62(1.05)          | 3.34(1.15)                         | 3.70(0.9)                               | F (5, 267) = 1.51, $p = 0.20$ , $\eta^2 = 0.03$           |
| How many of the 9 diabetes care standard are you responsible for?                         | 3.81(2.30)                    | 3.69(2.47)           | 6.65(2.02) | 5.83(2.92)          | 2.42(3.06)                         | 7.67(1.58)                              | F (5, 267) = 14.46, <b>p &lt; 0.001</b> , $\eta^2 = 0.21$ |

Responses were 1-5, with a higher score reflecting greater agreement.

**STROBE 2007 (v4) Statement—Checklist of items that should be included in reports of *cross-sectional studies***

| Section/Topic                | Item # | Recommendation                                                                                                                                                                       | Reported on page # |
|------------------------------|--------|--------------------------------------------------------------------------------------------------------------------------------------------------------------------------------------|--------------------|
| <b>Title and abstract</b>    | 1      | (a) Indicate the study's design with a commonly used term in the title or the abstract                                                                                               | 1                  |
|                              |        | (b) Provide in the abstract an informative and balanced summary of what was done and what was found                                                                                  | 2                  |
| <b>Introduction</b>          |        |                                                                                                                                                                                      |                    |
| Background/rationale         | 2      | Explain the scientific background and rationale for the investigation being reported                                                                                                 | 5-6                |
| Objectives                   | 3      | State specific objectives, including any prespecified hypotheses                                                                                                                     | 6                  |
| <b>Methods</b>               |        |                                                                                                                                                                                      |                    |
| Study design                 | 4      | Present key elements of study design early in the paper                                                                                                                              | 6                  |
| Setting                      | 5      | Describe the setting, locations, and relevant dates, including periods of recruitment, exposure, follow-up, and data collection                                                      | 6-7                |
| Participants                 | 6      | (a) Give the eligibility criteria, and the sources and methods of selection of participants                                                                                          | 6-7                |
| Variables                    | 7      | Clearly define all outcomes, exposures, predictors, potential confounders, and effect modifiers. Give diagnostic criteria, if applicable                                             | 7-8                |
| Data sources/<br>measurement | 8*     | For each variable of interest, give sources of data and details of methods of assessment (measurement). Describe comparability of assessment methods if there is more than one group | 7-8                |
| Bias                         | 9      | Describe any efforts to address potential sources of bias                                                                                                                            | n/a                |
| Study size                   | 10     | Explain how the study size was arrived at                                                                                                                                            | 7                  |
| Quantitative variables       | 11     | Explain how quantitative variables were handled in the analyses. If applicable, describe which groupings were chosen and why                                                         | 8                  |
| Statistical methods          | 12     | (a) Describe all statistical methods, including those used to control for confounding                                                                                                | 8                  |
|                              |        | (b) Describe any methods used to examine subgroups and interactions                                                                                                                  | 8                  |
|                              |        | (c) Explain how missing data were addressed                                                                                                                                          | 8                  |
|                              |        | (d) If applicable, describe analytical methods taking account of sampling strategy                                                                                                   | n/a                |
|                              |        | (e) Describe any sensitivity analyses                                                                                                                                                | n/a                |
| <b>Results</b>               |        |                                                                                                                                                                                      |                    |

|                          |     |                                                                                                                                                                                                              |       |
|--------------------------|-----|--------------------------------------------------------------------------------------------------------------------------------------------------------------------------------------------------------------|-------|
| Participants             | 13* | (a) Report numbers of individuals at each stage of study—eg numbers potentially eligible, examined for eligibility, confirmed eligible, included in the study, completing follow-up, and analysed            | 9     |
|                          |     | (b) Give reasons for non-participation at each stage                                                                                                                                                         | n/a   |
|                          |     | (c) Consider use of a flow diagram                                                                                                                                                                           | n/a   |
| Descriptive data         | 14* | (a) Give characteristics of study participants (eg demographic, clinical, social) and information on exposures and potential confounders                                                                     | 9-10  |
|                          |     | (b) Indicate number of participants with missing data for each variable of interest                                                                                                                          | 9     |
| Outcome data             | 15* | Report numbers of outcome events or summary measures                                                                                                                                                         | 10-22 |
| Main results             | 16  | (a) Give unadjusted estimates and, if applicable, confounder-adjusted estimates and their precision (eg, 95% confidence interval). Make clear which confounders were adjusted for and why they were included | 10-22 |
|                          |     | (b) Report category boundaries when continuous variables were categorized                                                                                                                                    | 10-22 |
|                          |     | (c) If relevant, consider translating estimates of relative risk into absolute risk for a meaningful time period                                                                                             | n/a   |
| Other analyses           | 17  | Report other analyses done—eg analyses of subgroups and interactions, and sensitivity analyses                                                                                                               | n/a   |
| <b>Discussion</b>        |     |                                                                                                                                                                                                              |       |
| Key results              | 18  | Summarise key results with reference to study objectives                                                                                                                                                     | 22    |
| Limitations              | 19  | Discuss limitations of the study, taking into account sources of potential bias or imprecision. Discuss both direction and magnitude of any potential bias                                                   | 25-26 |
| Interpretation           | 20  | Give a cautious overall interpretation of results considering objectives, limitations, multiplicity of analyses, results from similar studies, and other relevant evidence                                   | 22-25 |
| Generalisability         | 21  | Discuss the generalisability (external validity) of the study results                                                                                                                                        | 25-26 |
| <b>Other information</b> |     |                                                                                                                                                                                                              |       |
| Funding                  | 22  | Give the source of funding and the role of the funders for the present study and, if applicable, for the original study on which the present article is based                                                | 26    |

\*Give information separately for cases and controls in case-control studies and, if applicable, for exposed and unexposed groups in cohort and cross-sectional studies.

**Note:** An Explanation and Elaboration article discusses each checklist item and gives methodological background and published examples of transparent reporting. The STROBE checklist is best used in conjunction with this article (freely available on the Web sites of PLoS Medicine at <http://www.plosmedicine.org/>, Annals of Internal Medicine at <http://www.annals.org/>, and Epidemiology at <http://www.epidem.com/>). Information on the STROBE Initiative is available at [www.strobe-statement.org](http://www.strobe-statement.org).
