# Supplementary material for: Management of type 2 diabetes mellitus in people with severe mental illness: an online cross-sectional survey of healthcare professionals
Source: PubMed Central journal article supplement — BMJ Open. 2018 Feb 15;8(2):e019400. doi: 10.1136/bmjopen-2017-019400 (PMC5829882; doi:10.1136/bmjopen-2017-019400), 2018-02-15
Supplement: bmjopen-2017-019400supp001.pdf [file bmjopen-2017-019400supp001.pdf]

## Supplementary File A.

### Questionnaire to Measures the Barriers and Enablers to Delivering Diabetes Care in People with SMI (*TDF domain*)

I know the guidelines, national or local, for managing type 2 diabetes (*knowledge*)

Strong Agree

Agree

Neither Agree nor Disagree

Disagree

Strongly Disagree

I know how to manage type 2 diabetes in people with SMI (*knowledge*)

Strong Agree

Agree

Neither Agree nor Disagree

Disagree

Strongly Disagree

How likely is it that you will follow the NICE diabetes guidelines for your patients who have type 2 diabetes and SMI? (*intention*)

Very Likely

Likely

Neither Likely nor Unlikely

Unlikely

Very Unlikely

I have access to people with specialist diabetes knowledge to help me manage type 2 diabetes in people with SMI (*environmental context & resources*)

Strong Agree

Agree

Neither Agree nor Disagree

Disagree

Strongly Disagree

I have access to people in primary care services for my patients with type 2 diabetes and SMI (*environmental context & resources*)

Strong Agree

Agree

Neither Agree nor Disagree

Disagree

Strongly Disagree

I have access to people in mental health services for my patients with type 2 diabetes and SMI (*environmental context & resources*)

- Strong Agree
- Agree
- Neither Agree nor Disagree
- Disagree
- Strongly Disagree

I have enough time to manage type 2 diabetes in people with SMI (*environmental context & resources*)

- Strong Agree
- Agree
- Neither Agree nor Disagree
- Disagree
- Strongly Disagree

More integrated IT systems would make it easier for me to manage type 2 diabetes in people with SMI (*environmental context & resources*)

- Strong Agree
- Agree
- Neither Agree nor Disagree
- Disagree
- Strongly Disagree

I need more training in communication and negotiation skills in order to manage type 2 diabetes in people with SMI (*skills*)

- Strong Agree
- Agree
- Neither Agree nor Disagree
- Disagree
- Strongly Disagree

I need more training in diabetes in order to manage type 2 diabetes in people with SMI (*skills*)

- Strong Agree
- Agree
- Neither Agree nor Disagree
- Disagree
- Strongly Disagree

Managing patients' type 2 diabetes in people with SMI is as important as managing their mental health (*goal*)

Strong Agree

Agree

Neither Agree nor Disagree

Disagree

Strongly Disagree

Diabetes goals and targets need to be tailored for people with SMI (*goal*)

Strong Agree

Agree

Neither Agree nor Disagree

Disagree

Strongly Disagree

There is a definite focus in my trust on managing type 2 diabetes in people with SMI (*goal*)

Strong Agree

Agree

Neither Agree nor Disagree

Disagree

Strongly Disagree

I prioritise management of mental health over management of type 2 diabetes in people with type 2 diabetes and SMI (*goal*)

Strong Agree

Agree

Neither Agree nor Disagree

Disagree

Strongly Disagree

I am optimistic that I will be able to manage type 2 diabetes in people with SMI (*optimism*)

Strong Agree

Agree

Neither Agree nor Disagree

Disagree

Strongly Disagree

I feel optimistic about the health of my patients with type 2 diabetes and SMI (*optimism*)

- Strong Agree
- Agree
- Neither Agree nor Disagree
- Disagree
- Strongly Disagree

I would be disciplined if I did not manage type 2 diabetes in people with SMI (*reinforcement*)

- Strong Agree
- Agree
- Neither Agree nor Disagree
- Disagree
- Strongly Disagree

Incentives, such as CQUINS or QOF points, encourage me to manage type 2 diabetes in people with SMI (*reinforcement*)

- Strong Agree
- Agree
- Neither Agree nor Disagree
- Disagree
- Strongly Disagree

Managing type 2 diabetes in someone with SMI is a routine part of my job (*memory, attention and decision*)

- Strong Agree
- Agree
- Neither Agree nor Disagree
- Disagree
- Strongly Disagree

I tailor the treatment of type 2 diabetes in people with SMI depending on their needs (*memory, attention and decision*)

- Strong Agree
- Agree
- Neither Agree nor Disagree
- Disagree
- Strongly Disagree

Managing type 2 diabetes in people with SMI worries or concerns me (*emotion*)

Strong Agree

Agree

Neither Agree nor Disagree

Disagree

Strongly Disagree

Managing type 2 diabetes in people with SMI frustrates me (*emotion*)

Strong Agree

Agree

Neither Agree nor Disagree

Disagree

Strongly Disagree

Working with people with SMI scares me (*emotion*)

Strong Agree

Agree

Neither Agree nor Disagree

Disagree

Strongly Disagree

My patient's level of engagement is a key factor in how I manage the type 2 diabetes in people with SMI (*social influence*)

Strong Agree

Agree

Neither Agree nor Disagree

Disagree

Strongly Disagree

I work as part of a team of healthcare professionals to help manage type 2 diabetes in people with SMI (*social influence*)

Strong Agree

Agree

Neither Agree nor Disagree

Disagree

Strongly Disagree

Family members and carers help me manage type 2 diabetes in people with SMI (*social influence*)

Strong Agree

Agree

Neither Agree nor Disagree

Disagree

Strongly Disagree

I feel confident about managing type 2 diabetes in people with SMI (*beliefs about capabilities*)

Strong Agree

Agree

Neither Agree nor Disagree

Disagree

Strongly Disagree

Poorly controlled type 2 diabetes in people with SMI affects their mental health (*beliefs about consequences*)

Strong Agree

Agree

Neither Agree nor Disagree

Disagree

Strongly Disagree

If I didn't take steps to manage type 2 diabetes in people with SMI, they would come to serious harm (*beliefs about consequences*)

Strong Agree

Agree

Neither Agree nor Disagree

Disagree

Strongly Disagree

I have a plan that I follow - either in my team or on my own - when managing type 2 diabetes in people with SMI (*behavioural regulation*)

Strong Agree

Agree

Neither Agree nor Disagree

Disagree

Strongly Disagree

I review how I manage type 2 diabetes in people with SMI, and identify ways in which I can improve (*behavioural regulation*)

Strongly Agree

Agree

Neither Agree nor Disagree

Disagree

Strongly Disagree

Is providing general education about type 2 diabetes part of your clinical role? (*social professional role & identity*)

Yes

No

*If yes, over the past 12 months, given 10 patients with both type 2 diabetes and SMI, for how many did you provide general education about diabetes?*

Is giving advice about weight management to patients with both type 2 diabetes and SMI part of your clinical role? (*social professional role & identity*)

Yes

No

*If yes, over the past 12 months, given 10 patients with both type 2 diabetes and SMI, for how many did you advice about weight management?*

Is providing personalised advice about diet and nutrition to patients with type 2 diabetes and SMI part of your clinical role? (*social professional role & identity*)

Yes

No

*If yes, over the past 12 months, given 10 patients with both type 2 diabetes and SMI, for how many did you advice about diet and nutrition?*

Is monitoring the blood pressure for patients with type 2 diabetes and SMI a part of your role? (*social professional role & identity*)

Yes

No

*If yes, over the past 12 months, given 10 patients with both type 2 diabetes and SMI, for how many did you monitor their BP?*

Is examining the circulation and sensation in the feet of patients with type 2 diabetes and SMI part of your clinical role? (*social professional role & identity*)

Yes

No

*If yes, over the past 12 months, given 10 patients with both type 2 diabetes and SMI, for how many did you examine their feet?*

Is working with patients with type 2 diabetes and SMI to agree a personalised HbA1c target and provide ongoing reviews a part of your clinical role? (*social professional role & identity*)

Yes

No

*If yes, over the past 12 months, given 10 patients with both type 2 diabetes and SMI, for how many did you agree a personalised HbA1c target and provide ongoing reviews?*

Is working with patients with type 2 diabetes and SMI to monitor their cholesterol part of your clinical role? (*social professional role & identity*)

Yes

No

*If yes, over the past 12 months, given 10 patients with both type 2 diabetes and SMI, for how many did you monitor cholesterol?*

Is working with patients with type 2 diabetes and SMI to monitor their kidney function part of your clinical role? (*social professional role & identity*)

Yes

No

*If yes, over the past 12 months, given 10 patients with both type 2 diabetes and SMI, for how many did you monitor kidney function?*

Is working with patients with type 2 diabetes and SMI to refer to retinopathy screening a part of your clinical role? (*social professional role & identity*)

Yes

No

*If yes, over the past 12 months, given 10 patients with both type 2 diabetes and SMI, for how many did you refer to retinopathy screening?*
