# Supplementary material for: Management of type 2 diabetes mellitus in people with severe mental illness: an online cross-sectional survey of healthcare professionals
Source: PubMed Central journal article supplement — BMJ Open. 2018 Feb 15;8(2):e019400. doi: 10.1136/bmjopen-2017-019400 (PMC5829882; doi:10.1136/bmjopen-2017-019400), 2018-02-15
Supplement: bmjopen-2017-019400supp002.pdf [file bmjopen-2017-019400supp002.pdf]

## Supplementary File B.

### Differences between professions on the barriers and enablers to delivering care

|                                                              | Mental Health Nurse (n = 124) | Psychiatrist (n=108) | GP (n=29)  | Other Nurses (n=60) | Allied Health Professionals (n=37) | Diabetologist or Endocrinologist (n=11) | ANOVA                                                         |
|--------------------------------------------------------------|-------------------------------|----------------------|------------|---------------------|------------------------------------|-----------------------------------------|---------------------------------------------------------------|
| I know the guidelines                                        | 3.31(1.08)                    | 3.11(1.04)           | 4.13(0.76) | 3.95(1.15)          | 3.10(1.14)                         | 4.54(0.63)                              | F (5, 50.63) = 24.78, <b>p &lt; 0.001</b> , $\omega^2 = 0.23$ |
| I know how to manage                                         | 3.41(0.98)                    | 3.08(0.94)           | 3.42(0.91) | 3.13(1.06)          | 2.81(1.17)                         | 3.83(0.87)                              | F (5, 267) = 4.34, <b>p = 0.01</b> , $\eta^2 = 0.08$          |
| I will follow the NICE diabetes guidelines                   | 3.80(0.99)                    | 3.67(0.94)           | 3.85(1.00) | 3.85(1.09)          | 3.38(1.21)                         | 3.73(1.06)                              | F (5, 267) = 1.46, $p = 0.21$ , $\eta^2 = 0.03$               |
| I have access to people with specialist diabetes knowledge   | 3.62(1.07)                    | 3.72(1.09)           | 3.88(0.82) | 3.80(1.10)          | 3.27(1.12)                         | 3.75(1.25)                              | F (5, 48.68) = 2.14, $p = 0.08$ , $\omega^2 = 0.02$           |
| I have access to people in primary care services             | 3.61(1.07)                    | 3.68(1.08)           | 3.82(1.21) | 3.27(1.25)          | 3.39(1.25)                         | 3.42(1.19)                              | F (5, 267) = 2.18, $p = 0.06$ , $\eta^2 = 0.04$               |
| I have access to people in mental health services            | 3.57(1.11)                    | 3.30(1.29)           | 3.12(1.16) | 3.31(1.19)          | 3.14(1.36)                         | 3.29(1.10)                              | F (5, 48.04) = 1.43, $p = 0.23$ , $\omega^2 = 0.01$           |
| I have enough time                                           | 3.10(1.02)                    | 2.74(1.04)           | 2.48(1.02) | 3.07(1.10)          | 2.84(1.20)                         | 2.59(1.11)                              | F (5, 267) = 3.12, <b>p = 0.009</b> , $\eta^2 = 0.009$        |
| More integrated IT systems would make it easier for me       | 3.72(1.05)                    | 3.72(1.18)           | 3.33(1.06) | 3.40(1.02)          | 3.48(1.34)                         | 3.97(0.95)                              | F (5, 267) = 2.38, <b>p = 0.04</b> , $\eta^2 = 0.04$          |
| I need more training in communication and negotiation skills | 3.07(1.12)                    | 2.75(1.12)           | 3.05(1.17) | 3.33(1.11)          | 3.20(1.41)                         | 3.64(1.22)                              | F (5, 46.14) = 5.73, <b>p &lt; 0.001</b> , $\omega^2 = 0.08$  |
| I need more training in diabetes                             | 3.64(1.10)                    | 3.61(1.13)           | 3.18(1.04) | 3.44(1.09)          | 3.79(1.28)                         | 3.21(1.36)                              | F (5, 267) = 4.18, <b>p = 0.001</b> , $\eta^2 = 0.07$         |
| Managing T2DM in people with SMI is as important as          | 4.31(0.86)                    | 4.16(0.87)           | 4.07(0.91) | 4.18(0.90)          | 4.21(1.17)                         | 4.14(1.00)                              | F (5, 267) = 2.47, <b>p = 0.03</b> , $\eta^2 = xxx$           |

|                                                                            | Mental Health Nurse (n = 124) | Psychiatrist (n=108) | GP (n=29)  | Other Nurses (n=60) | Allied Health Professionals (n=37) | Diabetologist or Endocrinologist (n=11) | ANOVA                                                     |
|----------------------------------------------------------------------------|-------------------------------|----------------------|------------|---------------------|------------------------------------|-----------------------------------------|-----------------------------------------------------------|
| managing their mental health                                               |                               |                      |            |                     |                                    |                                         |                                                           |
| Diabetes goals and targets need to be tailored for people with SMI         | 4.06(0.94)                    | 3.86(0.93)           | 4.17(0.92) | 4.21(0.97)          | 4.09(1.18)                         | 4.62(0.62)                              | F (5, 267) = 3.57, <b>p = 0.004</b> , $\eta^2 = 0.06$     |
| There is a definite focus in my trust                                      | 3.22(1.01)                    | 3.05(1.00)           | 2.50(0.92) | 3.10(1.16)          | 3.07(1.19)                         | 3.17(1.33)                              | F (5, 267) = 3.97, <b>p = 0.002</b> , $\eta^2 = 0.07$     |
| I prioritise management of mental health over management of T2DM           | 2.79(1.02)                    | 2.65(1.09)           | 2.76(0.80) | 3.00(0.91)          | 2.96(1.18)                         | 3.03(1.06)                              | F (5, 46.84) = 2.30, $p = 0.06$ , $\omega^2 = 0.02$       |
| I am optimistic that I will be able to manage T2DM in people with SMI      | 3.45(0.91)                    | 3.18(0.98)           | 3.52(0.80) | 3.39(0.93)          | 3.20(1.07)                         | 3.56(1.08)                              | F (5, 267) = 2.99, <b>p = 0.01</b> , $\eta^2 = 0.05$      |
| I feel optimistic about the health of my clients                           | 3.02(0.98)                    | 2.82(0.97)           | 2.78(0.98) | 3.04(0.97)          | 2.75(1.09)                         | 3.06(1.27)                              | F (5, 267) = 1.82, $p = 0.11$ , $\eta^2 = 0.03$           |
| I would be disciplined if I did not manage T2DM in people with SMI         | 3.37(1.11)                    | 2.95(1.08)           | 2.79(1.00) | 3.15(1.12)          | 3.16(1.26)                         | 3.16(1.05)                              | F (5, 267) = 3.81, <b>p = 0.002</b> , $\eta^2 = 0.07$     |
| Incentives, such as CQUINS or QOF points, encourage me                     | 2.88(1.12)                    | 2.51(1.11)           | 3.14(1.00) | 2.81(1.20)          | 2.79(1.16)                         | 2.82(0.90)                              | F (5, 267) = 3.53, <b>p = 0.004</b> , $\eta^2 = 0.06$     |
| Managing T2DM in someone with SMI is a routine part of my job              | 3.50(1.14)                    | 3.23(1.11)           | 3.93(0.90) | 3.62(1.22)          | 3.29(1.35)                         | 3.63(0.80)                              | F (5, 52.25) = 5.13, <b>p = 0.001</b> , $\omega^2 = 0.07$ |
| I tailor the treatment of T2DM in people with SMI depending on their needs | 3.57(1.06)                    | 3.39(0.98)           | 3.91(0.92) | 3.95(1.10)          | 3.33(1.21)                         | 4.08(0.84)                              | F (5, 267) = 5.25, <b>p &lt; 0.001</b> , $\eta^2 = 0.09$  |
| Managing T2DM in people with SMI worries or concerns me                    | 3.38(1.05)                    | 3.54(1.02)           | 3.27(1.03) | 3.32(1.12)          | 3.32(1.37)                         | 3.19(0.96)                              | F (5, 267) = 0.70, $p = 0.62$ , $\eta^2 = 0.01$           |
| Managing T2DM in people with SMI frustrates me                             | 2.84(1.08)                    | 3.07(1.12)           | 3.26(1.05) | 3.06(1.13)          | 3.13(1.38)                         | 3.00(0.86)                              | F (5, 267) = 1.25, $p = 0.29$ , $\eta^2 = 0.02$           |

|                                                                                           | Mental Health Nurse (n = 124) | Psychiatrist (n=108) | GP (n=29)  | Other Nurses (n=60) | Allied Health Professionals (n=37) | Diabetologist or Endocrinologist (n=11) | ANOVA                                                     |
|-------------------------------------------------------------------------------------------|-------------------------------|----------------------|------------|---------------------|------------------------------------|-----------------------------------------|-----------------------------------------------------------|
| Working with people with SMI scares me                                                    | 1.91(1.04)                    | 1.73(0.96)           | 1.97(0.98) | 2.29(1.10)          | 2.15(1.20)                         | 2.49(1.03)                              | F (5, 267) = 4.08, <b>p = 0.001</b> , $\eta^2 = 0.07$     |
| My patient's level of engagement is a key factor                                          | 3.77(1.04)                    | 3.56(1.04)           | 3.96(0.73) | 3.79(1.12)          | 3.40(1.32)                         | 4.08(0.75)                              | F (5, 50.40) = 3.29, <b>p = 0.01</b> , $\omega^2 = 0.04$  |
| I work as part of a team of healthcare professionals                                      | 3.53(1.15)                    | 3.29(1.25)           | 3.71(1.24) | 3.53(1.17)          | 3.41(1.35)                         | 3.91(1.09)                              | F (5, 267) = 2.02, $p = 0.08$ , $\eta^2 = 0.04$           |
| Family members and carers help me manage T2DM in people with SMI                          | 3.18(1.11)                    | 3.37(1.05)           | 3.58(0.97) | 3.43(1.13)          | 3.00(1.32)                         | 3.89(0.69)                              | F (5, 50.09) = 3.48, <b>p = 0.009</b> , $\omega^2 = 0.04$ |
| I feel confident in managing T2DM in people with SMI                                      | 3.30(1.03)                    | 3.01(1.00)           | 3.33(0.93) | 3.21(1.03)          | 2.99(1.09)                         | 3.51(0.83)                              | F (5, 267) = 2.09, $p = 0.07$ , $\eta^2 = 0.04$           |
| Poorly controlled T2DM in people with SMI affects their mental health                     | 4.08(0.95)                    | 4.13(0.90)           | 3.81(0.77) | 4.02(0.98)          | 3.74(1.27)                         | 4.28(0.88)                              | F (5, 267) = 1.68, $p = 0.14$ , $\eta^2 = 0.03$           |
| If I didn't take steps to manage T2DM in people with SMI, they would come to serious harm | 3.79(1.04)                    | 3.91(1.08)           | 3.85(0.88) | 3.86(0.97)          | 3.77(1.26)                         | 4.02(0.82)                              | F (5, 267) = 0.14, $p = 0.98$ , $\eta^2 < 0.001$          |
| I have a plan that I follow - either in my team or on my own                              | 3.39(1.13)                    | 3.37(1.03)           | 3.39(0.99) | 3.41(1.10)          | 3.33(1.15)                         | 3.67(0.94)                              | F (5, 267) = 0.18, $p = 0.97$ , $\eta^2 < 0.001$          |
| I review how I manage T2DM in people with SMI, and identify ways in which I can improve   | 3.43(1.12)                    | 3.37(1.03)           | 3.29(0.97) | 3.62(1.05)          | 3.34(1.15)                         | 3.70(0.9)                               | F (5, 267) = 1.51, $p = 0.20$ , $\eta^2 = 0.03$           |
| How many of the 9 diabetes care standard are you responsible for?                         | 3.81(2.30)                    | 3.69(2.47)           | 6.65(2.02) | 5.83(2.92)          | 2.42(3.06)                         | 7.67(1.58)                              | F (5, 267) = 14.46, <b>p &lt; 0.001</b> , $\eta^2 = 0.21$ |

Responses were 1-5, with a higher score reflecting greater agreement.
